# Supplementary material
Source: PubMed Central journal article supplement (PMC7219545)

# Ligand-Enabled mono-Selective $\beta$ -C(sp<sup>3</sup>)-H Acyloxylation of Free Carboxylic Acids Using a Practical Oxidant

Zhe Zhuang,<sup>1</sup> Alastair N. Herron,<sup>1</sup> Zhoulong Fan,<sup>1</sup> and Jin-Quan Yu<sup>1\*</sup>

<sup>1</sup>The Scripps Research Institute, 10550 N. Torrey Pines Road, La Jolla, CA 92037, USA.

## Table of Contents

|                                                                                                |     |
|------------------------------------------------------------------------------------------------|-----|
| General Information                                                                            | S2  |
| Experimental Section                                                                           |     |
| Preparation of Aliphatic Carboxylic Acids                                                      | S3  |
| Preparation of Mono- <i>N</i> -Protected $\beta$ -Amino Acid Ligands                           | S4  |
| Table S1. Ligand Investigation for $\beta$ -C(sp <sup>3</sup> )-H Acetoxylation                | S5  |
| Table S2. Base Investigation for $\beta$ -C(sp <sup>3</sup> )-H Acetoxylation                  | S6  |
| Table S3. Oxidant Investigation for $\beta$ -C(sp <sup>3</sup> )-H Acetoxylation               | S6  |
| Table S4. Base Loadings Investigation for $\beta$ -C(sp <sup>3</sup> )-H Acetoxylation         | S7  |
| Table S5. Temperature Investigation for $\beta$ -C(sp <sup>3</sup> )-H Acetoxylation           | S7  |
| Table S6. Base Investigation for Intramolecular $\beta$ -C(sp <sup>3</sup> )-H Acyloxylation   | S8  |
| Table S7. Acid Anhydride Scope for Intramolecular $\beta$ -C(sp <sup>3</sup> )-H Acyloxylation | S8  |
| Table S8. Selected Unsuccessful Substrates                                                     | S8  |
| General Procedure for $\beta$ -C(sp <sup>3</sup> )-H Acetoxylation                             | S9  |
| Substrate Scope for $\beta$ -C(sp <sup>3</sup> )-H Acetoxylation                               | S10 |
| Scale-up Reaction for $\beta$ -C(sp <sup>3</sup> )-H Acetoxylation                             | S20 |
| Experimental Procedure for Deprotection of Acetyl Group                                        | S21 |
| General Procedure for Intramolecular $\beta$ -C(sp <sup>3</sup> )-H Acyloxylation              | S22 |
| Substrate Scope for Intramolecular $\beta$ -C(sp <sup>3</sup> )-H Acyloxylation                | S23 |
| References                                                                                     | S25 |
| <sup>1</sup> H and <sup>13</sup> C NMR Spectra                                                 | S27 |

**General Information:** HFIP was obtained from Oakwood. Pd(OAc)<sub>2</sub> was obtained from Strem. TBHP (70% in water or ca. 5.5 M in decane) was purchased from Sigma-Aldrich. Carboxylic acids were obtained from the commercial sources or synthesized following literature procedures. Other reagents were purchased at the highest commercial quality and used without further purification, unless otherwise stated. Analytical thin layer chromatography was performed on 0.25 mm silica gel 60-F254. Visualization was carried out with short-wave UV light or KMnO<sub>4</sub> and heat as developing agents. <sup>1</sup>H NMR spectra were recorded on Bruker DRX-600 instrument. Chemical shifts were quoted in parts per million (ppm) referenced to 0.0 ppm for TMS. The following abbreviations (or combinations thereof) were used to explain multiplicities: s = singlet, d = doublet, t = triplet, q = quartet, m = multiplet, br = broad. Coupling constants, *J*, were reported in Hertz unit (Hz). <sup>13</sup>C NMR spectra were recorded on Bruker DRX-600 and were fully decoupled by broad band proton decoupling. Chemical shifts were reported in ppm referenced to the center line of a triplet at 77.16 ppm of CDCl<sub>3</sub>. Column chromatography was performed using E. Merck silica (60, particle size 0.043–0.063 mm), and pTLC was performed on Merck silica plates (60F-254). High-resolution mass spectra (HRMS) were recorded on an Agilent Mass spectrometer using ESI-TOF (electrospray ionization-time of flight).

## Preparation of Aliphatic Carboxylic Acids

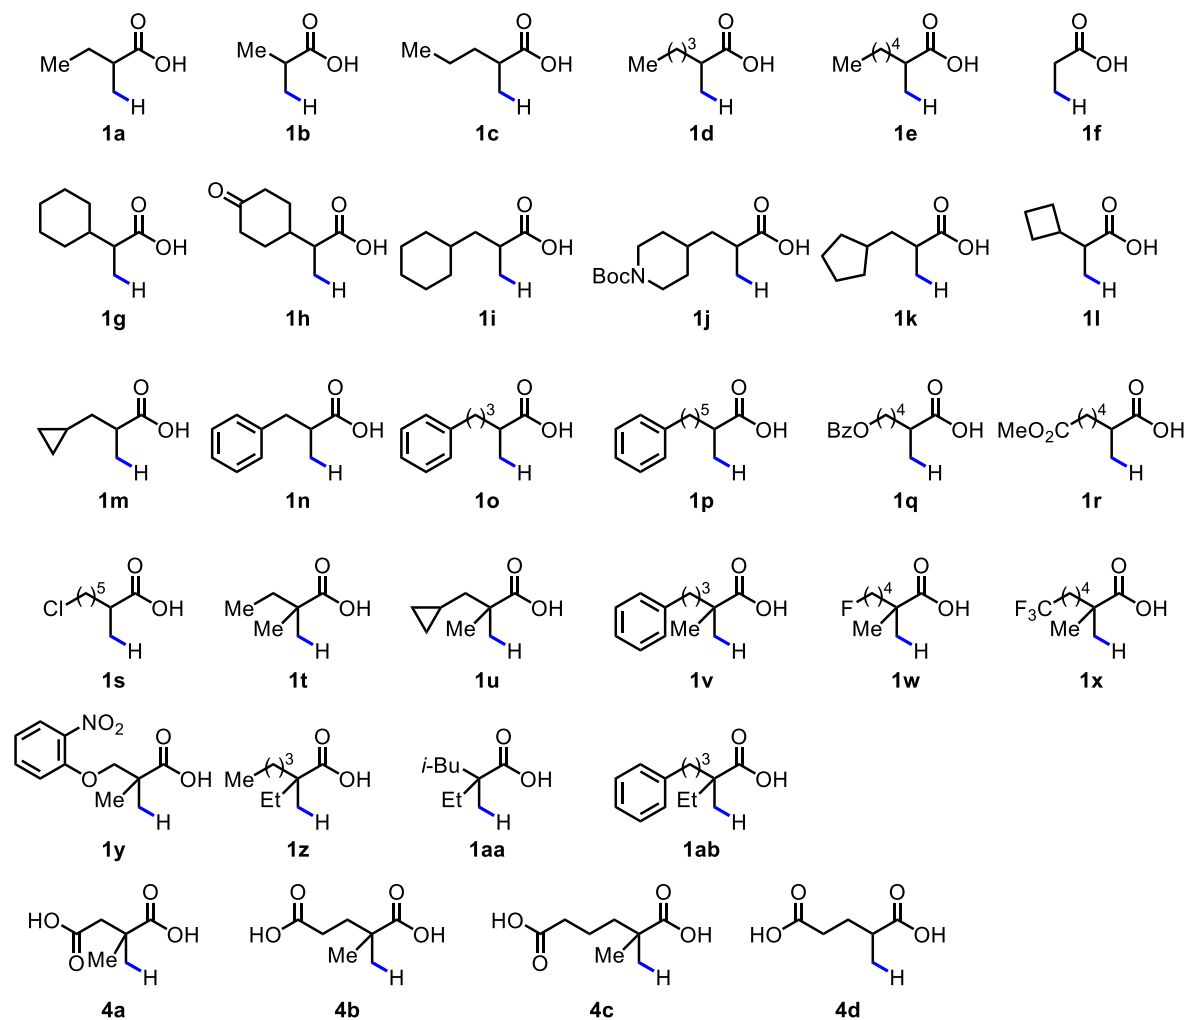

Aliphatic carboxylic acids were obtained from the commercial sources or synthesized following literature procedures<sup>1-3</sup>.

## Preparation of Mono-*N*-Protected $\beta$ -Amino Acid Ligands

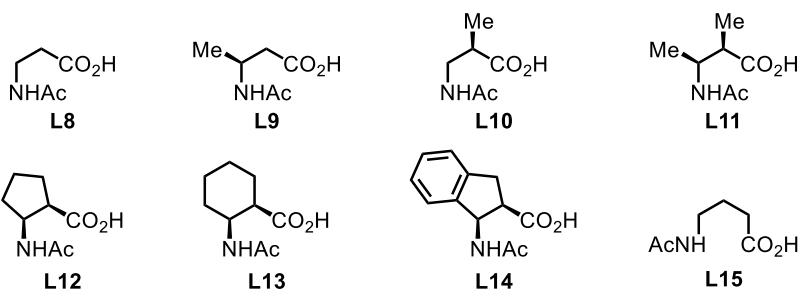

Mono-*N*-protected amino acid ligands were obtained from the commercial sources or synthesized following literature procedures<sup>4-7</sup>.

**Table S1. Ligand Investigation for  $\beta$ -C(sp<sup>3</sup>)-H Acetoxylation<sup>a,b</sup>**

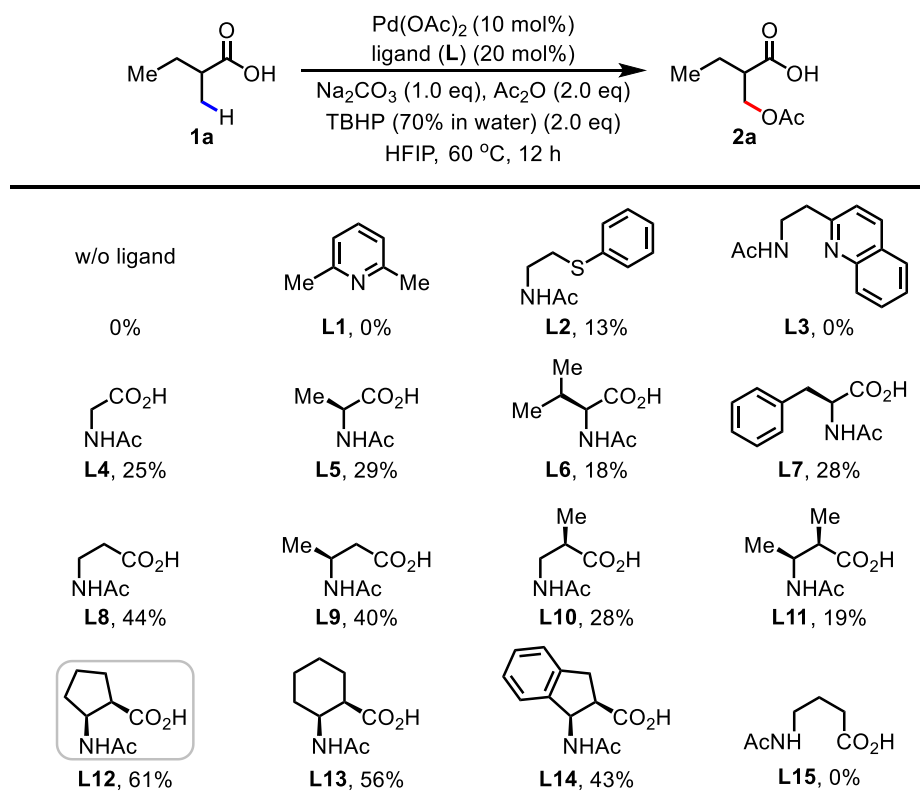

<sup>a</sup>Conditions: **1a** (0.1 mmol), Pd(OAc)<sub>2</sub> (10 mol%), **L** (20 mol%), Na<sub>2</sub>CO<sub>3</sub> (1.0 eq), TBHP (70% in water) (2.0 eq), Ac<sub>2</sub>O (2.0 eq), HFIP (1.0 mL), 60 °C, 12 h. <sup>b</sup>The yields were determined by <sup>1</sup>H NMR analysis of the crude product using CH<sub>2</sub>Br<sub>2</sub> as the internal standard.

**Table S2. Base Investigation for  $\beta$ -C(sp<sup>3</sup>)-H Acetoxylation<sup>a,b</sup>**

| entry | base                                                | yield (%) | entry | base                            | yield (%) |
|-------|-----------------------------------------------------|-----------|-------|---------------------------------|-----------|
| 1     | w/o                                                 | 0         | 7     | Na <sub>3</sub> PO <sub>4</sub> | 34        |
| 2     | NaHCO <sub>3</sub>                                  | 13        | 8     | NaOAc                           | 22        |
| 3     | Na <sub>2</sub> CO <sub>3</sub>                     | 61        | 9     | Li <sub>2</sub> CO <sub>3</sub> | 0         |
| 4     | NaH <sub>2</sub> PO <sub>4</sub>                    | 0         | 10    | K <sub>2</sub> CO <sub>3</sub>  | 52        |
| 5     | Na <sub>2</sub> HPO <sub>4</sub>                    | 10        | 11    | Cs <sub>2</sub> CO <sub>3</sub> | 11        |
| 6     | Na <sub>2</sub> HPO <sub>4</sub> ·7H <sub>2</sub> O | 14        |       |                                 |           |

<sup>a</sup>Conditions: **1a** (0.1 mmol), Pd(OAc)<sub>2</sub> (10 mol%), **L12** (20 mol%), base (1.0 eq), TBHP (70% in water) (2.0 eq), Ac<sub>2</sub>O (2.0 eq), HFIP (1.0 mL), 60 °C, 12 h. <sup>b</sup>The yields were determined by <sup>1</sup>H NMR analysis of the crude product using CH<sub>2</sub>Br<sub>2</sub> as the internal standard.

**Table S3. Oxidant Investigation for  $\beta$ -C(sp<sup>3</sup>)-H Acetoxylation<sup>a,b</sup>**

| entry | oxidant                       | yield (%) | entry | oxidant                    | yield (%) |
|-------|-------------------------------|-----------|-------|----------------------------|-----------|
| 1     | w/o                           | 0         | 7     | (BzO) <sub>2</sub>         | 0         |
| 2     | H <sub>2</sub> O <sub>2</sub> | 0         | 8     | mCPBA                      | 0         |
| 3     | AcOO <i>t</i> -Bu             | 34        | 9     | CMHP                       | 0         |
| 4     | BzOO <i>t</i> -Bu             | 0         | 10    | TBHP (70% in water)        | 61        |
| 5     | ( <i>t</i> -BuO) <sub>2</sub> | 0         | 11    | TBHP (ca. 5.5 M in decane) | 72        |
| 6     | Lauroyl peroxide              | 0         |       |                            |           |

<sup>a</sup>Conditions: **1a** (0.1 mmol), Pd(OAc)<sub>2</sub> (10 mol%), **L12** (20 mol%), Na<sub>2</sub>CO<sub>3</sub> (1.0 eq), oxidant (2.0 eq), Ac<sub>2</sub>O (2.0 eq), HFIP (1.0 mL), 60 °C, 12 h. <sup>b</sup>The yields were determined by <sup>1</sup>H NMR analysis of the crude product using CH<sub>2</sub>Br<sub>2</sub> as the internal standard.

**Table S4. Base Loadings Investigation for  $\beta$ -C(sp<sup>3</sup>)-H Acetoxylation<sup>a,b</sup>**

| entry | x eq base | yield (%) | entry | x eq base | yield (%) |
|-------|-----------|-----------|-------|-----------|-----------|
| 1     | 0.5       | 23        | 4     | 2.0       | 44        |
| 2     | 1.0       | 61        | 5     | 2.5       | 8         |
| 3     | 1.5       | 40        | 6     | 3.0       | 12        |

<sup>a</sup>Conditions: **1a** (0.1 mmol), Pd(OAc)<sub>2</sub> (10 mol%), **L12** (20 mol%), Na<sub>2</sub>CO<sub>3</sub> (x eq), TBHP (70% in water) (2.0 eq), Ac<sub>2</sub>O (2.0 eq), HFIP (1.0 mL), 60 °C, 12 h. <sup>b</sup>The yields were determined by <sup>1</sup>H NMR analysis of the crude product using CH<sub>2</sub>Br<sub>2</sub> as the internal standard.

**Table S5. Temperature Investigation for  $\beta$ -C(sp<sup>3</sup>)-H Acetoxylation<sup>a,b</sup>**

| entry | T (°C) | yield (%) | entry | T (°C) | yield (%) |
|-------|--------|-----------|-------|--------|-----------|
| 1     | 50     | 55        | 4     | 80     | 22        |
| 2     | 60     | 61        | 5     | 90     | 21        |
| 3     | 70     | 30        |       |        |           |

<sup>a</sup>Conditions: **1a** (0.1 mmol), Pd(OAc)<sub>2</sub> (10 mol%), **L12** (20 mol%), Na<sub>2</sub>CO<sub>3</sub> (1.0 eq), TBHP (70% in water) (2.0 eq), Ac<sub>2</sub>O (2.0 eq), HFIP (1.0 mL), T °C, 12 h. <sup>b</sup>The yields were determined by <sup>1</sup>H NMR analysis of the crude product using CH<sub>2</sub>Br<sub>2</sub> as the internal standard.

**Table S6. Base Investigation for Intramolecular  $\beta$ -C(sp<sup>3</sup>)-H Acyloxylation<sup>a,b</sup>**

| entry | base                             | yield (%) | entry | base                            | yield (%) |
|-------|----------------------------------|-----------|-------|---------------------------------|-----------|
| 1     | w/o                              | 0         | 7     | NaOAc                           | 45        |
| 2     | NaHCO <sub>3</sub>               | 8         | 8     | KHCO <sub>3</sub>               | 68        |
| 3     | Na <sub>2</sub> CO <sub>3</sub>  | 32        | 9     | K <sub>2</sub> CO <sub>3</sub>  | 67        |
| 4     | NaH <sub>2</sub> PO <sub>4</sub> | 0         | 10    | K <sub>2</sub> HPO <sub>4</sub> | 45        |
| 5     | Na <sub>2</sub> HPO <sub>4</sub> | 16        | 11    | K <sub>3</sub> PO <sub>4</sub>  | 75        |
| 6     | Na <sub>3</sub> PO <sub>4</sub>  | 49        | 12    | KOAc                            | 34        |

<sup>a</sup>Conditions: **4b** (0.1 mmol), Pd(OAc)<sub>2</sub> (10 mol%), **L12** (20 mol%), base (1.0 eq), TBHP (ca. 5.5 M in decane) (2.0 eq), HFIP (1.0 mL), 60 °C, 12 h. <sup>b</sup>The yields were determined by <sup>1</sup>H NMR analysis of the crude product using CH<sub>2</sub>Br<sub>2</sub> as the internal standard.

**Table S7. Acid Anhydride Scope for  $\beta$ -C(sp<sup>3</sup>)-H Acyloxylation<sup>a,b</sup>**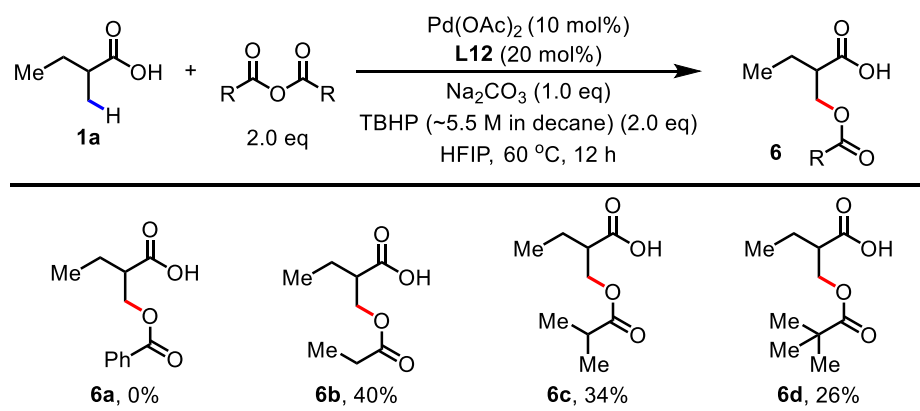

<sup>a</sup>Conditions: **1a** (0.1 mmol), Pd(OAc)<sub>2</sub> (10 mol%), **L12** (20 mol%), Na<sub>2</sub>CO<sub>3</sub> (1.0 eq), TBHP (ca. 5.5 M in decane) (2.0 eq), (RCO)<sub>2</sub>O (2.0 eq), HFIP (1.0 mL), 60 °C, 12 h. <sup>b</sup>The yields were determined by <sup>1</sup>H NMR analysis of the crude product using CH<sub>2</sub>Br<sub>2</sub> as the internal standard.

**Table S8. Selected Unsuccessful Substrates**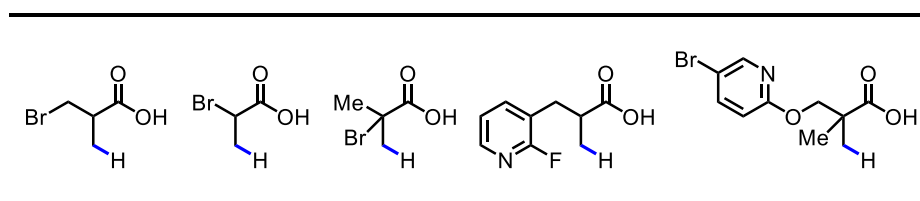



### General Procedure for $\beta$ -C(sp<sup>3</sup>)-H Acetoxylation

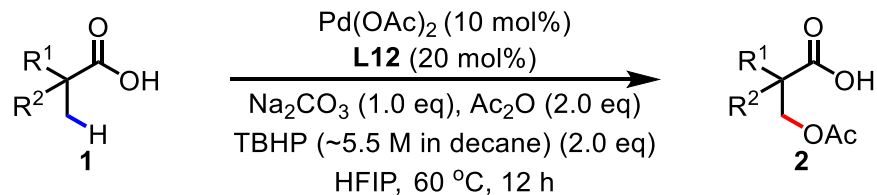

**General Procedure:** In the culture tube,  $\text{Pd(OAc)}_2$  (10 mol%, 2.2 mg), ligand **L12** (20 mol%, 3.4 mg),  $\text{Na}_2\text{CO}_3$  (1.0 eq, 10.6 mg), and carboxylic acid **1** (0.1 mmol) in order were weighed in air and placed with a magnetic stir bar. Then HFIP (1.0 mL),  $\text{Ac}_2\text{O}$  (2.0 eq, 19  $\mu\text{L}$ ), and TBHP (ca. 5.5 M in decane) (2.0 eq, 36  $\mu\text{L}$ ) were added. The reaction mixture was stirred at rt for 3 minutes, and then heated to 60 °C for 12 hours (600 rpm). After being allowed to cool to room temperature, the mixture was treated with AcOH (0.05 mL) and concentrated *in vacuo*. The resulting mixture was dissolved in MeOH (1.0 mL), treated with  $\text{TMSCHN}_2$  (2.0 eq), and concentrated *in vacuo* after 1 hour. The crude mixture was purified by pTLC or column chromatography to afford corresponding methyl esters **2**.

### Substrate Scope for $\beta$ -C(sp<sup>3</sup>)-H Acetoxylation

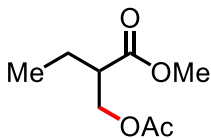

#### Methyl 2-(acetoxymethyl)butanoate (2a')

Following **General Procedure** on 0.1 mmol scale. Purification by column chromatography afforded the title compound (colorless oil, 12.5 mg, 72%). <sup>1</sup>H NMR (600 MHz, CDCl<sub>3</sub>)  $\delta$  4.25 – 4.17 (m, 2H), 3.71 (s, 3H), 2.69 – 2.60 (m, 1H), 2.04 (s, 3H), 1.73 – 1.63 (m, 1H), 1.63 – 1.56 (m, 1H), 0.94 (t,  $J = 7.5$  Hz, 3H); <sup>13</sup>C NMR (150 MHz, CDCl<sub>3</sub>)  $\delta$  174.11, 170.93, 64.43, 51.92, 46.38, 22.14, 20.98, 11.58; HRMS (ESI-TOF) Calcd for C<sub>8</sub>H<sub>14</sub>NaO<sub>4</sub> [M+Na]<sup>+</sup>: 197.0784; found: 197.0786.

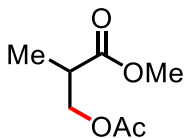

#### Methyl 3-acetoxy-2-methylpropanoate (2b')

Following **General Procedure** on 0.1 mmol scale. Purification by column chromatography afforded the title compound (colorless oil, 11.5 mg, 72%, mono/di > 20/1). The NMR data matches the reported data<sup>8</sup>.

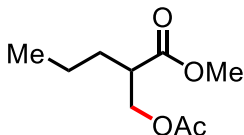

#### Methyl 2-(acetoxymethyl)pentanoate (2c')

Following **General Procedure** on 0.1 mmol scale. Purification by column chromatography afforded the title compound (colorless oil, 14.0 mg, 74%). <sup>1</sup>H NMR (600 MHz, CDCl<sub>3</sub>)  $\delta$  4.26 – 4.12 (m, 2H), 3.70 (s, 3H), 2.72 (tt,  $J = 8.4, 5.6$  Hz, 1H), 2.03 (s, 3H), 1.67 – 1.55 (m, 1H), 1.54 – 1.42 (m, 1H), 1.40 – 1.29 (m, 2H), 0.92 (t,  $J = 7.3$  Hz, 3H); <sup>13</sup>C NMR (150 MHz, CDCl<sub>3</sub>)  $\delta$  174.31, 170.91, 64.77, 51.93, 44.74, 31.03, 20.97, 20.41, 14.02; HRMS (ESI-TOF) Calcd for C<sub>9</sub>H<sub>16</sub>NaO<sub>4</sub> [M+Na]<sup>+</sup>: 211.0941; found: 211.0943.

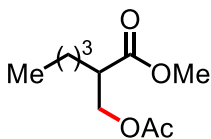

#### Methyl 2-(acetoxymethyl)hexanoate (2d')

Following **General Procedure** on 0.1 mmol scale. Purification by column chromatography afforded the title compound (colorless oil, 13.0 mg, 64%). The NMR data matches the reported data<sup>9</sup>.

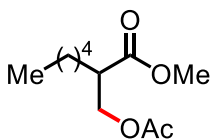

#### Methyl 2-(acetoxymethyl)heptanoate (2e')

Following **General Procedure** on 0.1 mmol scale. Purification by column chromatography afforded the title compound (colorless oil, 14.5 mg, 67%). <sup>1</sup>H NMR (600 MHz, CDCl<sub>3</sub>) δ 4.31 – 4.12 (m, 2H), 3.71 (s, 3H), 2.77 – 2.64 (m, 1H), 2.04 (s, 3H), 1.67 – 1.58 (m, 1H), 1.53 – 1.45 (m, 1H), 1.36 – 1.21 (m, 6H), 0.88 (t, *J* = 6.7 Hz, 3H); <sup>13</sup>C NMR (150 MHz, CDCl<sub>3</sub>) δ 174.34, 170.94, 64.78, 44.97, 31.73, 29.85, 28.90, 26.82, 22.54, 20.99, 14.11; HRMS (ESI-TOF) Calcd for C<sub>11</sub>H<sub>21</sub>O<sub>4</sub> [M+H]<sup>+</sup>: 217.1434; found: 217.1438.

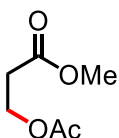

#### Methyl 3-acetoxypropanoate (2f')

Following **General Procedure** on 0.1 mmol scale. Purification by column chromatography afforded the title compound (colorless oil, 7.5 mg, 51%). The NMR data matches the reported data<sup>10</sup>.

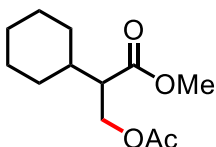

#### Methyl 3-acetoxy-2-cyclohexylpropanoate (2g')

Following **General Procedure** on 0.1 mmol scale. Purification by column chromatography afforded the title compound (colorless oil, 10.0 mg, 44%).  $^1\text{H}$  NMR (600 MHz,  $\text{CDCl}_3$ )  $\delta$  4.32 (dd,  $J = 10.8, 4.6$  Hz, 1H), 4.19 (dd,  $J = 10.8, 9.9$  Hz, 1H), 3.70 (s, 3H), 2.55 (dtd,  $J = 9.9, 4.6, 2.3$  Hz, 1H), 2.02 (s, 3H), 1.79 – 1.67 (m, 2H), 1.67 – 1.55 (m, 3H), 1.29 – 1.18 (m, 2H), 1.18 – 1.09 (m, 1H), 1.10 – 1.00 (m, 2H);  $^{13}\text{C}$  NMR (150 MHz,  $\text{CDCl}_3$ )  $\delta$  173.96, 170.95, 63.73, 51.72, 50.93, 38.02, 30.93, 30.82, 26.28, 26.25, 21.02; HRMS (ESI-TOF) Calcd for  $\text{C}_{12}\text{H}_{21}\text{O}_4$   $[\text{M}+\text{H}]^+$ : 229.1434; found: 229.1440.

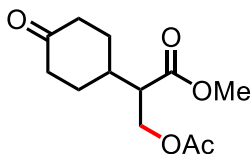

**Methyl 3-acetoxy-2-(4-oxocyclohexyl)propanoate (2h')**

Following **General Procedure** on 0.1 mmol scale. Purification by column chromatography afforded the title compound (colorless oil, 9.0 mg, 37%).  $^1\text{H}$  NMR (600 MHz,  $\text{CDCl}_3$ )  $\delta$  4.37 (dd,  $J = 11.0, 4.9$  Hz, 1H), 4.26 (dd,  $J = 11.0, 9.0$  Hz, 1H), 3.73 (s, 3H), 2.69 (ddd,  $J = 9.0, 7.4, 4.9$  Hz, 1H), 2.47 – 2.38 (m, 2H), 2.38 – 2.29 (m, 2H), 2.20 – 2.07 (m, 2H), 2.05 (s, 3H), 2.02 – 1.92 (m, 1H), 1.65 – 1.51 (m, 2H);  $^{13}\text{C}$  NMR (150 MHz,  $\text{CDCl}_3$ )  $\delta$  210.43, 173.14, 170.81, 63.36, 52.10, 49.32, 40.62, 40.60, 36.07, 30.29, 30.20, 20.98; HRMS (ESI-TOF) Calcd for  $\text{C}_{12}\text{H}_{19}\text{O}_5$   $[\text{M}+\text{H}]^+$ : 243.1227; found: 243.1229.

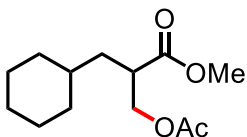

**Methyl 3-acetoxy-2-(cyclohexylmethyl)propanoate (2i')**

Following **General Procedure** on 0.1 mmol scale. Purification by column chromatography afforded the title compound (colorless oil, 13.0 mg, 54%). The NMR data matches the reported data<sup>9</sup>.

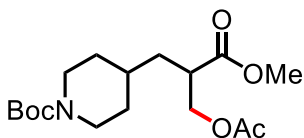

**tert-Butyl 4-(2-(acetoxyethyl)-3-methoxy-3-oxopropyl)piperidine-1-carboxylate (2j')**

Following **General Procedure** on 0.1 mmol scale. Purification by column chromatography afforded the title compound (colorless oil, 14.0 mg, 41%).  $^1\text{H}$  NMR (600 MHz,  $\text{CDCl}_3$ )  $\delta$  4.20 (dd,  $J = 10.9, 5.2$  Hz, 1H), 4.16 (dd,  $J = 10.9, 8.3$  Hz, 1H), 4.07 (br s, 2H), 3.72 (s, 3H), 2.82 (tt,  $J = 8.7, 5.3$  Hz, 1H), 2.66 (br s, 2H), 2.04 (s, 3H), 1.71 (d,  $J = 13.2$  Hz, 1H), 1.68 – 1.54 (m, 3H), 1.45 (s, 9H), 1.40 – 1.32 (m, 1H), 1.18 – 0.99 (m, 2H);  $^{13}\text{C}$  NMR (150 MHz,  $\text{CDCl}_3$ )  $\delta$  174.19, 170.90, 154.97, 79.59, 65.01, 52.14, 52.12, 43.89 (br), 42.27, 35.59, 33.96, 28.61, 20.95; HRMS (ESI-TOF) Calcd for  $\text{C}_{17}\text{H}_{30}\text{NO}_6$   $[\text{M}+\text{H}]^+$ : 344.2068; found: 344.2068.

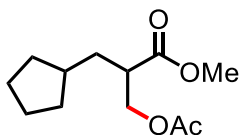

### Methyl 3-acetoxy-2-(cyclopentylmethyl)propanoate (2k')

Following **General Procedure** on 0.1 mmol scale. Purification by column chromatography afforded the title compound (colorless oil, 10.5 mg, 46%).  $^1\text{H}$  NMR (600 MHz,  $\text{CDCl}_3$ )  $\delta$  4.22 (dd,  $J = 10.9, 5.0$  Hz, 1H), 4.16 (dd,  $J = 10.9, 8.7$  Hz, 1H), 3.71 (s, 3H), 2.80 – 2.72 (m, 1H), 2.04 (s, 3H), 1.86 – 1.73 (m, 3H), 1.73 – 1.66 (m, 1H), 1.66 – 1.56 (m, 2H), 1.56 – 1.50 (m, 2H), 1.50 – 1.41 (m, 1H), 1.15 – 1.01 (m, 2H);  $^{13}\text{C}$  NMR (150 MHz,  $\text{CDCl}_3$ )  $\delta$  174.56, 170.91, 65.08, 51.96, 44.48, 38.01, 35.23, 32.87, 32.70, 25.21, 25.19, 20.98; HRMS (ESI-TOF) Calcd for  $\text{C}_{12}\text{H}_{21}\text{O}_4$   $[\text{M}+\text{H}]^+$ : 229.1434; found: 229.1439.

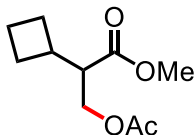

### Methyl 3-acetoxy-2-cyclobutylpropanoate (2l')

Following **General Procedure** on 0.1 mmol scale. Purification by column chromatography afforded the title compound (colorless oil, 10.0 mg, 50%).  $^1\text{H}$  NMR (600 MHz,  $\text{CDCl}_3$ )  $\delta$  4.16 (dd,  $J = 11.0, 4.6$  Hz, 1H), 4.12 (dd,  $J = 11.0, 8.7$  Hz, 1H), 3.69 (s, 3H), 2.70 (ddd,  $J = 10.1, 8.7, 4.6$  Hz, 1H), 2.55 – 2.45 (m, 1H), 2.13 – 2.05 (m, 1H), 2.05 – 1.97 (m, 4H), 1.94 – 1.71 (m, 4H);  $^{13}\text{C}$  NMR (150 MHz,  $\text{CDCl}_3$ )  $\delta$  173.27, 170.96, 63.30, 51.84, 51.02, 35.07, 27.31, 26.91, 21.00, 18.53; HRMS (ESI-TOF) Calcd for  $\text{C}_{10}\text{H}_{17}\text{O}_4$   $[\text{M}+\text{H}]^+$ : 201.1121; found: 201.1124.

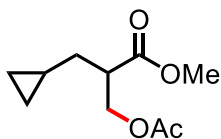

### Methyl 3-acetoxy-2-(cyclopropylmethyl)propanoate (2m')

Following **General Procedure** on 0.1 mmol scale. Purification by column chromatography afforded the title compound (colorless oil, 8.5 mg, 43%).  $^1\text{H}$  NMR (600 MHz,  $\text{CDCl}_3$ )  $\delta$  4.26 – 4.13 (m, 2H), 3.71 (s, 3H), 2.74 – 2.66 (m, 1H), 2.04 (s, 3H), 1.67 – 1.60 (m, 1H), 1.54 – 1.48 (m, 1H), 1.36 – 1.26 (m, 5H);  $^{13}\text{C}$  NMR (150 MHz,  $\text{CDCl}_3$ )  $\delta$  174.33, 170.92, 64.78, 51.95, 44.95, 29.31, 28.65, 22.65, 20.98, 13.98; HRMS (ESI-TOF) Calcd for  $\text{C}_{10}\text{H}_{17}\text{O}_4$   $[\text{M}+\text{H}]^+$ : 201.1121; found: 201.1127.

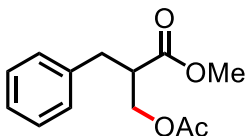

### Methyl 3-acetoxy-2-benzylpropanoate (2n')

Following **General Procedure** on 0.1 mmol scale. Purification by pTLC afforded the title compound (colorless oil, 9.5 mg, 40%).  $^1\text{H}$  NMR (600 MHz,  $\text{CDCl}_3$ )  $\delta$  7.32 – 7.26 (m, 2H), 7.24 – 7.20 (m, 1H), 7.19 – 7.13 (m, 2H), 4.25 – 4.15 (m, 2H), 3.66 (s, 3H), 3.05 – 2.97 (m, 2H), 2.88 – 2.79 (m, 1H), 2.04 (s, 3H);  $^{13}\text{C}$  NMR (150 MHz,  $\text{CDCl}_3$ )  $\delta$  173.40, 170.82, 138.05, 128.98, 128.73, 126.86, 64.01, 52.06, 46.59, 34.89, 20.94; HRMS (ESI-TOF) Calcd for  $\text{C}_{13}\text{H}_{17}\text{O}_4$   $[\text{M}+\text{H}]^+$ : 237.1121; found: 237.1122.

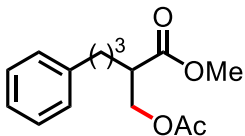

### Methyl 2-(acetoxymethyl)-5-phenylpentanoate (2o')

Following **General Procedure** on 0.1 mmol scale. Purification by pTLC afforded the title compound (colorless oil, 13.5 mg, 51%).  $^1\text{H}$  NMR (600 MHz,  $\text{CDCl}_3$ )  $\delta$  7.34 – 7.27 (m, 2H), 7.24 – 7.15 (m, 3H), 4.24 – 4.18 (m, 2H), 3.73 (s, 3H), 2.80 – 2.73 (m, 1H), 2.65 (t,  $J = 7.4$  Hz, 3H), 2.05 (s, 3H), 1.77 – 1.62 (m, 4H);  $^{13}\text{C}$  NMR (150 MHz,  $\text{CDCl}_3$ )  $\delta$  174.11, 170.89, 141.83, 128.52, 128.51, 126.05, 64.66, 52.00, 44.80, 35.73, 28.91, 28.45, 20.96; HRMS (ESI-TOF) Calcd for  $\text{C}_{15}\text{H}_{21}\text{O}_4$   $[\text{M}+\text{H}]^+$ : 265.1434; found: 265.1445.

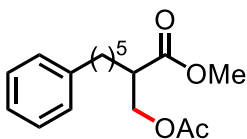

### Methyl 2-(acetoxymethyl)-7-phenylheptanoate (2p')

Following **General Procedure** on 0.1 mmol scale. Purification by pTLC afforded the title compound (colorless oil, 12.0 mg, 41%).  $^1\text{H}$  NMR (600 MHz,  $\text{CDCl}_3$ )  $\delta$  7.34 – 7.26 (m, 2H), 7.21 – 7.14 (m, 3H), 4.25 – 4.15 (m, 2H), 3.70 (s, 3H), 2.73 – 2.66 (m, 1H), 2.63 – 2.56 (m, 2H), 2.03 (s, 3H), 1.68 – 1.44 (m, 8H);  $^{13}\text{C}$  NMR (150 MHz,  $\text{CDCl}_3$ )  $\delta$  174.29, 170.94, 142.85, 128.53, 128.39, 125.76, 64.76, 51.97, 44.94, 36.04, 31.50, 29.15, 28.91, 27.09, 20.99; HRMS (ESI-TOF) Calcd for  $\text{C}_{17}\text{H}_{25}\text{O}_4$   $[\text{M}+\text{H}]^+$ : 293.1747; found: 293.1750.

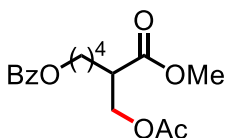

### 5-(Acetoxymethyl)-6-methoxy-6-oxohexyl benzoate (2q')

Following **General Procedure** on 0.1 mmol scale. Purification by pTLC afforded the title compound (colorless oil, 21.0 mg, 66%).  $^1\text{H}$  NMR (600 MHz,  $\text{CDCl}_3$ )  $\delta$  8.06 – 8.00 (m, 2H), 7.59 – 7.52 (m, 1H), 7.47 – 7.41 (m, 2H), 4.35 – 4.28 (m, 2H), 4.26 – 4.19 (m, 2H), 3.70 (s, 3H), 2.74 (ddt,  $J = 8.6, 7.8, 5.7$  Hz, 1H), 2.03 (s, 3H), 1.87 – 1.67 (m, 3H), 1.67 – 1.55 (m, 1H), 1.55 – 1.45 (m, 2H);  $^{13}\text{C}$  NMR (150 MHz,  $\text{CDCl}_3$ )  $\delta$  173.97, 170.88, 166.73, 133.05, 130.47, 129.67, 128.50, 64.65, 64.60, 52.03, 44.85, 28.69, 28.54, 23.79, 20.95; HRMS (ESI-TOF) Calcd for  $\text{C}_{17}\text{H}_{23}\text{O}_6$   $[\text{M}+\text{H}]^+$ : 323.1489; found: 323.1497.

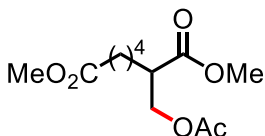

### Dimethyl 2-(acetoxymethyl)heptanedioate (2r')

Following **General Procedure** on 0.1 mmol scale. Purification by column chromatography afforded the title compound (colorless oil, 16.0 mg, 62%).  $^1\text{H}$  NMR (600 MHz,  $\text{CDCl}_3$ )  $\delta$  4.25 – 4.15 (m, 2H), 3.71 (s, 3H), 3.67 (s, 3H), 2.76 – 2.67 (m, 1H), 2.31 (t,  $J = 7.5$  Hz, 2H), 2.04 (s, 3H), 1.72 – 1.57 (m, 3H), 1.57 – 1.49 (m, 1H), 1.39 – 1.32 (m, 2H);  $^{13}\text{C}$  NMR (150

MHz, CDCl<sub>3</sub>)  $\delta$  174.02, 173.99, 170.89, 64.59, 52.02, 51.67, 44.75, 33.87, 28.53, 26.66, 24.81, 20.95; HRMS (ESI-TOF) Calcd for C<sub>12</sub>H<sub>21</sub>O<sub>6</sub> [M+H]<sup>+</sup>: 261.1333; found: 261.1335.

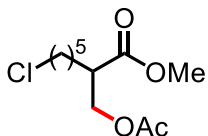

### Methyl 2-(acetoxymethyl)-7-chloroheptanoate (2s')

Following **General Procedure** on 0.1 mmol scale. Purification by column chromatography afforded the title compound (colorless oil, 13.0 mg, 52%). <sup>1</sup>H NMR (600 MHz, CDCl<sub>3</sub>)  $\delta$  4.25 – 4.16 (m, 2H), 3.72 (s, 3H), 3.52 (t, *J* = 6.6 Hz, 2H), 2.76 – 2.66 (m, 1H), 2.04 (s, 3H), 1.82 – 1.73 (m, 2H), 1.70 – 1.61 (m, 2H), 1.58 – 1.50 (m, 2H), 1.50 – 1.41 (m, 2H), 1.39 – 1.31 (m, 2H); <sup>13</sup>C NMR (150 MHz, CDCl<sub>3</sub>)  $\delta$  174.09, 170.90, 64.65, 52.03, 45.01, 44.85, 32.42, 28.73, 26.81, 26.47, 20.98; HRMS (ESI-TOF) Calcd for C<sub>11</sub>H<sub>20</sub>ClO<sub>4</sub> [M+H]<sup>+</sup>: 251.1045; found: 251.1044.

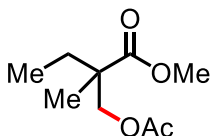

### Methyl 2-(acetoxymethyl)-2-methylbutanoate (2t')

Following **General Procedure** on 0.1 mmol scale. Purification by column chromatography afforded the title compound (colorless oil, 8.5 mg, 45%, mono/di > 20/1). <sup>1</sup>H NMR (600 MHz, CDCl<sub>3</sub>)  $\delta$  4.20 (d, *J* = 10.9 Hz, 1H), 4.08 (d, *J* = 10.9 Hz, 1H), 3.70 (s, 3H), 2.05 (s, 3H), 1.68 (dq, *J* = 13.7, 7.5 Hz, 1H), 1.53 (dq, *J* = 13.7, 7.5 Hz, 1H), 1.19 (s, 3H), 0.86 (t, *J* = 7.5 Hz, 3H); <sup>13</sup>C NMR (150 MHz, CDCl<sub>3</sub>)  $\delta$  175.65, 171.01, 68.90, 52.04, 46.67, 28.84, 20.97, 19.26, 8.72; HRMS (ESI-TOF) Calcd for C<sub>9</sub>H<sub>17</sub>O<sub>4</sub> [M+H]<sup>+</sup>: 189.1121; found: 189.1124.

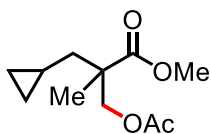

### Methyl 3-acetoxy-2-(cyclopropylmethyl)-2-methylpropanoate (2u')

Following **General Procedure** on 0.1 mmol scale. Purification by column chromatography afforded the title compound (colorless oil, 7.0 mg, 33%, mono/di > 20/1). <sup>1</sup>H NMR (600



MHz, CDCl<sub>3</sub>)  $\delta$  4.29 (d,  $J$  = 10.8 Hz, 1H), 4.17 (d,  $J$  = 10.8 Hz, 1H), 3.73 (s, 3H), 2.07 (s, 3H), 1.57 – 1.48 (m, 2H), 1.30 (s, 3H), 0.70 – 0.62 (m, 1H), 0.54 – 0.41 (m, 2H), 0.12 – 0.04 (m, 2H); <sup>13</sup>C NMR (150 MHz, CDCl<sub>3</sub>)  $\delta$  175.77, 171.02, 68.94, 52.03, 46.93, 40.95, 21.01, 20.08, 6.37, 4.59, 4.43.

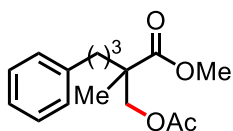

### Methyl 2-(acetoxymethyl)-2-methyl-5-phenylpentanoate (2v')

Following **General Procedure** on 0.1 mmol scale. Purification by column chromatography afforded the title compound (colorless oil, 12.0 mg, 43%, mono/di > 20/1). <sup>1</sup>H NMR (600 MHz, CDCl<sub>3</sub>)  $\delta$  7.34 – 7.27 (m, 2H), 7.24 – 7.14 (m, 3H), 4.20 (d,  $J$  = 10.9 Hz, 1H), 4.09 (d,  $J$  = 10.9 Hz, 1H), 3.70 (s, 3H), 2.62 (t,  $J$  = 7.0 Hz, 2H), 2.04 (s, 3H), 1.77 – 1.65 (m, 1H), 1.65 – 1.60 (m, 1H), 1.61 – 1.51 (m, 2H), 1.21 (s, 3H); <sup>13</sup>C NMR (150 MHz, CDCl<sub>3</sub>)  $\delta$  175.60, 170.96, 141.92, 128.49, 126.03, 68.98, 52.10, 46.24, 36.20, 35.55, 26.10, 20.95, 19.80 1 carbon signal was not assigned due to overlaps).

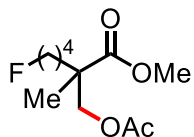

### Methyl 2-(acetoxymethyl)-6-fluoro-2-methylhexanoate (2w')

Following **General Procedure** on 0.1 mmol scale. Purification by column chromatography afforded the title compound (colorless oil, 12.0 mg, 51%, mono/di > 20/1). <sup>1</sup>H NMR (600 MHz, CDCl<sub>3</sub>)  $\delta$  4.43 (dt,  $J$  = 47.3, 6.0 Hz, 2H), 4.19 (d,  $J$  = 10.9 Hz, 1H), 4.09 (d,  $J$  = 10.9 Hz, 1H), 3.70 (s, 3H), 2.05 (s, 3H), 1.73 – 1.62 (m, 3H), 1.55 – 1.48 (m, 1H), 1.45 – 1.36 (m, 1H), 1.36 – 1.28 (m, 1H), 1.21 (s, 3H); <sup>13</sup>C NMR (150 MHz, CDCl<sub>3</sub>)  $\delta$  175.51, 170.95, 83.81 (d,  $J$  = 164.6 Hz), 68.97, 52.17, 46.28, 35.59, 30.84 (d,  $J$  = 19.8 Hz), 20.96, 20.27 (d,  $J$  = 5.2 Hz), 19.76.

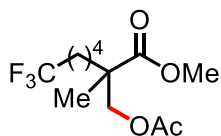

### Methyl 2-(acetoxymethyl)-7,7,7-trifluoro-2-methylheptanoate (2x')

Following **General Procedure** on 0.1 mmol scale. Purification by column chromatography afforded the title compound (colorless oil, 11.5 mg, 40%, mono/di > 20/1).  $^1\text{H}$  NMR (600 MHz,  $\text{CDCl}_3$ )  $\delta$  4.20 (d,  $J = 10.9$  Hz, 1H), 4.11 (d,  $J = 10.9$  Hz, 1H), 3.72 (s, 3H), 2.13 – 2.08 (m, 2H), 2.08 (s, 3H), 1.72 – 1.64 (m, 2H), 1.56 – 1.48 (m, 2H), 1.42 – 1.28 (m, 2H), 1.23 (s, 3H);  $^{13}\text{C}$  NMR (150 MHz,  $\text{CDCl}_3$ )  $\delta$  175.39, 170.92, 127.20 (q,  $J = 276.3$  Hz), 68.87, 52.19, 46.18, 35.51, 33.63 (q,  $J = 28.6$  Hz), 23.55, 22.38 (q,  $J = 3.2$  Hz), 20.96, 19.84.

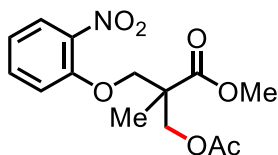

### Methyl 3-acetoxy-2-methyl-2-((2-nitrophenoxy)methyl)propanoate (2y')

Following **General Procedure** on 0.1 mmol scale. Purification by pTLC afforded the title compound (colorless oil, 17.0 mg, 55%, mono/di > 20/1).  $^1\text{H}$  NMR (600 MHz,  $\text{CDCl}_3$ )  $\delta$  7.87 (dd,  $J = 8.3, 1.7$  Hz, 1H), 7.54 (ddd,  $J = 8.3, 7.5, 1.7$  Hz, 1H), 7.12 (dd,  $J = 8.5, 1.1$  Hz, 1H), 7.06 (ddd,  $J = 8.5, 7.5, 1.1$  Hz, 1H), 4.42 (d,  $J = 11.1$  Hz, 1H), 4.34 (d,  $J = 11.1$  Hz, 1H), 4.30 (d,  $J = 8.7$  Hz, 1H), 4.20 (d,  $J = 8.7$  Hz, 1H), 3.75 (s, 3H), 2.03 (s, 3H), 1.38 (s, 3H);  $^{13}\text{C}$  NMR (150 MHz,  $\text{CDCl}_3$ )  $\delta$  173.57, 170.50, 152.15, 134.37, 125.98, 120.98, 114.84, 70.73, 65.48, 52.60, 47.18, 20.89, 18.03 (1 carbon signal was not assigned due to overlaps); HRMS (ESI-TOF) Calcd for  $\text{C}_{14}\text{H}_{18}\text{NO}_7$   $[\text{M}+\text{H}]^+$ : 312.1078; found: 312.1085.

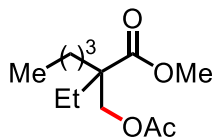

### Methyl 2-(acetoxymethyl)-2-ethylhexanoate (2z')

Following **General Procedure** on 0.1 mmol scale. Purification by column chromatography afforded the title compound (colorless oil, 12.0 mg, 52%).  $^1\text{H}$  NMR (600 MHz,  $\text{CDCl}_3$ )  $\delta$  4.20 (d,  $J = 11.3$  Hz, 1H), 4.19 (d,  $J = 11.3$  Hz, 1H), 3.69 (s, 3H), 2.04 (s, 3H), 1.65 (qd,  $J = 7.5, 3.2$  Hz, 2H), 1.61 – 1.54 (m, 2H), 1.29 (q,  $J = 7.5$  Hz, 2H), 1.22 – 1.09 (m, 2H), 0.89 (t,  $J = 7.3$  Hz, 3H), 0.81 (t,  $J = 7.5$  Hz, 3H);  $^{13}\text{C}$  NMR (150 MHz,  $\text{CDCl}_3$ )  $\delta$  175.45, 170.97, 64.87, 51.86, 49.80, 32.64, 26.19, 25.96, 23.22, 21.00, 14.06, 8.48; HRMS (ESI-TOF) Calcd for  $\text{C}_{12}\text{H}_{23}\text{O}_4$   $[\text{M}+\text{H}]^+$ : 231.1591; found: 231.1589.

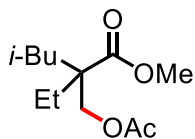

**Methyl 2-(acetoxymethyl)-2-ethyl-4-methylpentanoate (2aa')**

Following **General Procedure** on 0.1 mmol scale. Purification by column chromatography afforded the title compound (colorless oil, 12.5 mg, 54%).  $^1\text{H}$  NMR (600 MHz,  $\text{CDCl}_3$ )  $\delta$  4.24 (d,  $J = 11.4$  Hz, 1H), 4.19 (d,  $J = 11.4$  Hz, 1H), 3.68 (s, 3H), 2.05 (s, 3H), 1.75 – 1.51 (m, 5H), 0.86 (d,  $J = 6.6$  Hz, 3H), 0.84 (d,  $J = 6.6$  Hz, 3H), 0.80 (t,  $J = 7.5$  Hz, 3H);  $^{13}\text{C}$  NMR (150 MHz,  $\text{CDCl}_3$ )  $\delta$  175.85, 170.99, 64.33, 51.73, 49.07, 42.59, 26.80, 24.35, 24.19, 23.49, 21.00, 8.39; HRMS (ESI-TOF) Calcd for  $\text{C}_{12}\text{H}_{23}\text{O}_4$   $[\text{M}+\text{H}]^+$ : 231.1591; found: 231.1593.

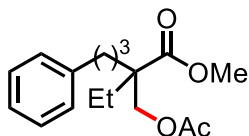

**Methyl 2-(acetoxymethyl)-2-ethyl-5-phenylpentanoate (2ab')**

Following **General Procedure** on 0.1 mmol scale. Purification by pTLC afforded the title compound (colorless oil, 16.0 mg, 55%).  $^1\text{H}$  NMR (600 MHz,  $\text{CDCl}_3$ )  $\delta$  7.31 – 7.24 (m, 2H), 7.20 – 7.12 (m, 3H), 4.22 – 4.13 (m, 2H), 3.67 (s, 3H), 2.59 (t,  $J = 7.7$  Hz, 2H), 1.99 (s, 3H), 1.68 – 1.57 (m, 4H), 1.55 – 1.45 (m, 2H), 0.78 (t,  $J = 7.5$  Hz, 3H);  $^{13}\text{C}$  NMR (150 MHz,  $\text{CDCl}_3$ )  $\delta$  175.25, 170.91, 142.01, 128.50, 128.45, 125.98, 64.72, 51.90, 49.79, 36.19, 32.32, 26.06, 25.74, 20.94, 8.46; HRMS (ESI-TOF) Calcd for  $\text{C}_{17}\text{H}_{24}\text{NaO}_4$   $[\text{M}+\text{Na}]^+$ : 315.1567; found: 315.1575.

### Scale-up Reaction for $\beta$ -C(sp<sup>3</sup>)-H Acetoxylation

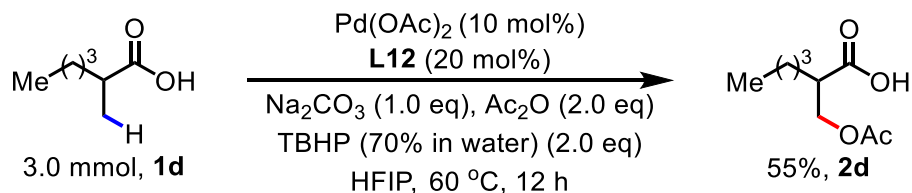

In the sealed tube, Pd(OAc)<sub>2</sub> (10 mol%, 66.0 mg), ligand **L12** (20 mol%, 102.0 mg), and Na<sub>2</sub>CO<sub>3</sub> (1.0 eq, 318.0 mg) in order were weighed in air and placed with a magnetic stir bar. Then HFIP (30.0 mL), carboxylic acid **1d** (3.0 mmol, 0.43 mL), Ac<sub>2</sub>O (2.0 eq, 0.57 mL), and TBHP (70% in water) (2.0 eq, 0.83 mL) were added. The reaction mixture was stirred at rt for 3 minutes, and then heated to 60 °C for 24 hours (600 rpm). After being allowed to cool to room temperature, the mixture was treated with AcOH (1.0 mL) and concentrated *in vacuo*. The crude mixture was purified by column chromatography to afford corresponding  $\beta$ -acetoxylation free carboxylic acid **2d** (55%, 310 mg).

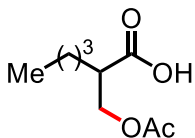

### 2-(Acetoxymethyl)hexanoic acid (**2d**)

<sup>1</sup>H NMR (600 MHz, CDCl<sub>3</sub>)  $\delta$  4.25 (dd,  $J = 11.0, 5.2$  Hz, 1H), 4.21 (dd,  $J = 11.0, 8.3$  Hz, 1H), 2.78 – 2.70 (m, 1H), 2.06 (s, 3H), 1.71 – 1.64 (m, 1H), 1.60 – 1.51 (m, 1H), 1.41 – 1.29 (m, 4H), 0.91 (t,  $J = 7.0$  Hz, 3H); <sup>13</sup>C NMR (150 MHz, CDCl<sub>3</sub>)  $\delta$  178.50, 171.01, 64.46, 44.63, 29.21, 28.47, 22.64, 20.98, 13.95; HRMS (ESI-TOF) Calcd for C<sub>9</sub>H<sub>17</sub>O<sub>4</sub> [M+H]<sup>+</sup>: 189.1121; found: 189.1130.

### Experimental Procedure for Deprotection of Acetyl Group

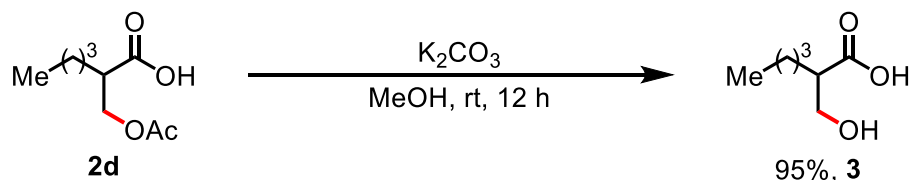

In the culture tube, **2d** (0.1 mmol, 18.8 mg) and  $K_2CO_3$  (2.0 eq, 27.6 mg) were weighed in air and placed with a magnetic stir bar. Then MeOH (1.0 mL) was added. The reaction mixture was stirred at rt for 12 hours. The resulting mixture was diluted with EA, washed with saturated  $NH_4Cl$  solution, dried with  $MgSO_4$ , and concentrated *in vacuo* to afford pure  $\beta$ -hydroxy acid **3** (95%, 14.0 mg).

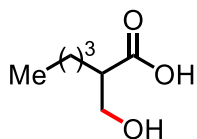

#### 2-(Hydroxymethyl)hexanoic acid (**3**)

$^1H$  NMR (600 MHz,  $CDCl_3$ )  $\delta$  6.31 (br s, 2H), 3.86 – 3.74 (m, 2H), 2.67 – 2.56 (m, 1H), 1.72 – 1.61 (m, 1H), 1.59 – 1.49 (m, 1H), 1.41 – 1.30 (m, 4H), 0.91 (t,  $J = 7.0$  Hz, 3H);  $^{13}C$  NMR (150 MHz,  $CDCl_3$ )  $\delta$  180.37, 63.14, 47.68, 29.42, 28.10, 22.70, 13.94; HRMS (ESI-TOF) Calcd for  $C_7H_{15}O_3$   $[M+H]^+$ : 147.1016; found: 147.1018.

### General Procedure for Intramolecular $\beta$ -C(sp<sup>3</sup>)-H Acyloxylation

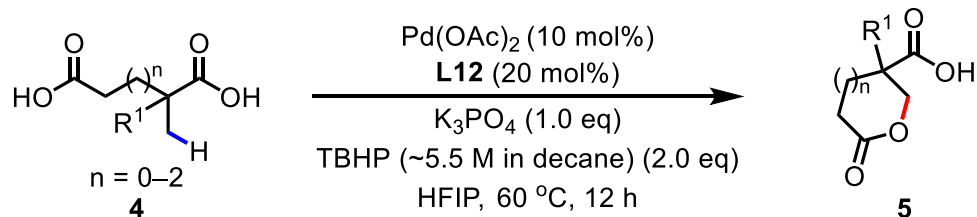

**General Procedure:** In the culture tube,  $\text{Pd}(\text{OAc})_2$  (10 mol%, 2.2 mg), ligand **L12** (20 mol%, 3.4 mg),  $\text{Na}_2\text{CO}_3$  (1.0 eq, 10.6 mg), and carboxylic acid **4** (0.1 mmol) in order were weighed in air and placed with a magnetic stir bar. Then HFIP (1.0 mL) and TBHP (ca. 5.5 M in decane) (2.0 eq, 36  $\mu\text{L}$ ) were added. The reaction mixture was stirred at rt for 3 minutes, and then heated to 60 °C for 12 hours (600 rpm). After being allowed to cool to room temperature, the mixture was treated with AcOH (0.05 mL) and concentrated *in vacuo*. The resulting mixture was dissolved in MeOH (1.0 mL), treated with  $\text{TMSCHN}_2$  (2.0 eq), and concentrated *in vacuo* after 1 hour. The crude mixture was purified by column chromatography to afford corresponding methyl esters **5'**.

### Substrate Scope for $\beta$ -C(sp<sup>3</sup>)-H Intramolecular $\beta$ -C(sp<sup>3</sup>)-H Acyloxylation

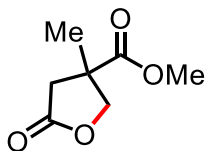

#### Methyl 3-methyl-5-oxotetrahydrofuran-3-carboxylate (5a')

Following **General Procedure** on 0.1 mmol scale. Purification by column chromatography afforded the title compound (colorless oil, 8.0 mg, 51%). <sup>1</sup>H NMR (600 MHz, CDCl<sub>3</sub>)  $\delta$  4.55 (d,  $J$  = 9.3 Hz, 1H), 4.08 (d,  $J$  = 9.3 Hz, 1H), 3.77 (s, 3H), 3.06 (d,  $J$  = 17.6 Hz, 1H), 2.43 (d,  $J$  = 17.6 Hz, 1H), 1.47 (s, 3H); <sup>13</sup>C NMR (150 MHz, CDCl<sub>3</sub>)  $\delta$  175.06, 173.98, 75.43, 53.06, 46.41, 39.14, 22.75; HRMS (ESI-TOF) Calcd for C<sub>7</sub>H<sub>11</sub>O<sub>4</sub> [M+H]<sup>+</sup>: 159.0652; found: 159.0660.

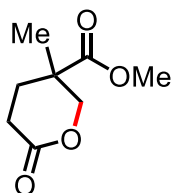

#### Methyl 3-methyl-6-oxotetrahydro-2H-pyran-3-carboxylate (5b')

Following **General Procedure** on 0.1 mmol scale. Purification by column chromatography afforded the title compound (colorless oil, 12.5 mg, 73%). The NMR data matches the reported data<sup>11</sup>.

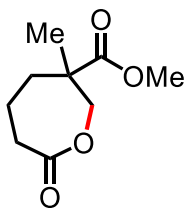

#### Methyl 3-methyl-7-oxooxepane-3-carboxylate (5c')

Following **General Procedure** on 0.1 mmol scale. Purification by column chromatography afforded the title compound (colorless oil, 11.0 mg, 59%). <sup>1</sup>H NMR (600 MHz, CDCl<sub>3</sub>)  $\delta$  4.41 (d,  $J$  = 12.8 Hz, 1H), 4.14 (d,  $J$  = 12.8 Hz, 1H), 3.74 (s, 3H), 2.71 – 2.60 (m, 2H), 2.24 – 2.16 (m, 1H), 1.97 – 1.87 (m, 1H), 1.87 – 1.79 (m, 1H), 1.65 – 1.59 (m, 1H), 1.23 (s, 3H);

$^{13}\text{C}$  NMR (150 MHz,  $\text{CDCl}_3$ )  $\delta$  175.04, 174.71, 72.63, 68.06, 52.48, 45.89, 37.67, 33.88, 19.45; HRMS (ESI-TOF) Calcd for  $\text{C}_9\text{H}_{15}\text{O}_4$   $[\text{M}+\text{H}]^+$ : 187.0965; found: 187.0964.

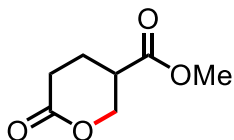

**Methyl 6-oxotetrahydro-2H-pyran-3-carboxylate (5d')**

Following **General Procedure** on 0.1 mmol scale. Purification by column chromatography afforded the title compound (colorless oil, 8.5 mg, 54%). The NMR data matches the reported data<sup>12</sup>.



## Reference:

1. H. Park, N. Chekshin, P.-X. Shen, J.-Q. Yu, Ligand-enabled, palladium-catalyzed  $\beta$ -C(sp<sup>3</sup>)-H arylation of Weinreb amides. *ACS Catal.* **8**, 9292–9297 (2018).
2. P.-X. Shen, L. Hu, Q. Shao, K. Hong, J.-Q. Yu, Pd(II)-catalyzed enantioselective C(sp<sup>3</sup>)-H arylation of free carboxylic acids. *J. Am. Chem. Soc.* **140**, 6545–6549 (2018).
3. E. Fillion, A. M. Dumas, Synthesis of fused 4,5-disubstituted indole ring systems by intramolecular Friedel–Crafts acylation of 4-substituted indoles. *J. Org. Chem.* **73**, 2920–2923 (2008).
4. K. Hong, H. Park, J.-Q. Yu, Methylene C(sp<sup>3</sup>)-H arylation of aliphatic ketones using a transient directing group. *ACS Catal.* **7**, 6938–6941 (2017).
5. G. Naturale, M. Lamblin, C. Commandeur, F.-X. Felpin, J. Dessolin, Direct C–H alkylation of naphthoquinones with amino acids through a revisited Kochi–Anderson radical decarboxylation: trends in reactivity and applications. *Eur. J. Org. Chem.* 5774–5788 (2012).
6. J. M. Dener, P. P. Fantauzzi, T. A. Kshirsagar, D. E. Kelly, A. B. Wolfe, Large-scale syntheses of Fmoc-protected non-proteogenic amino acids: useful building blocks for combinatorial libraries. *Org. Process Res. Dev.* **54**, 445–449 (2001).
7. F. Fülöp, M. Palkó, J. Kámán, L. Lázár, R. Sillanpää, Synthesis of all four enantiomers of 1-aminoindane-2-carboxylic acid, a new cispentacin benzologue. *Tetrahedron: Asymmetry* **11**, 4179–4187 (2000).
8. K. L. Morley, V. P. Magloire, C. Guérard, R. J. Kazlauskas, Parallel synthesis of an ester library for substrate mapping of esterases and lipases. *Tetrahedron: Asymmetry* **15**, 3005–3009 (2004).
9. G. Sartori, R. Maggi, Carboxylic acid esters: product subclass 16: 3-heteroatom-substituted alkanolic acid esters. *Science of Synthesis* **20b**, 1375–1420 (2006).
10. M. J. Fink, M. D. Mihovilovic, Non-hazardous Baeyer–Villiger oxidation of levulinic acid derivatives: alternative renewable access to 3-hydroxypropionates. *Chem. Commun.* **51**, 2874–2877 (2015).

11. T. Mitsudo, N. Suzuki, T. Kobayashi, T. Kondo, Ru<sub>3</sub>(CO)<sub>12</sub>/1,10-phenanthroline-catalyzed hydroformylation of styrene and acrylic esters. *J. Mol. Catal. A* **137**, 253–262 (1999).
12. G. W. Fahnhorst, D. E. Stasiw, W. B. Tolman, T. R. Hoyer, Isomerization of linear to hyperbranched polymers: two isomeric lactones converge via metastable isostructural polyesters to a highly branched analogue. *ACS Macro Lett.* **7**, 1144–1148 (2018).

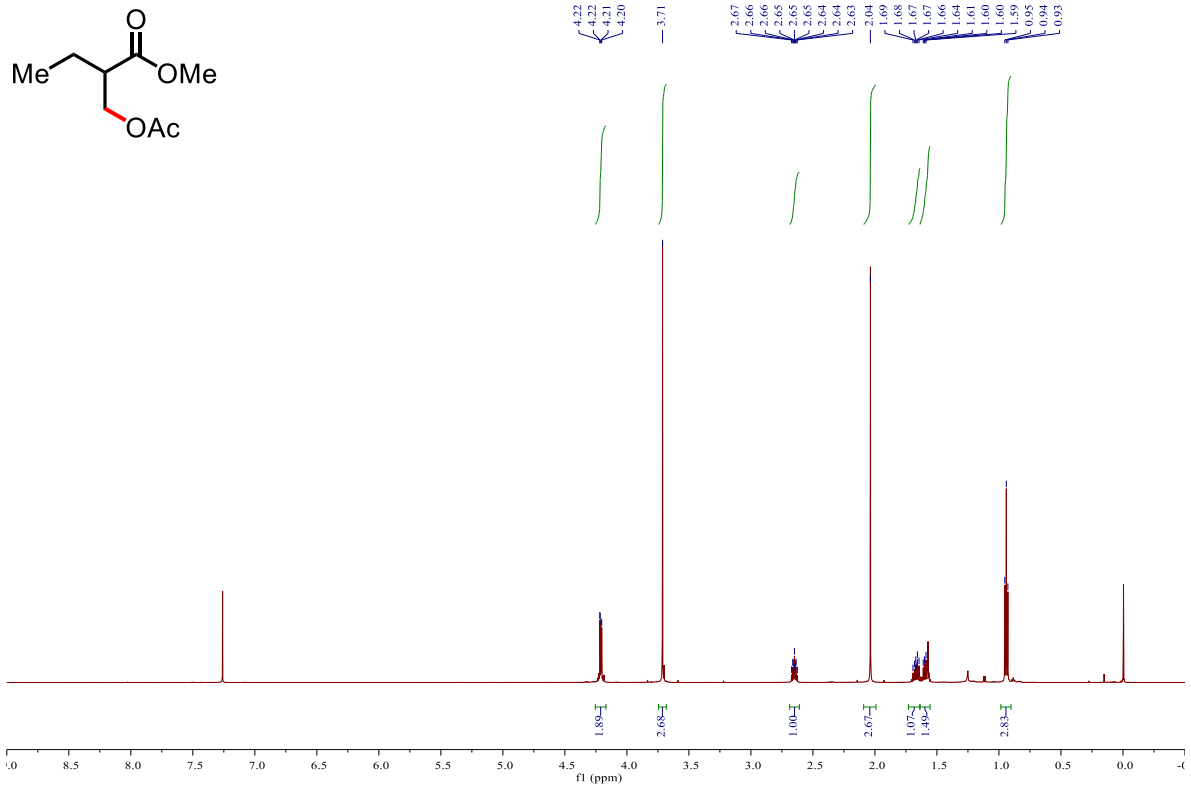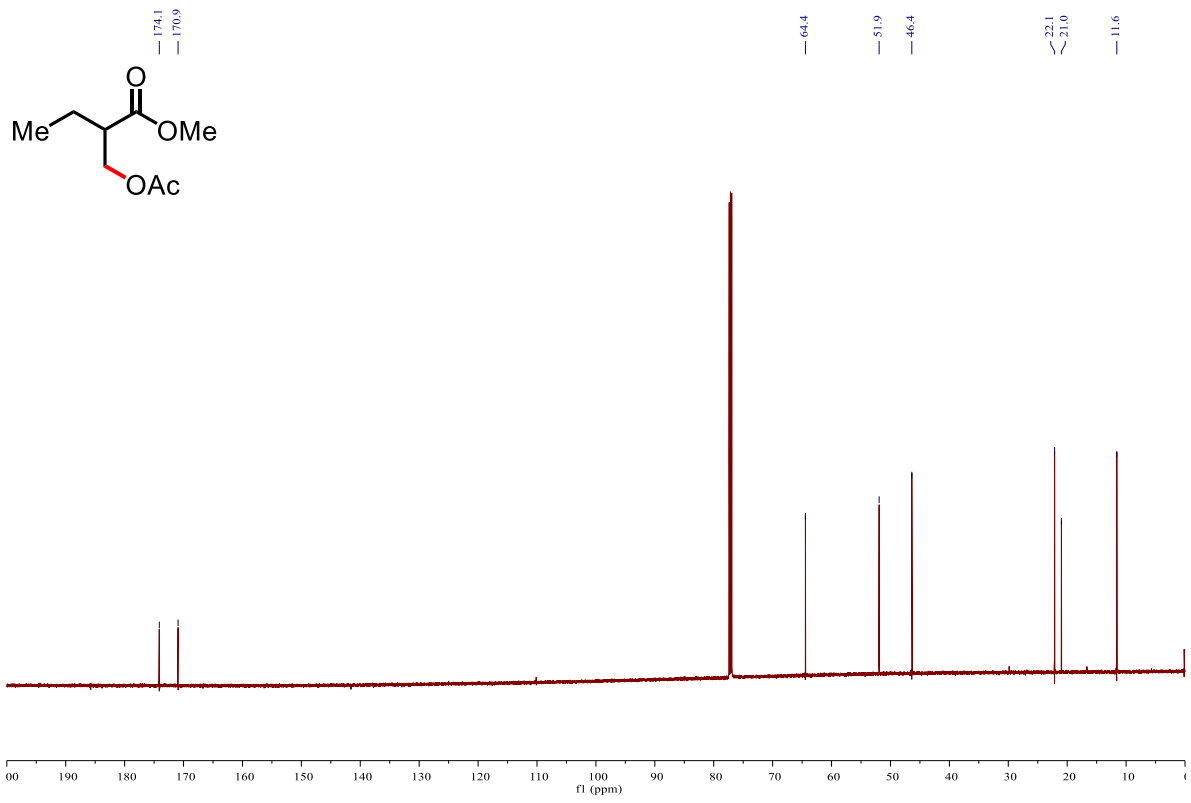

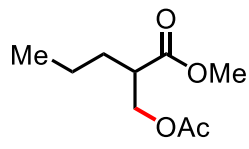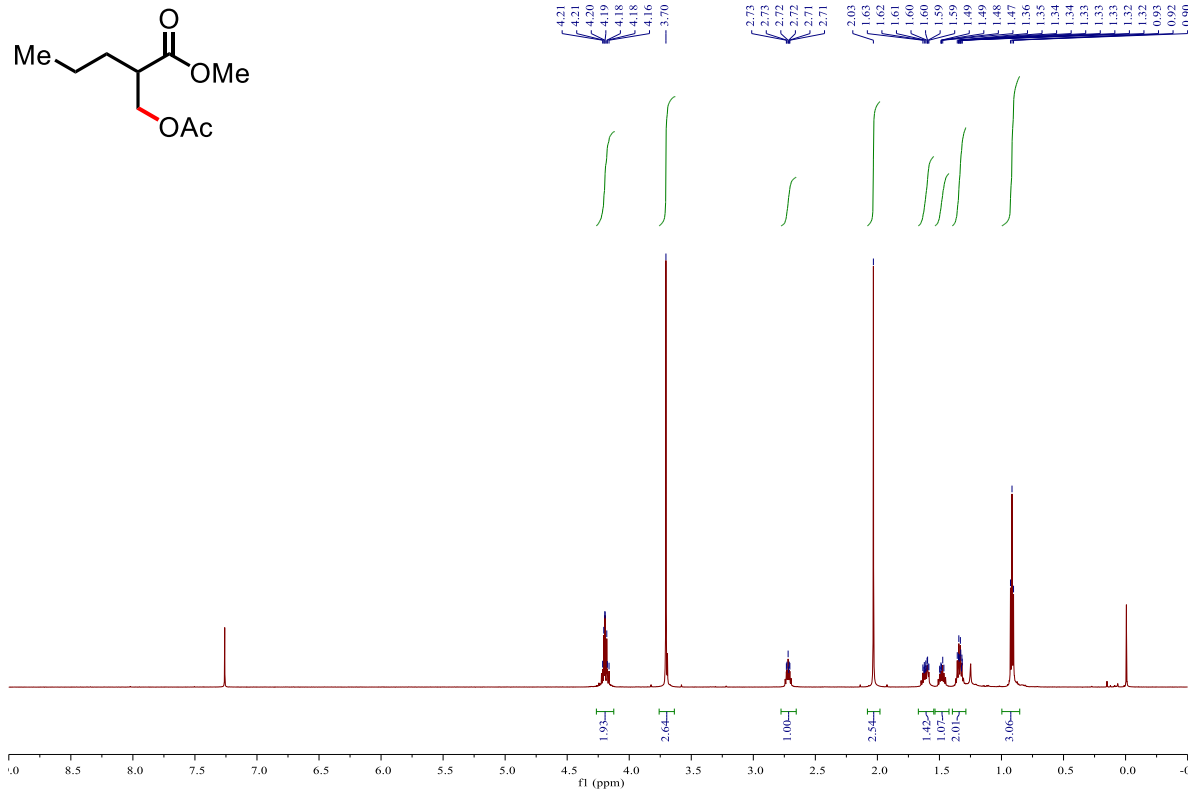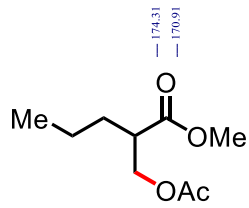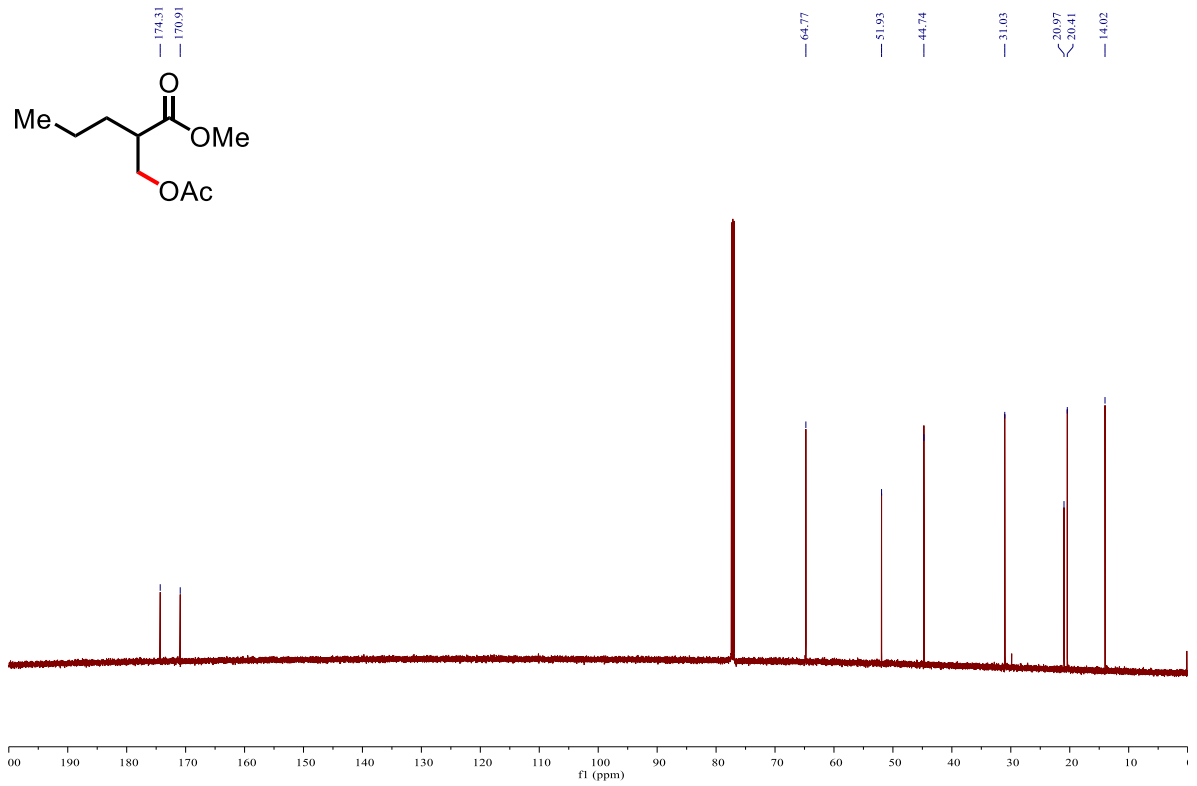

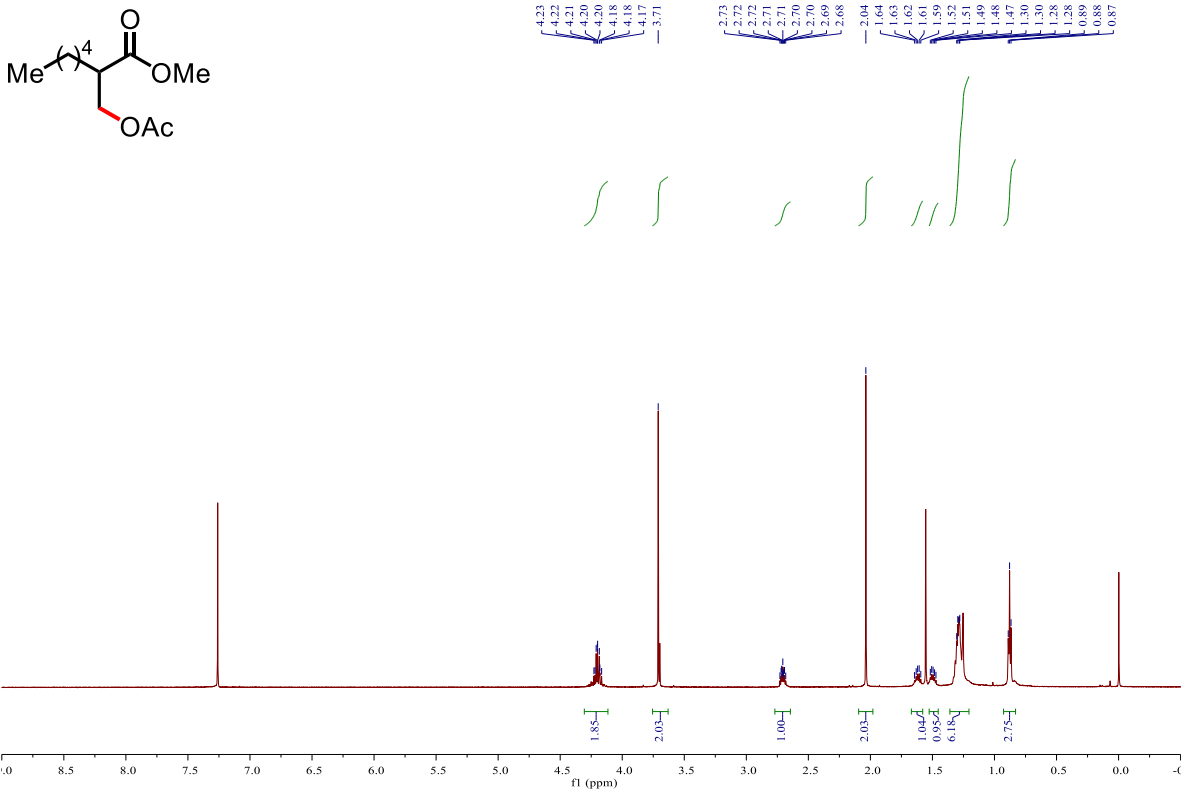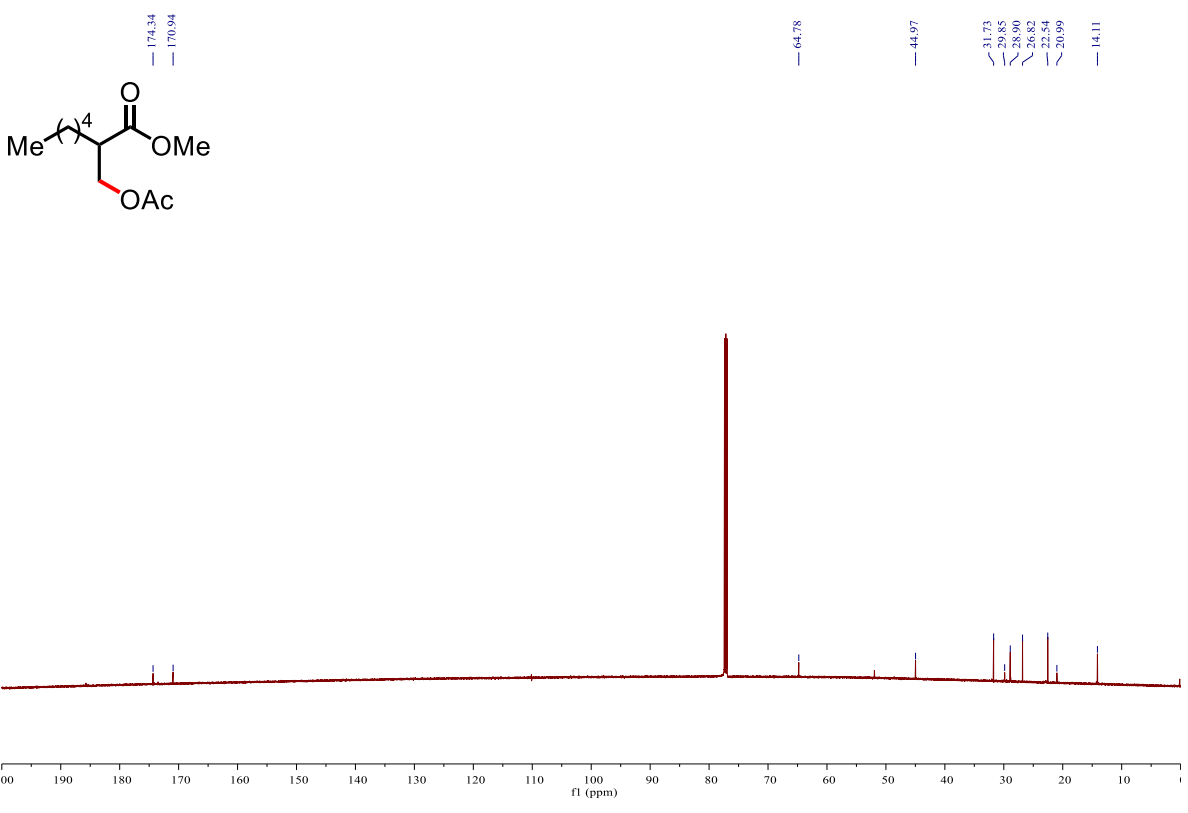

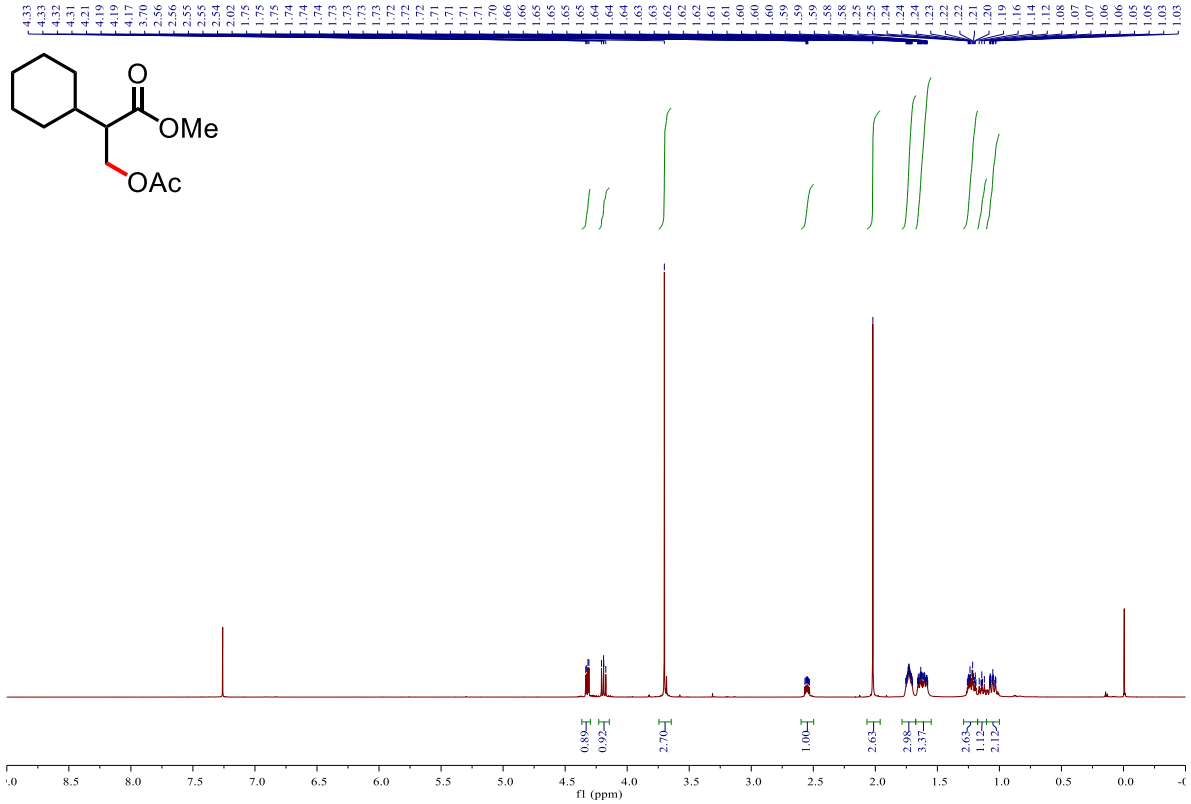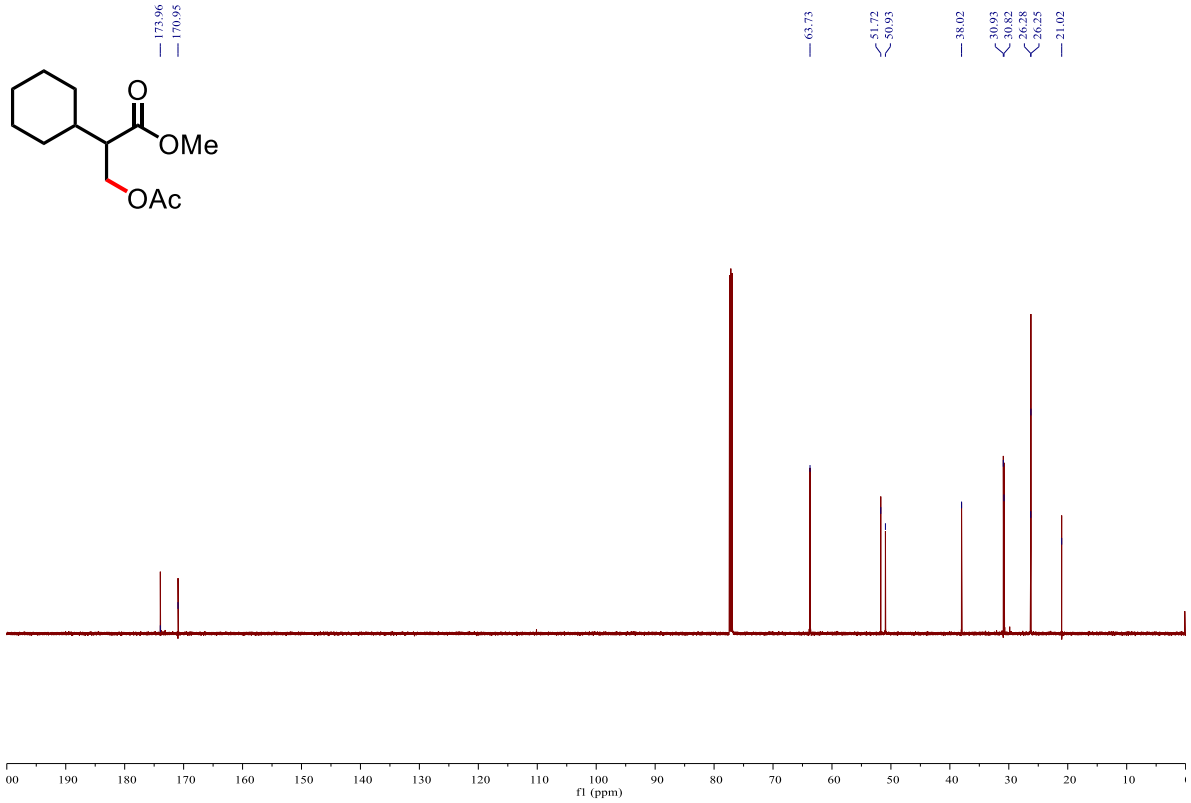

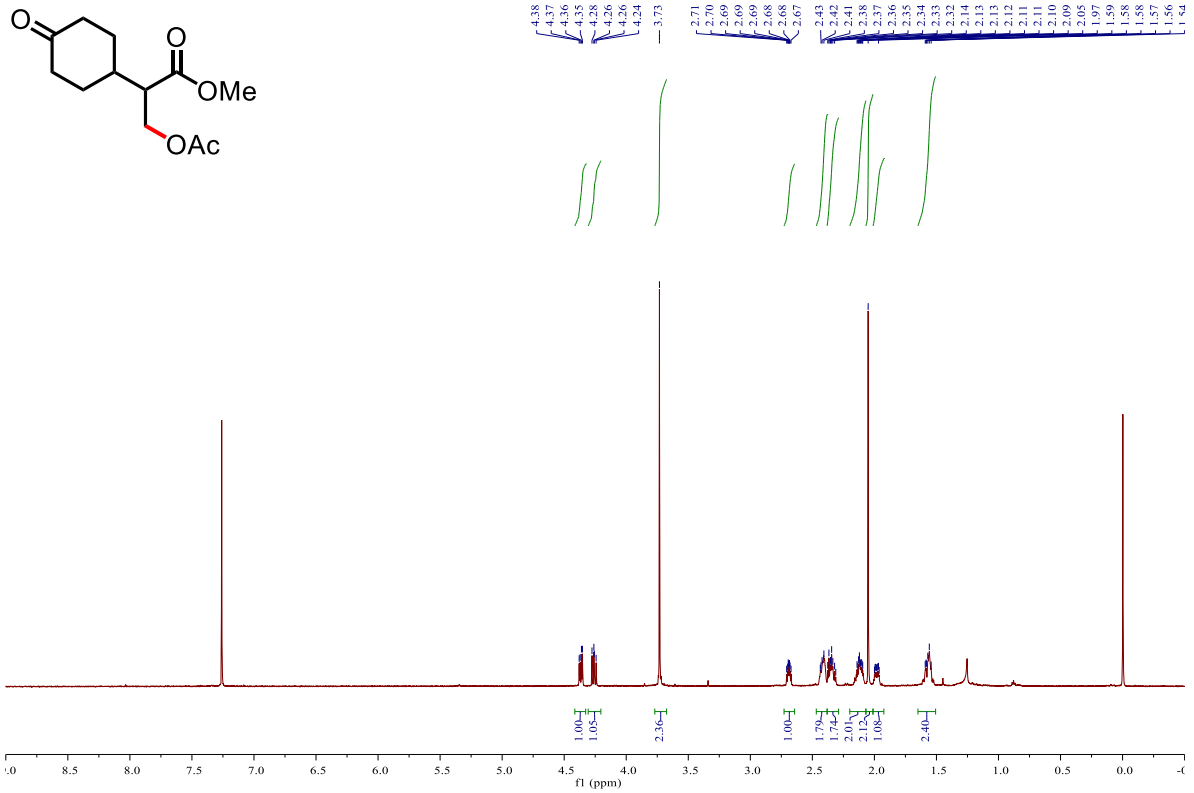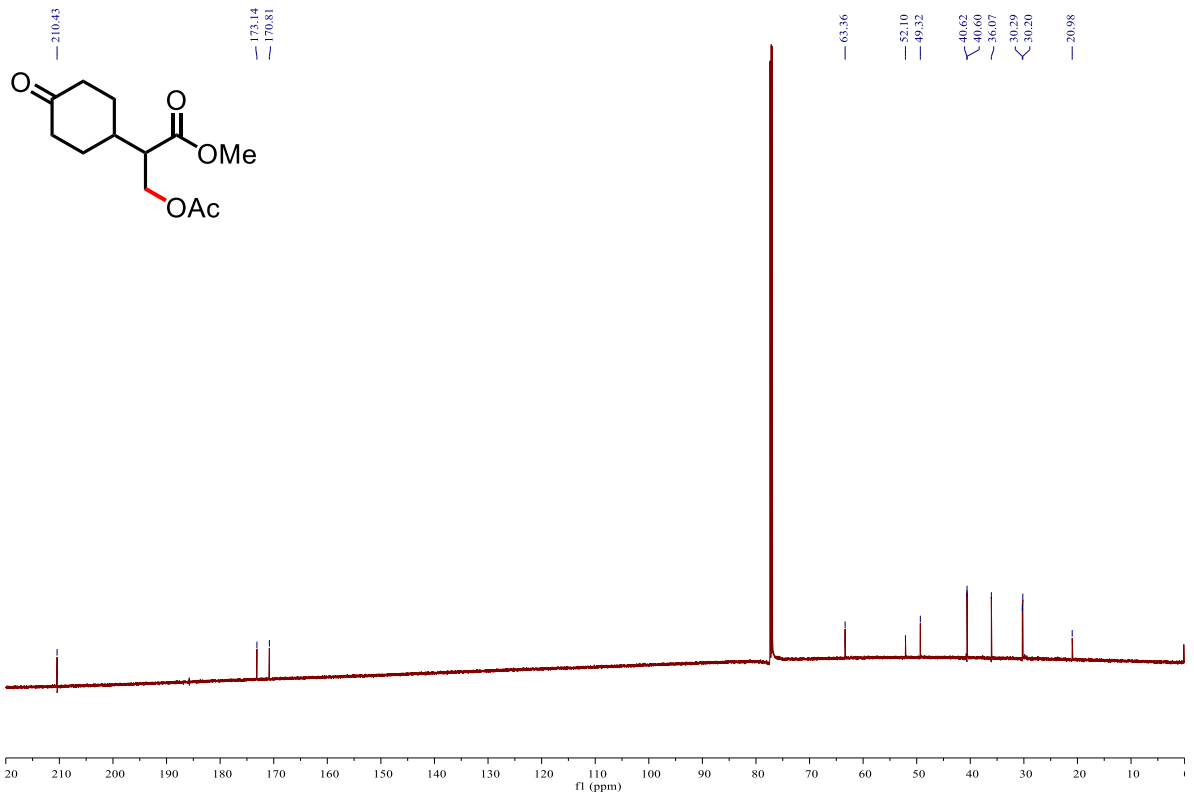

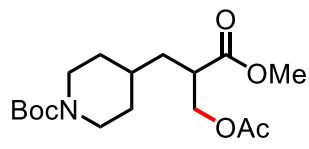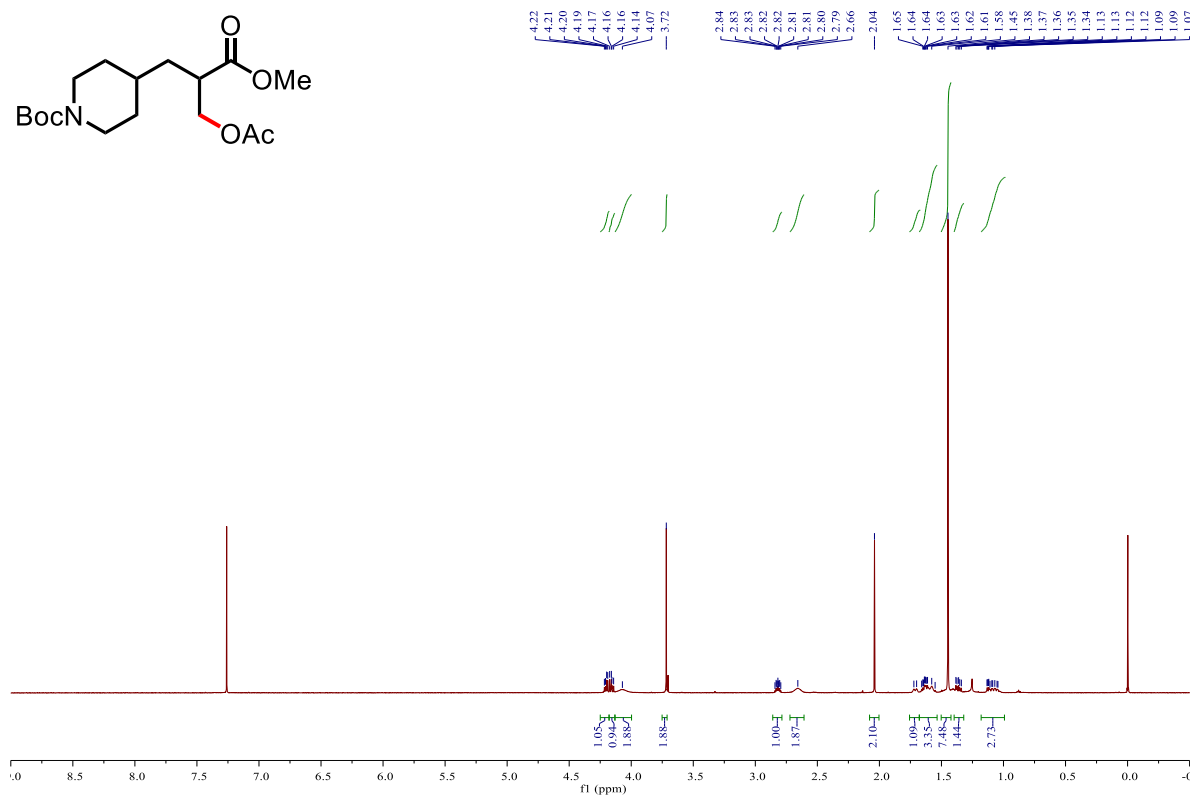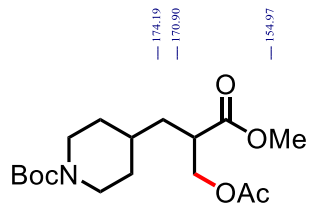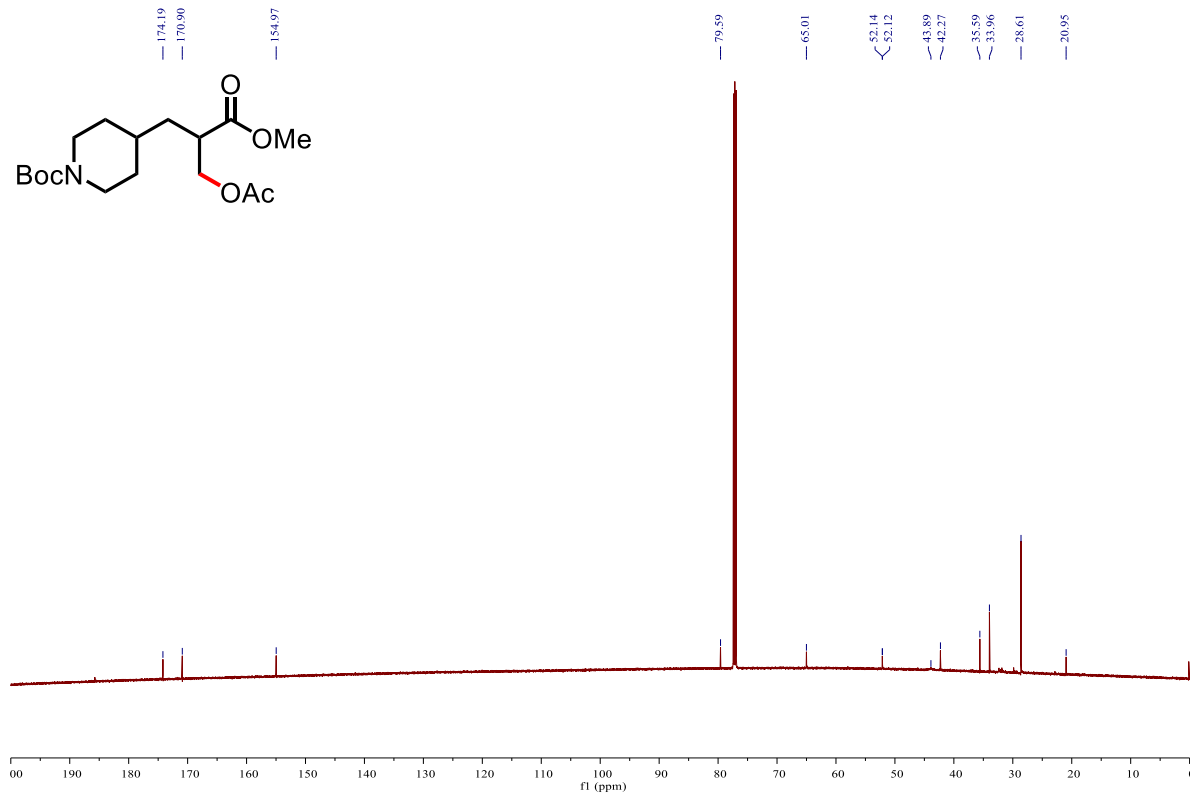



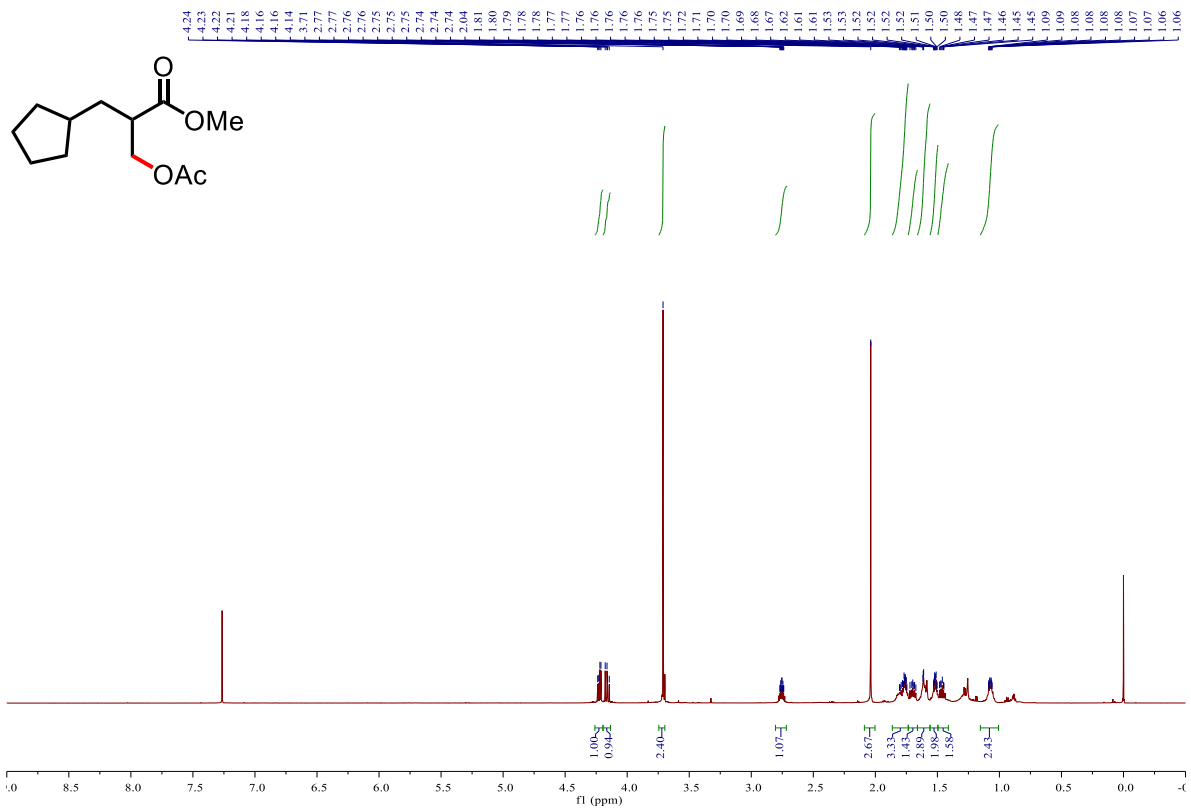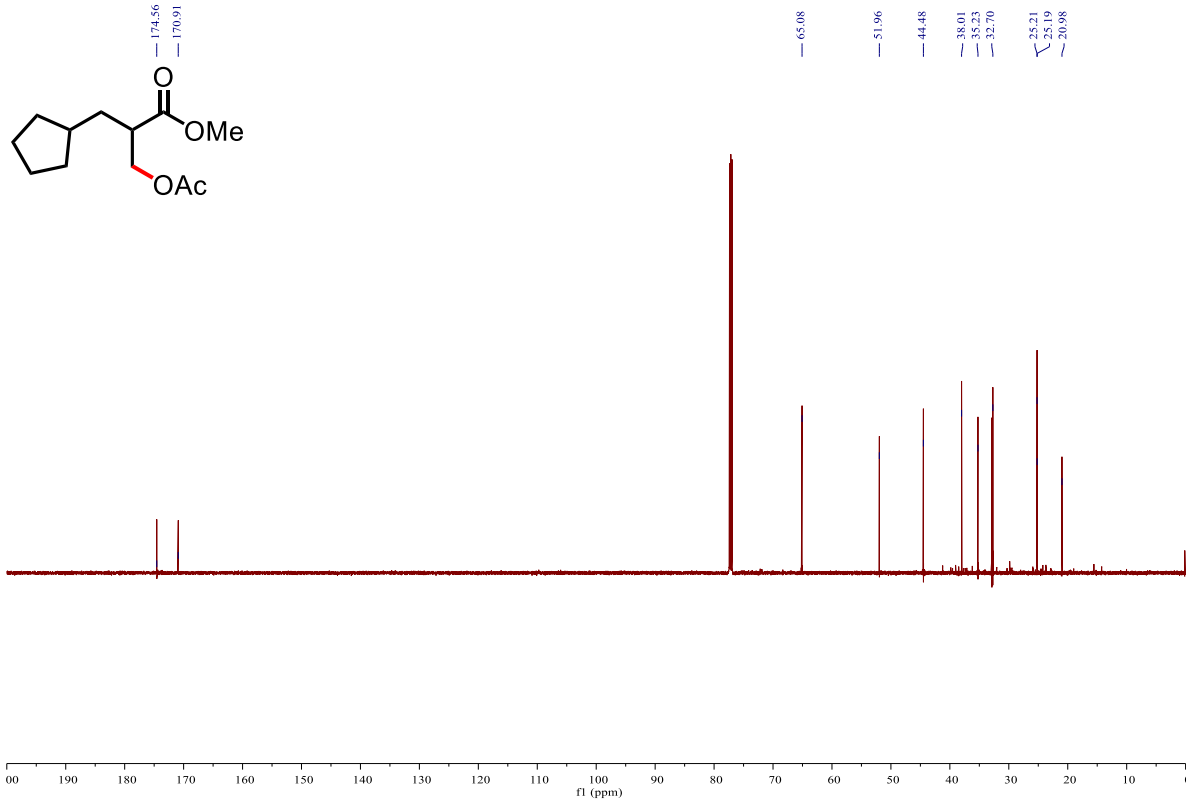

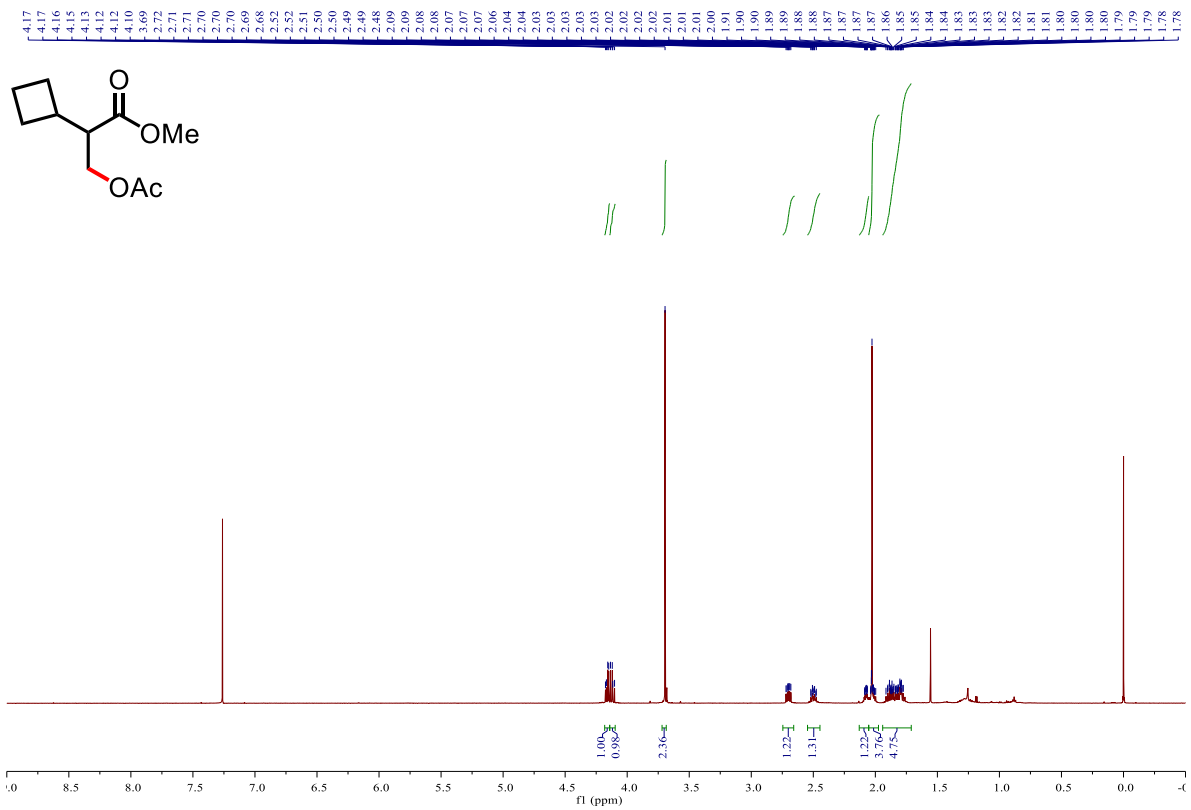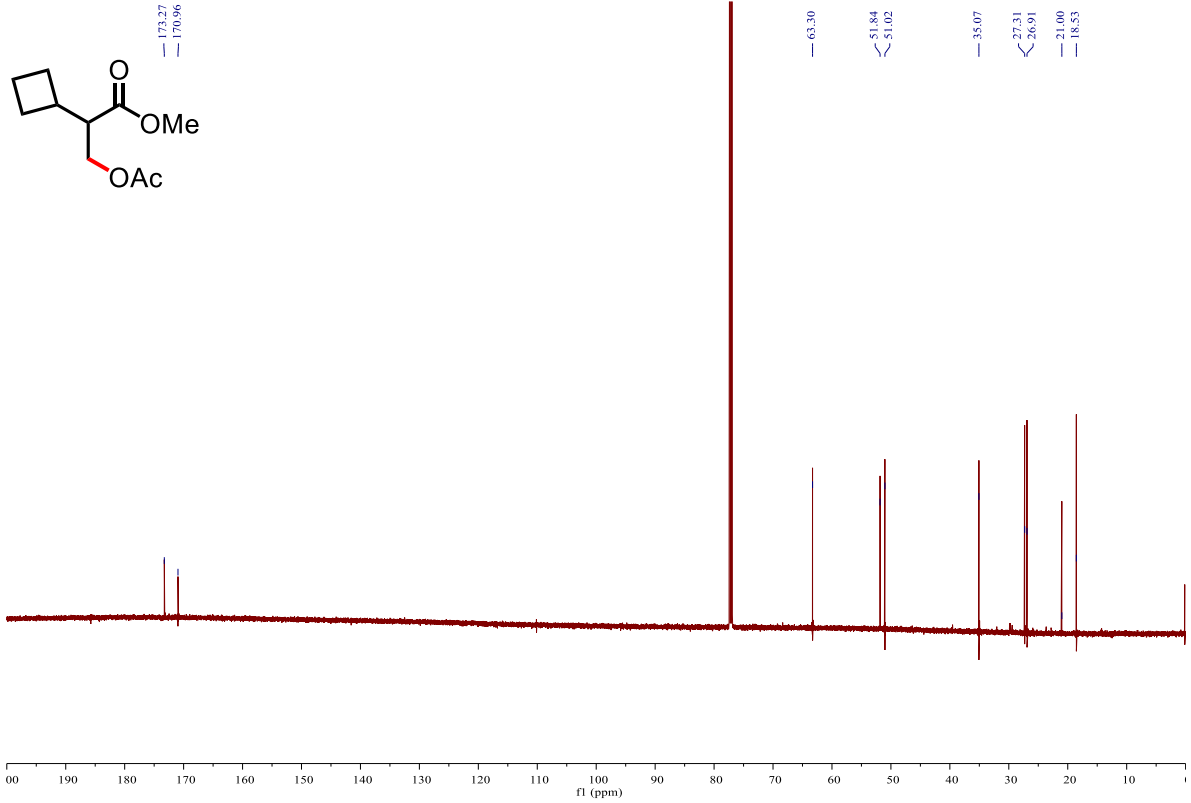

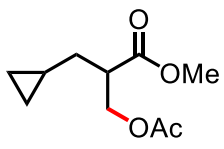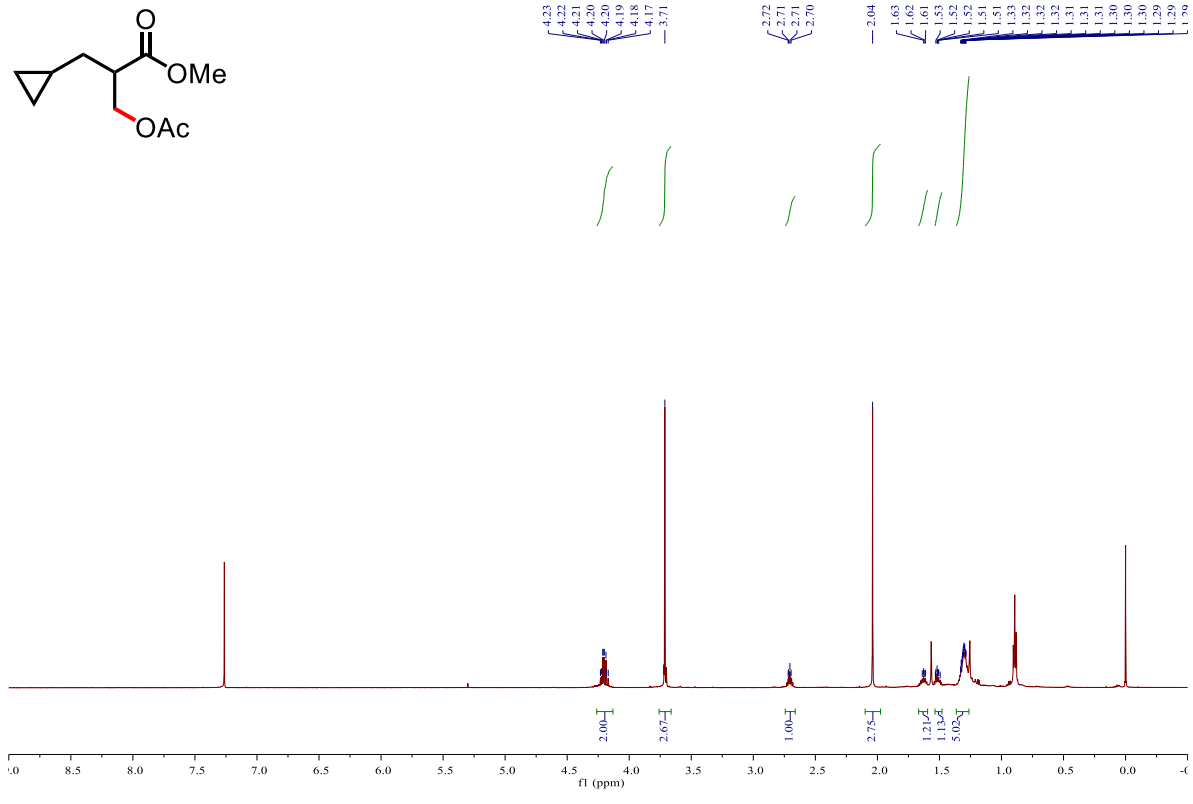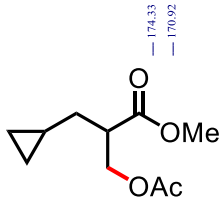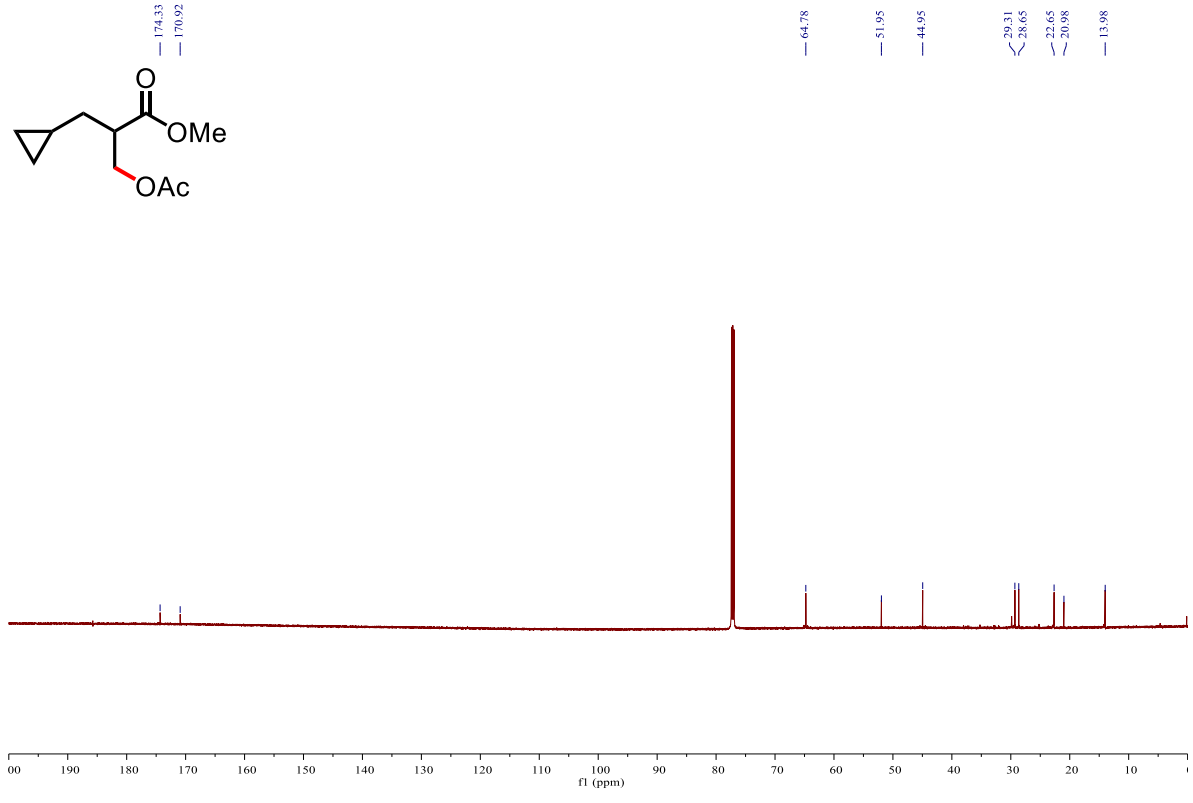

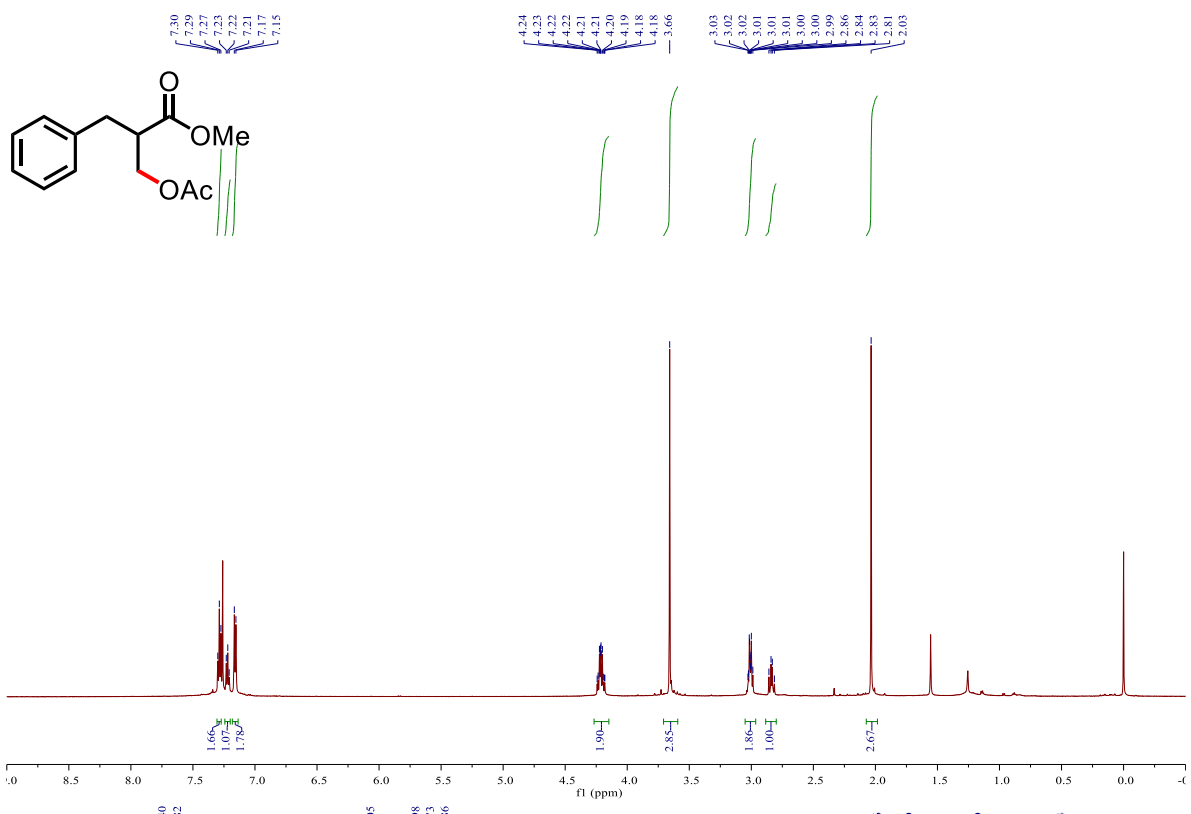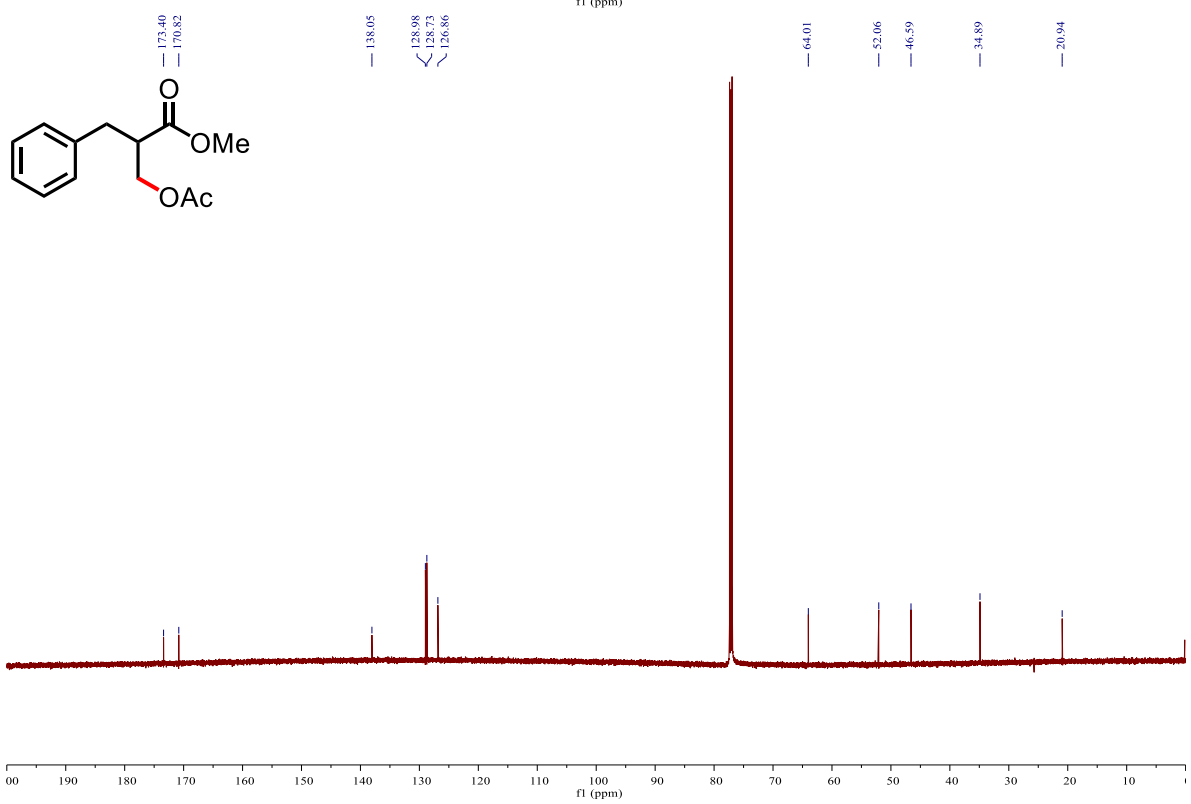

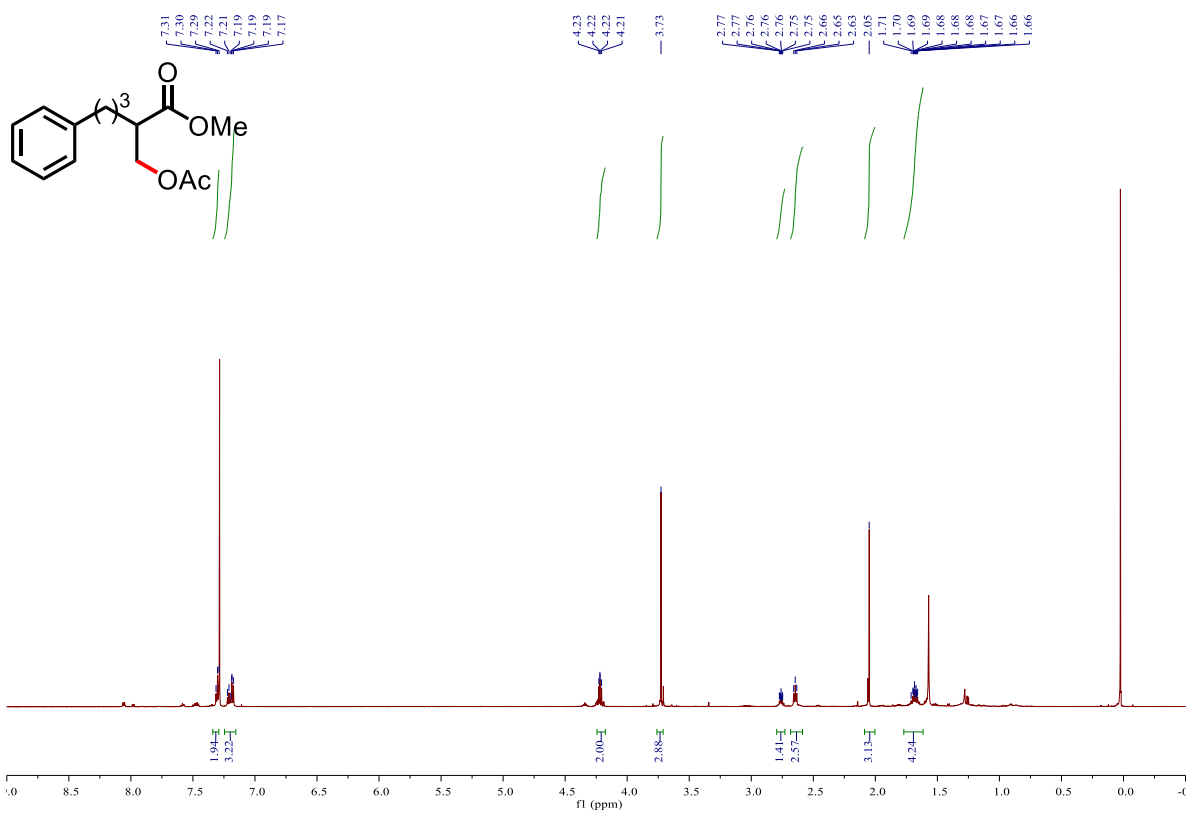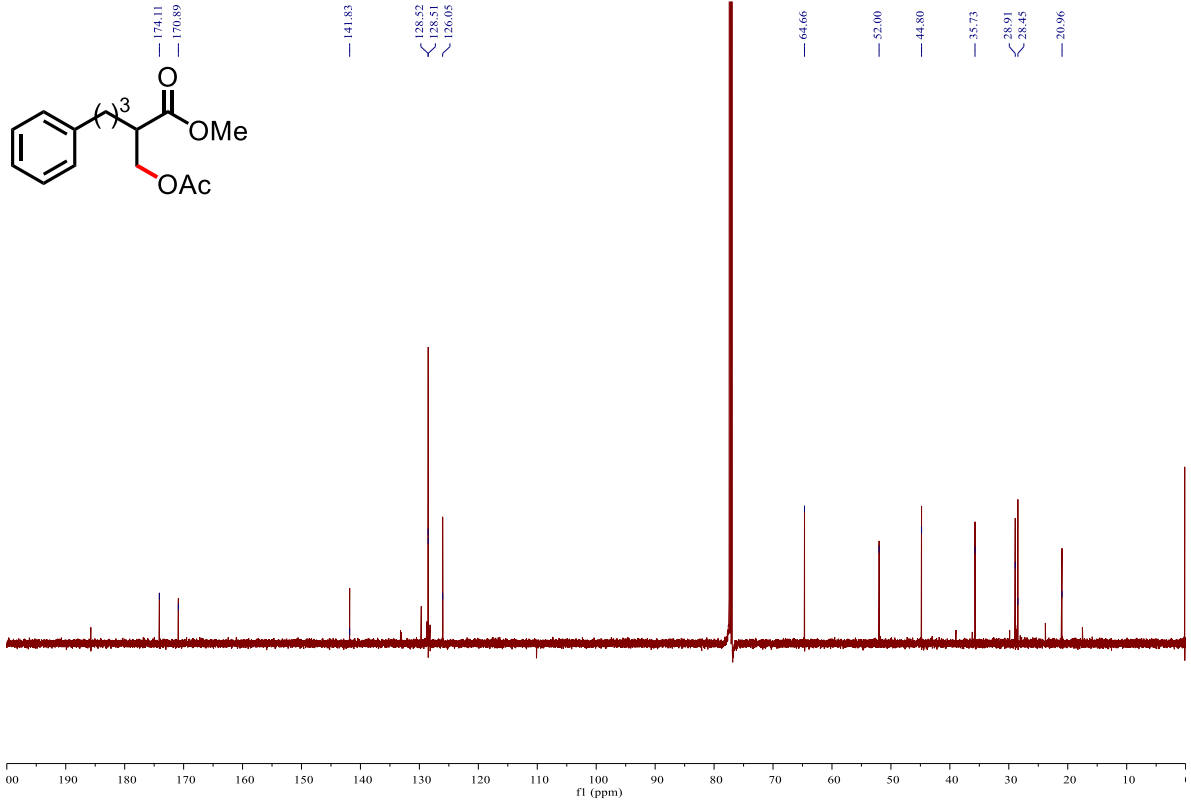

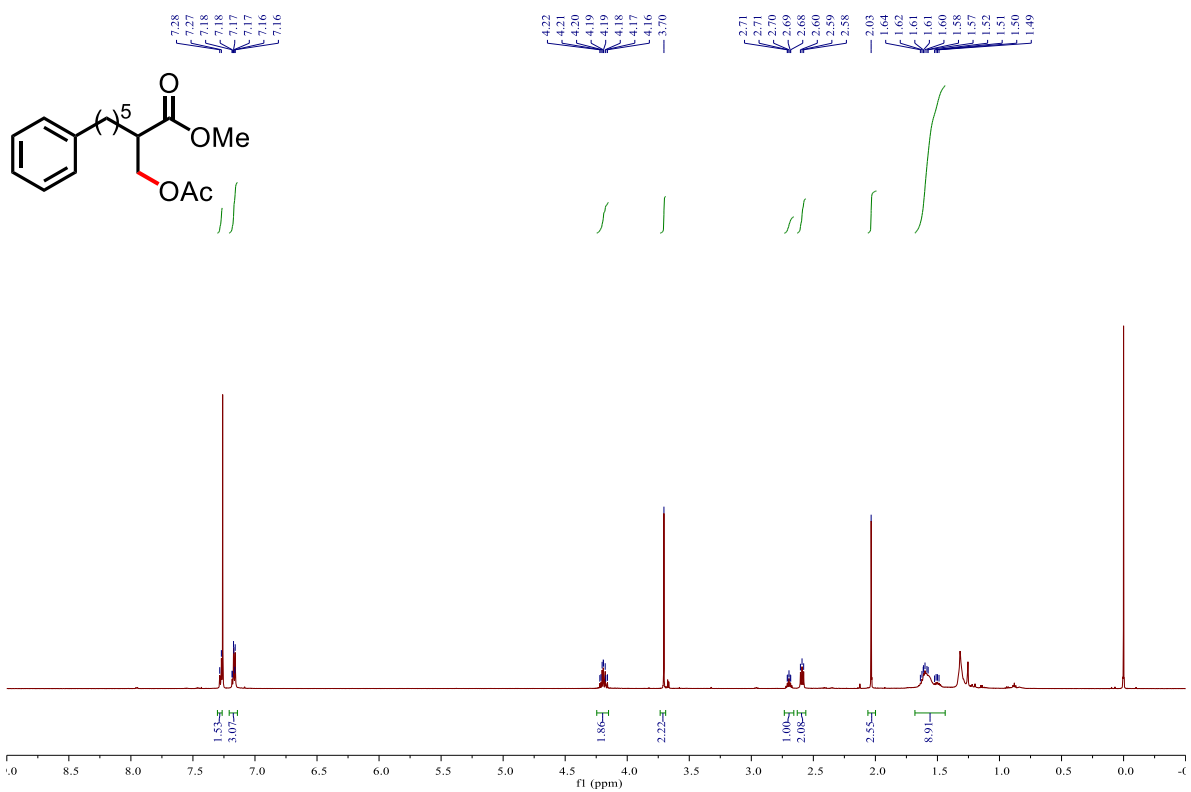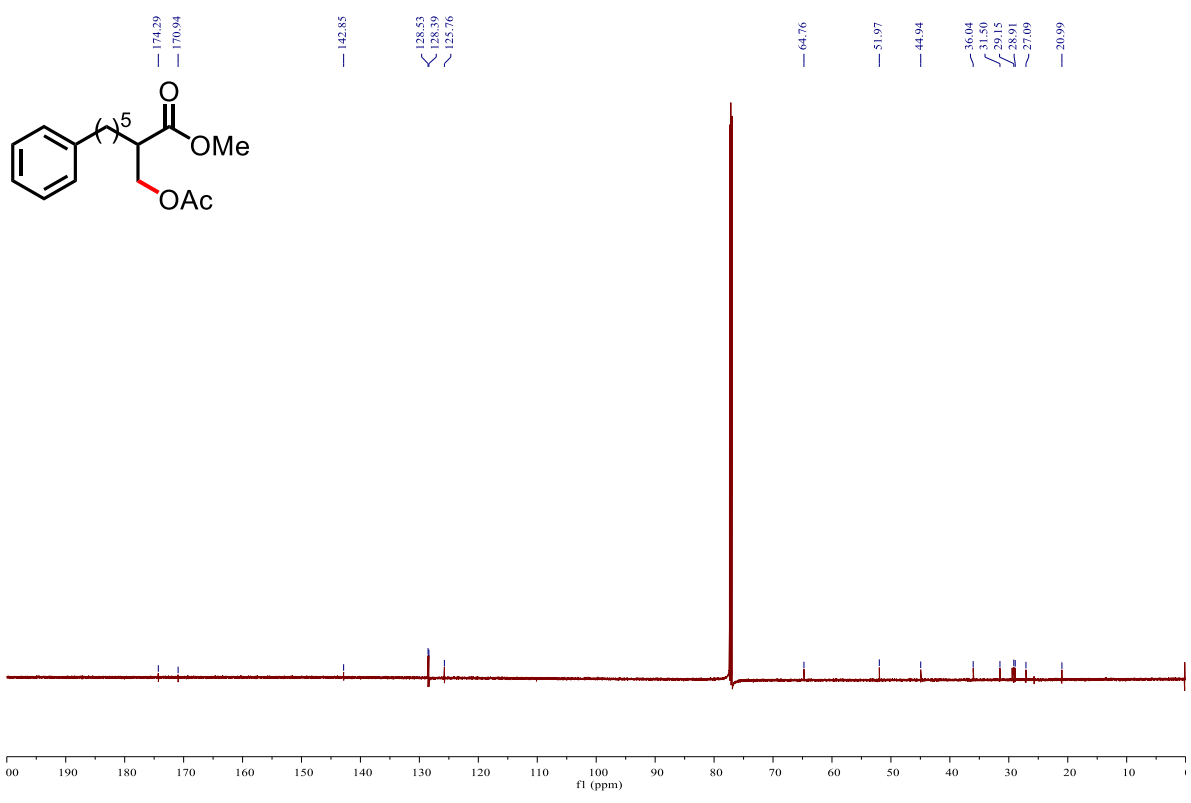

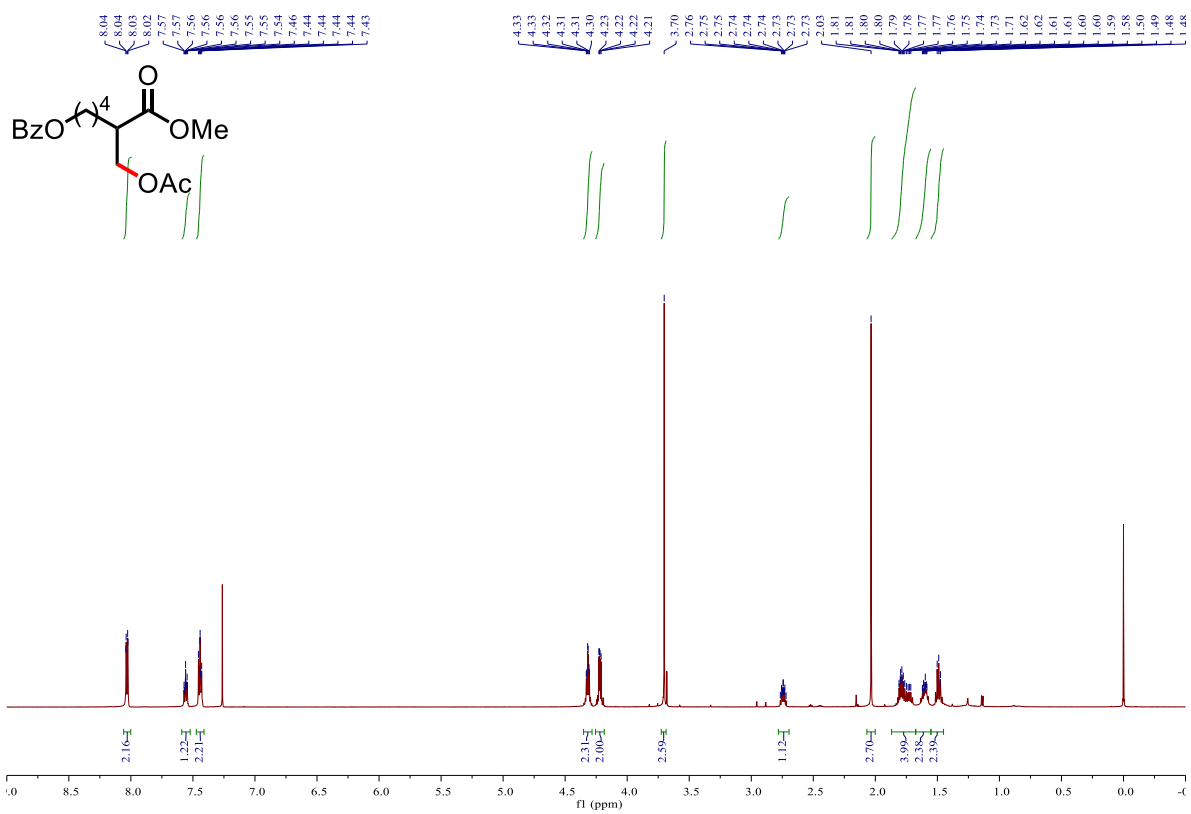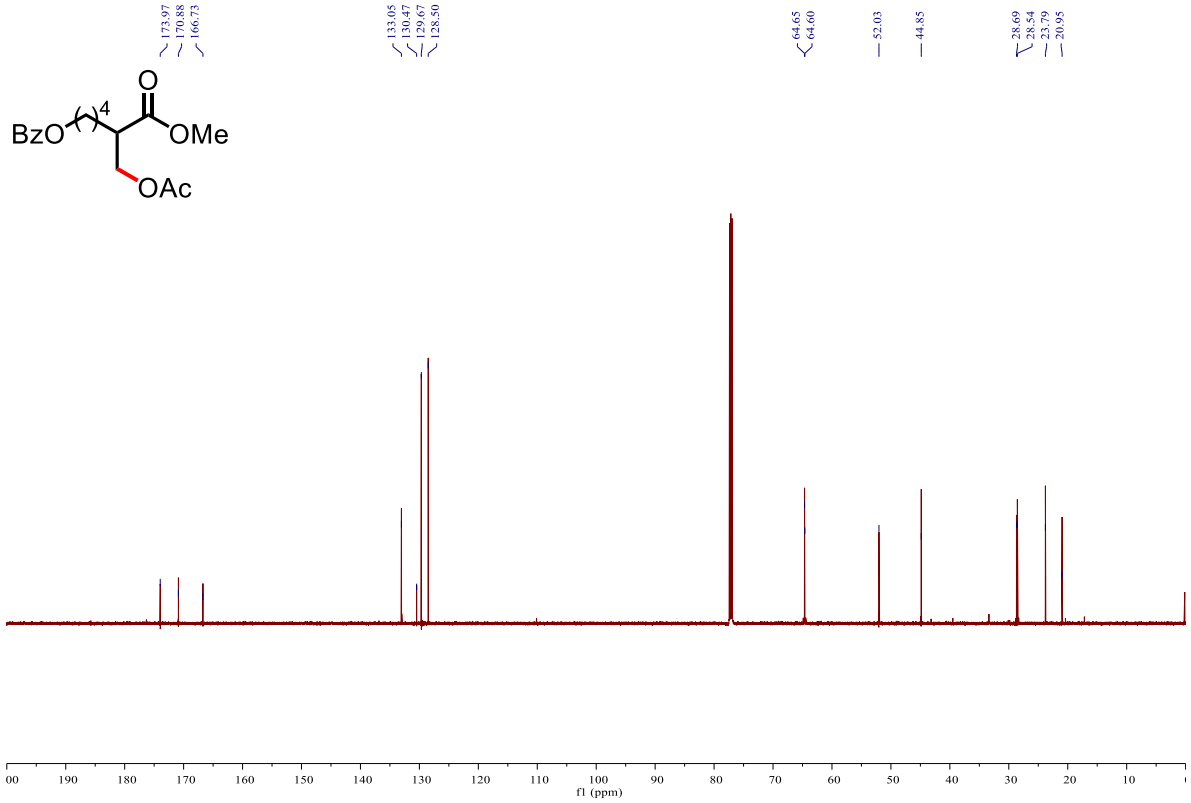

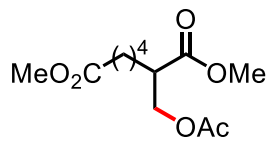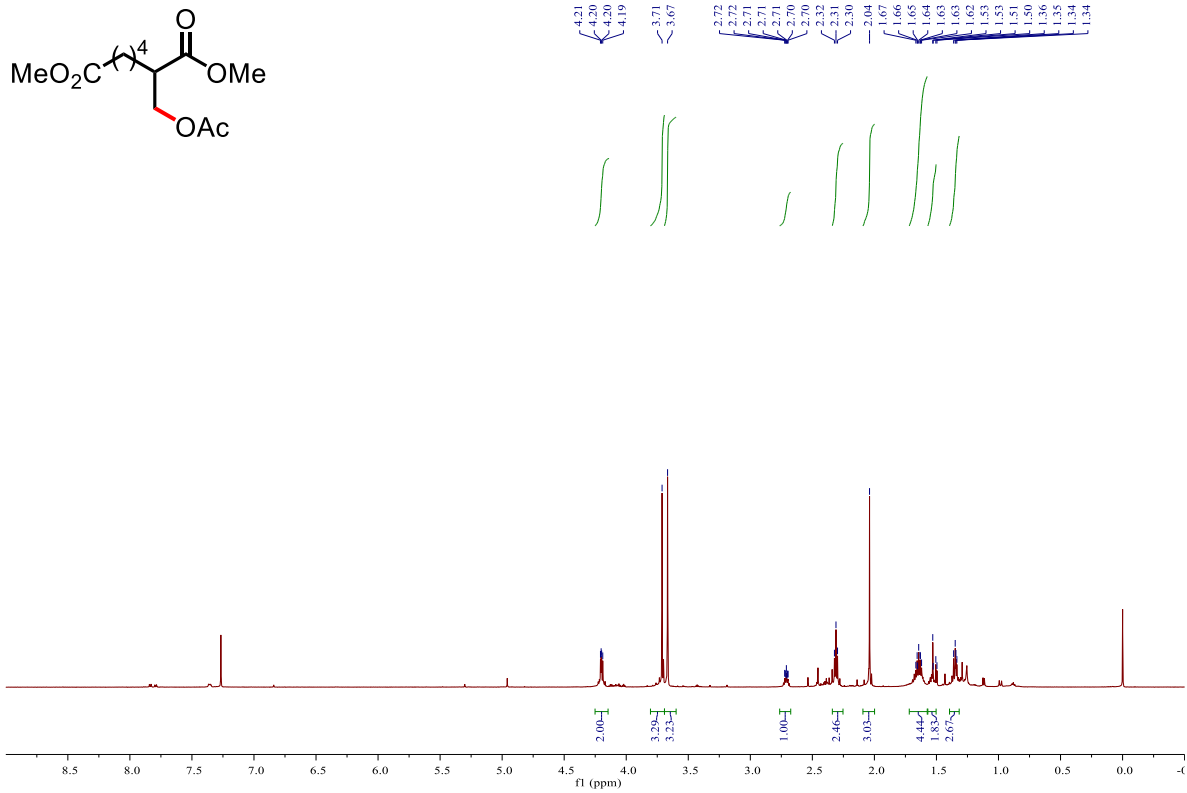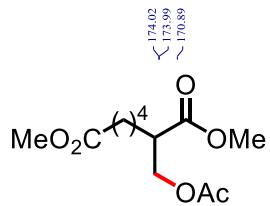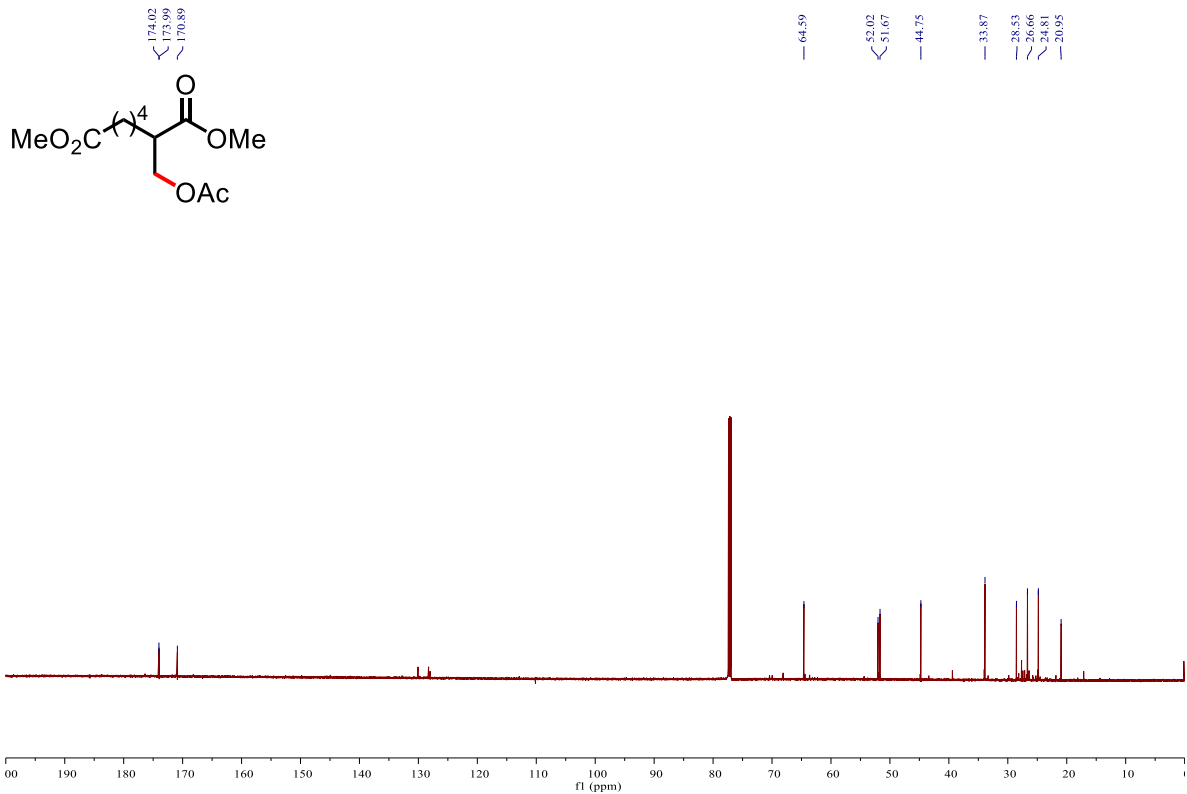



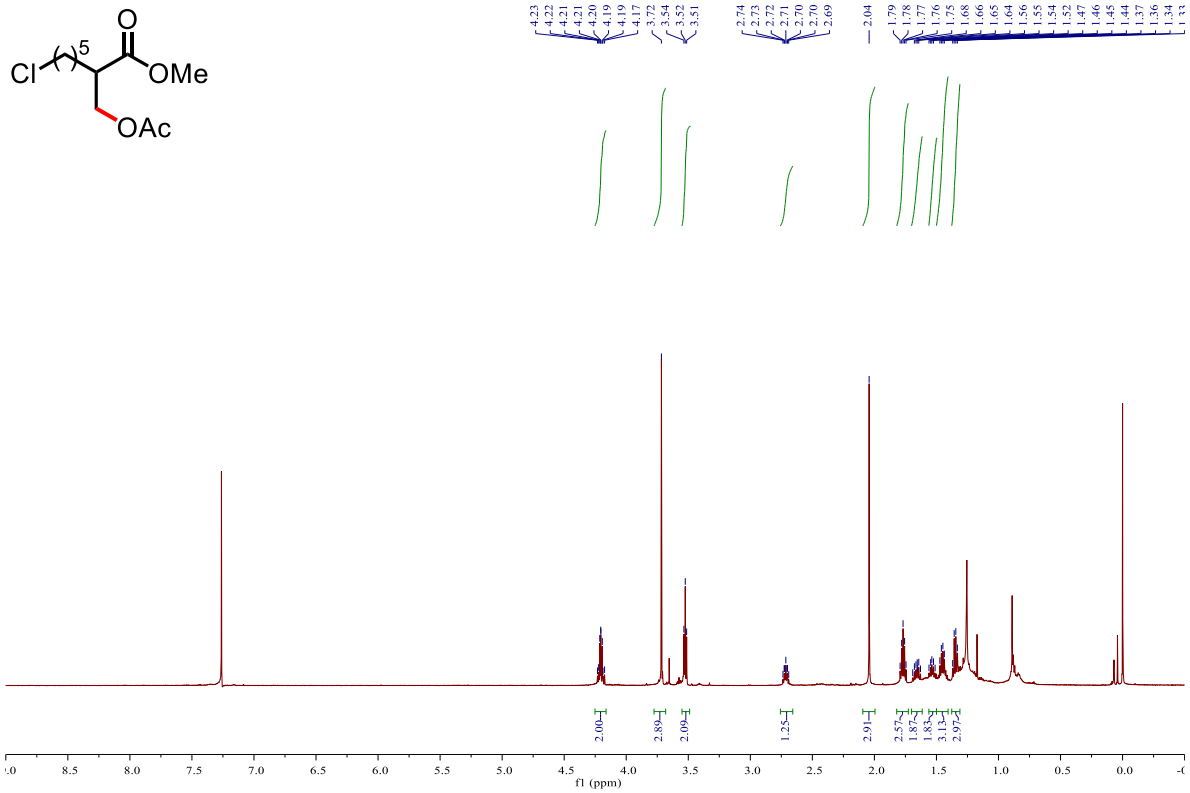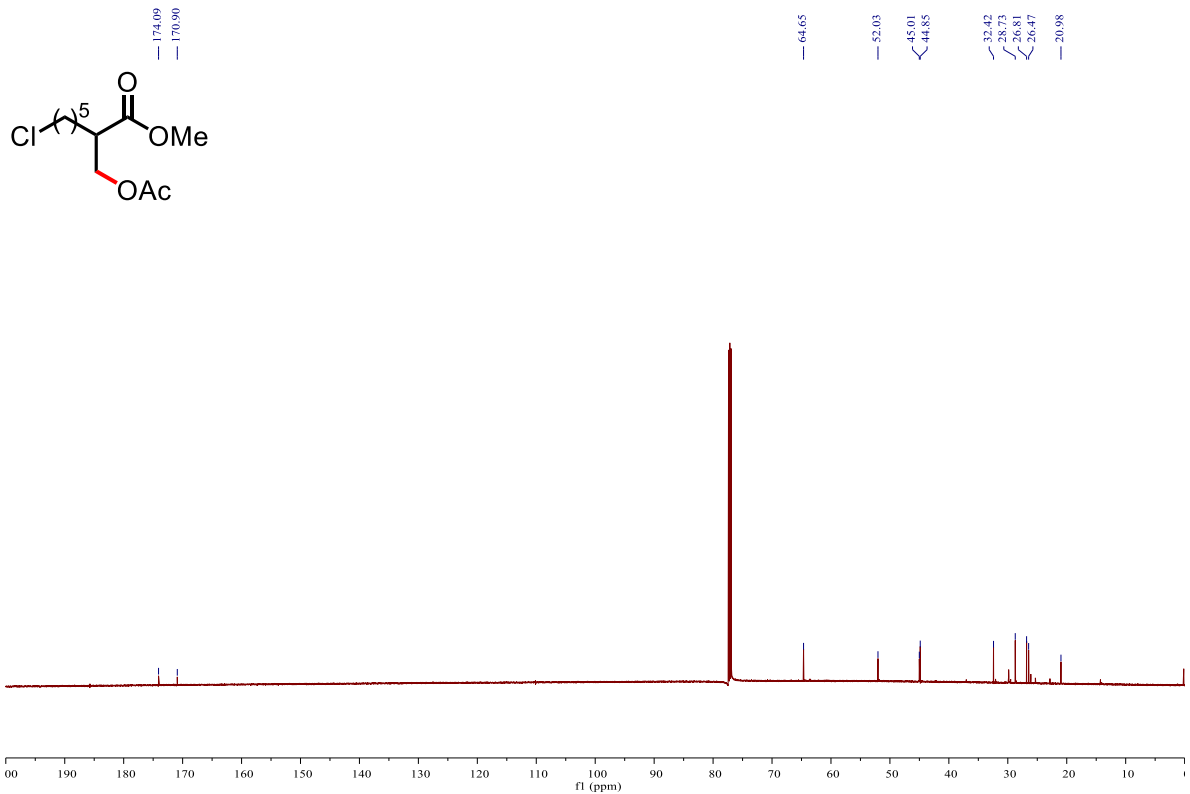

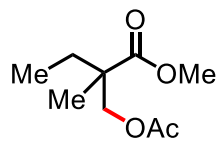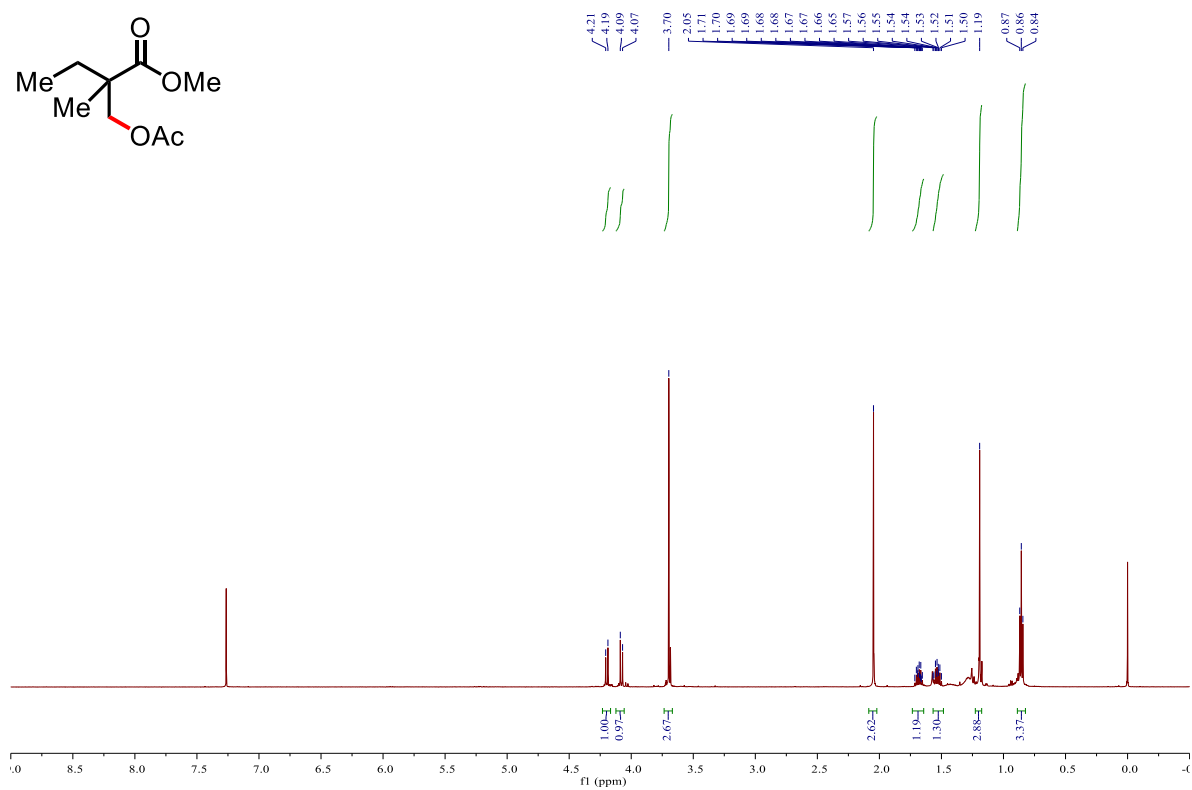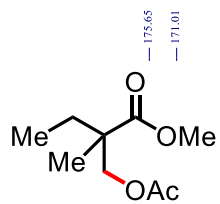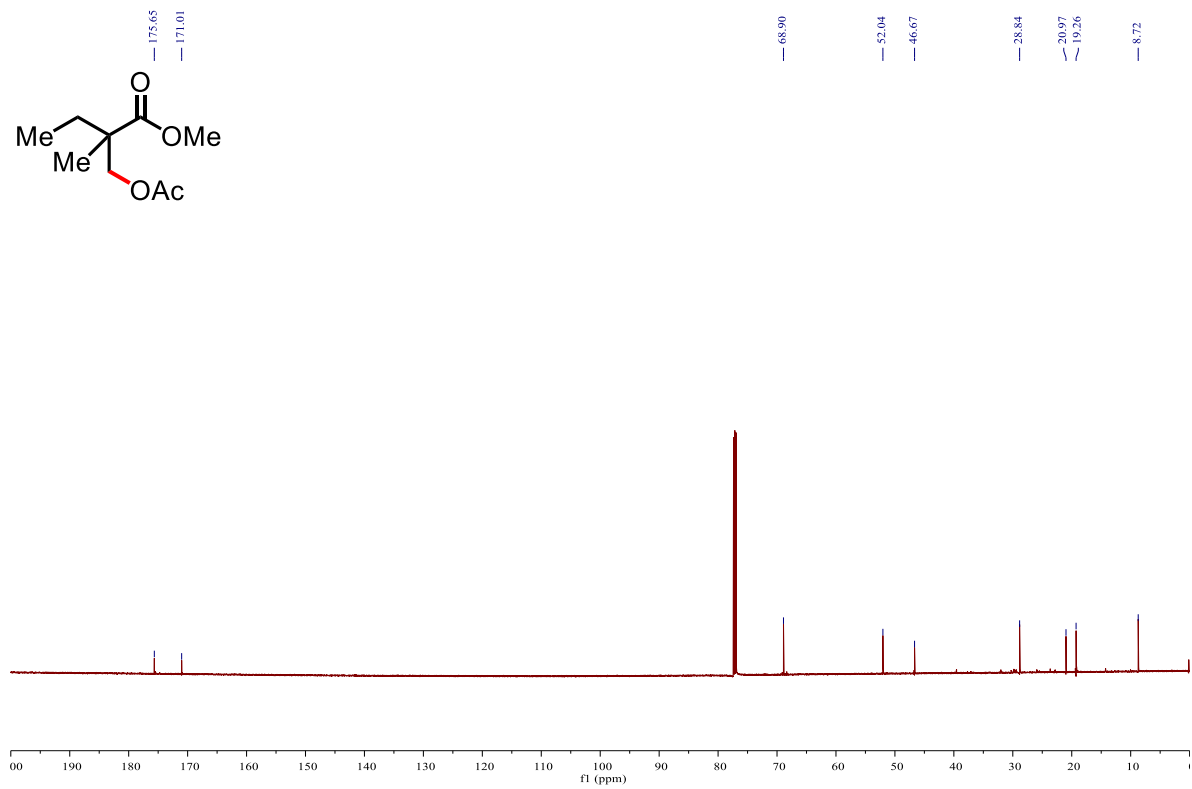

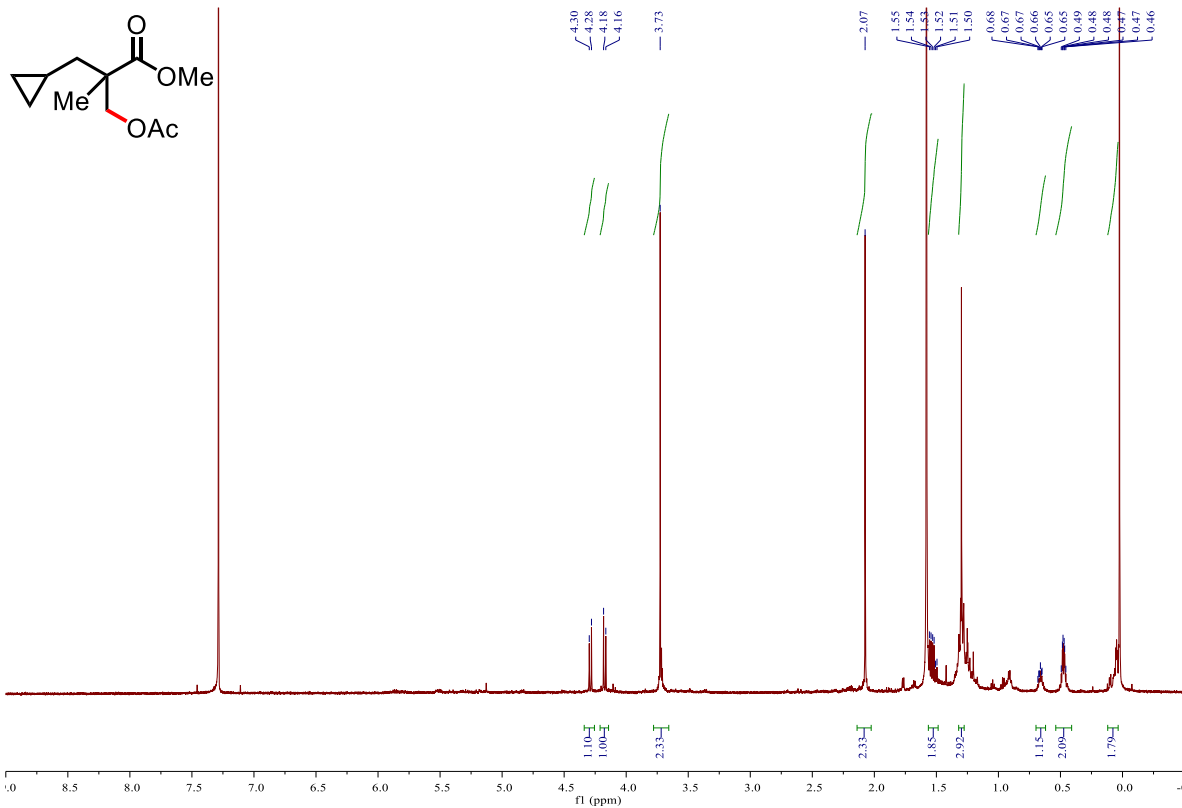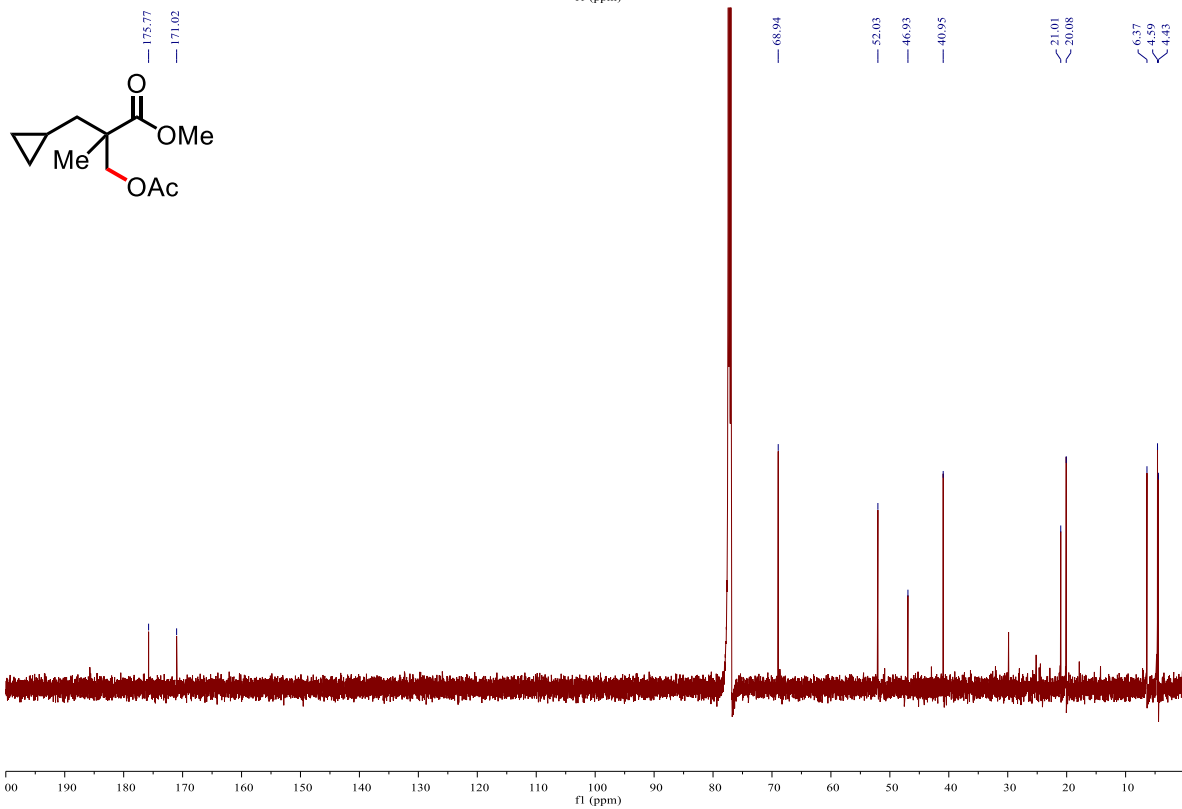

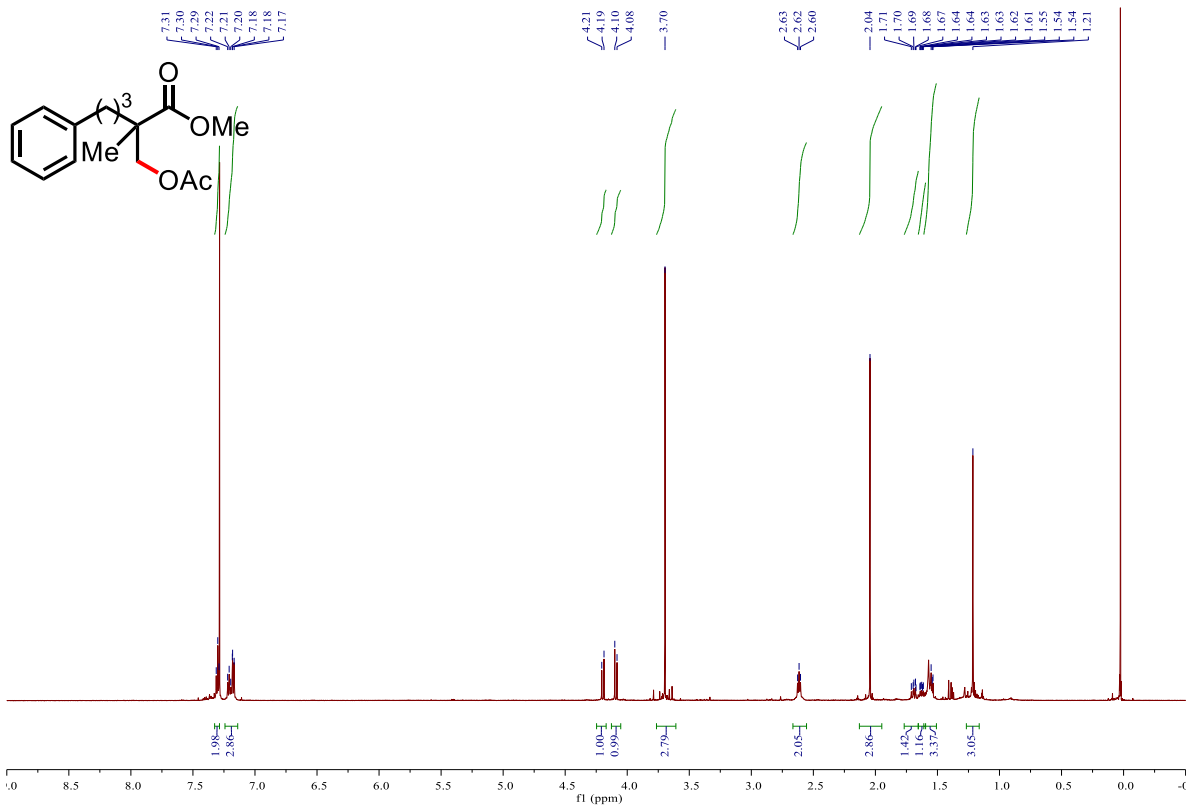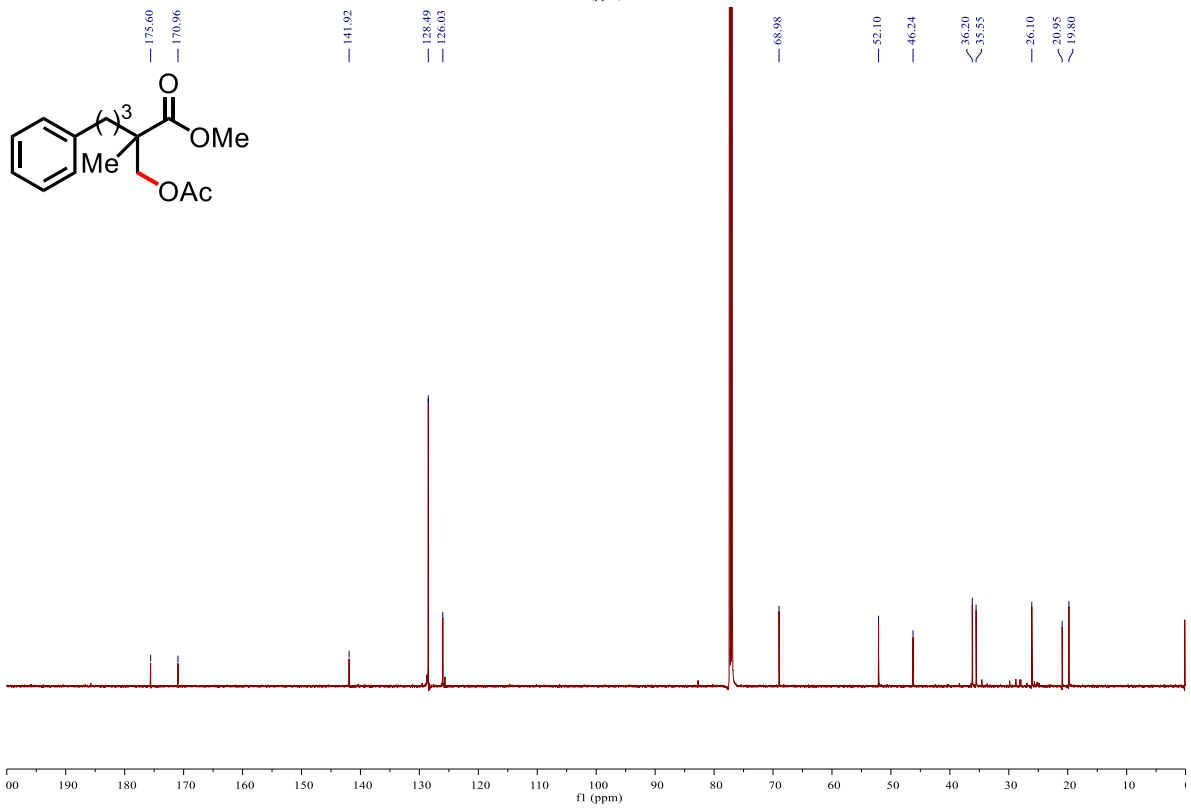

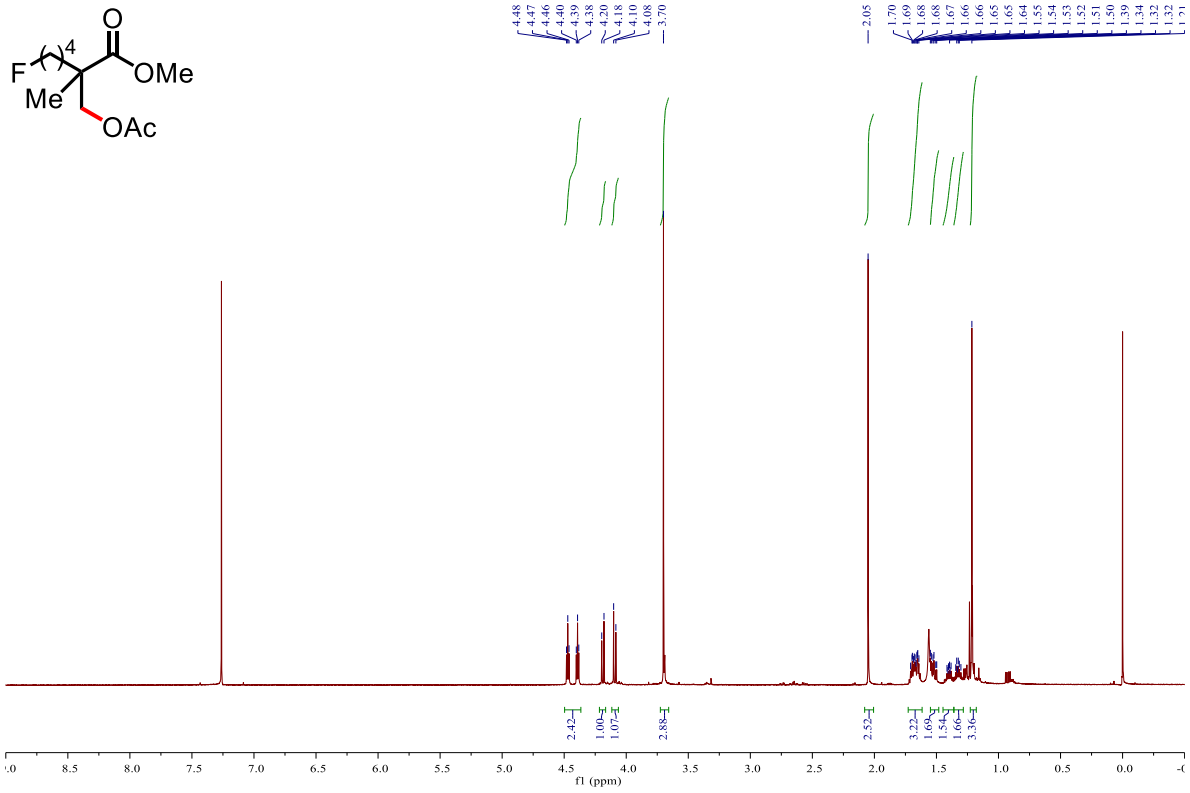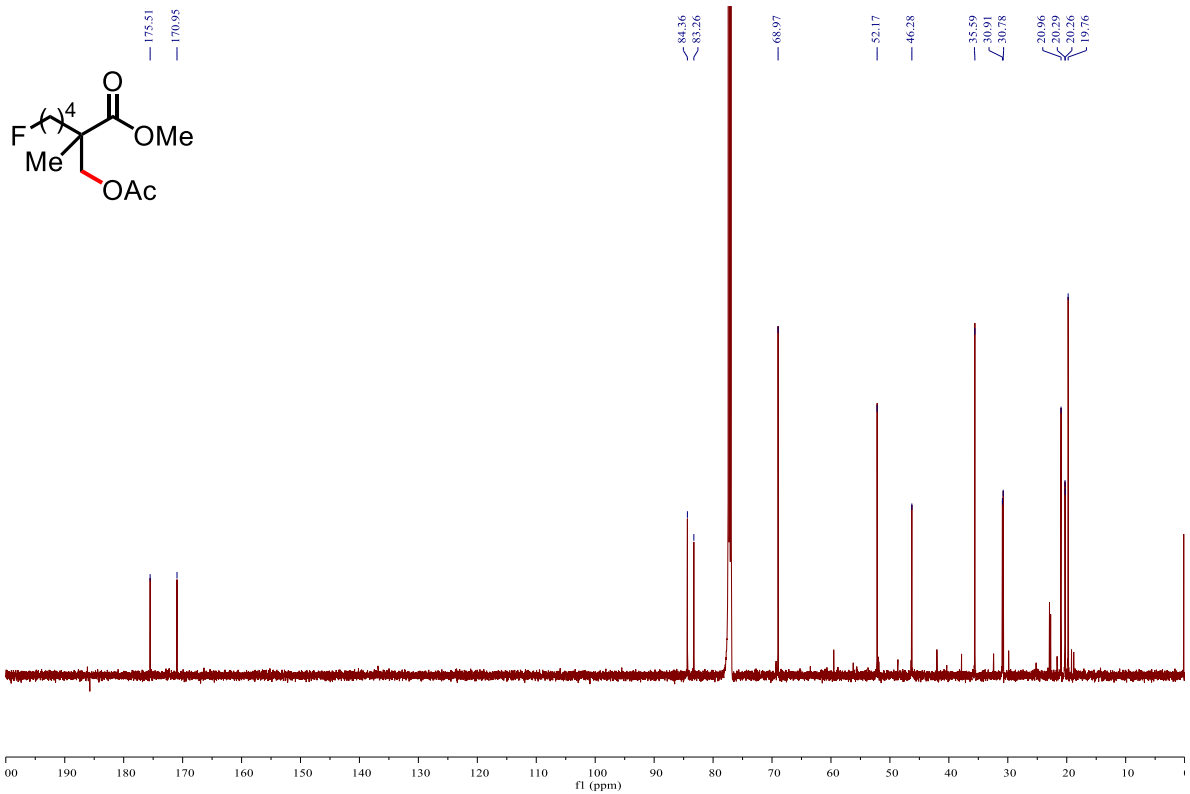

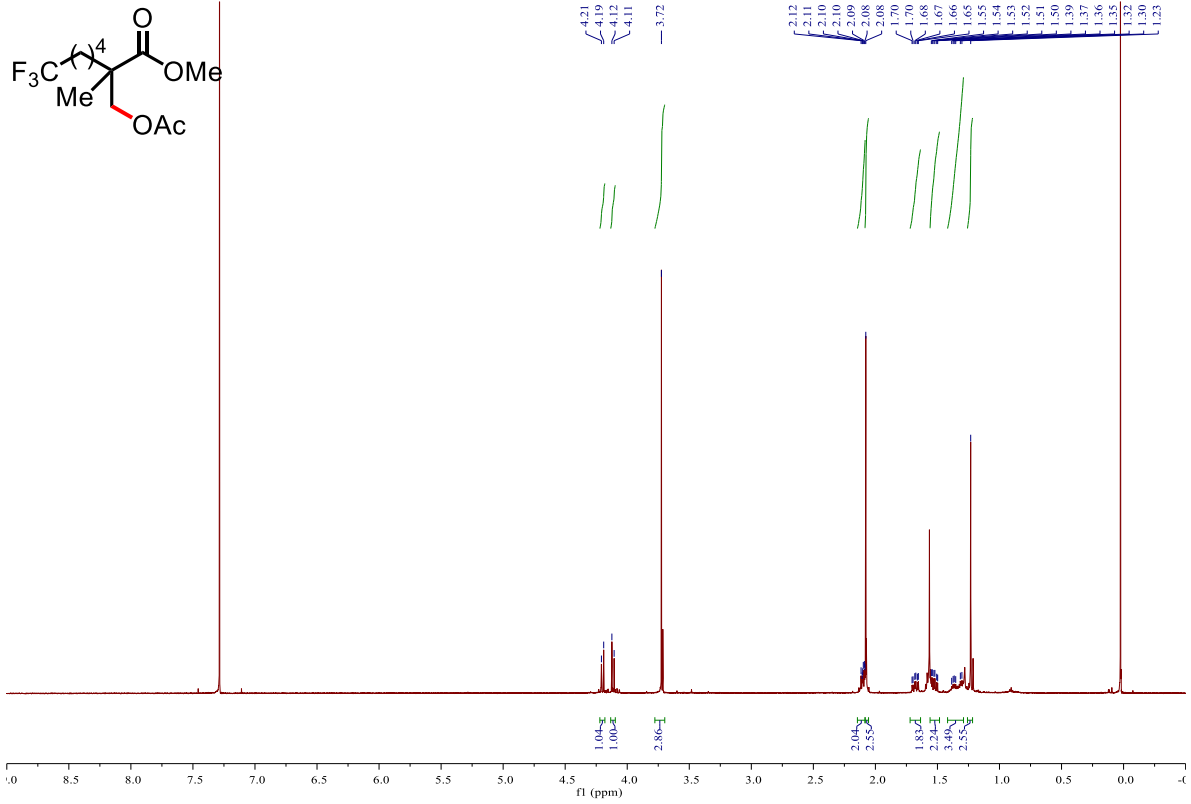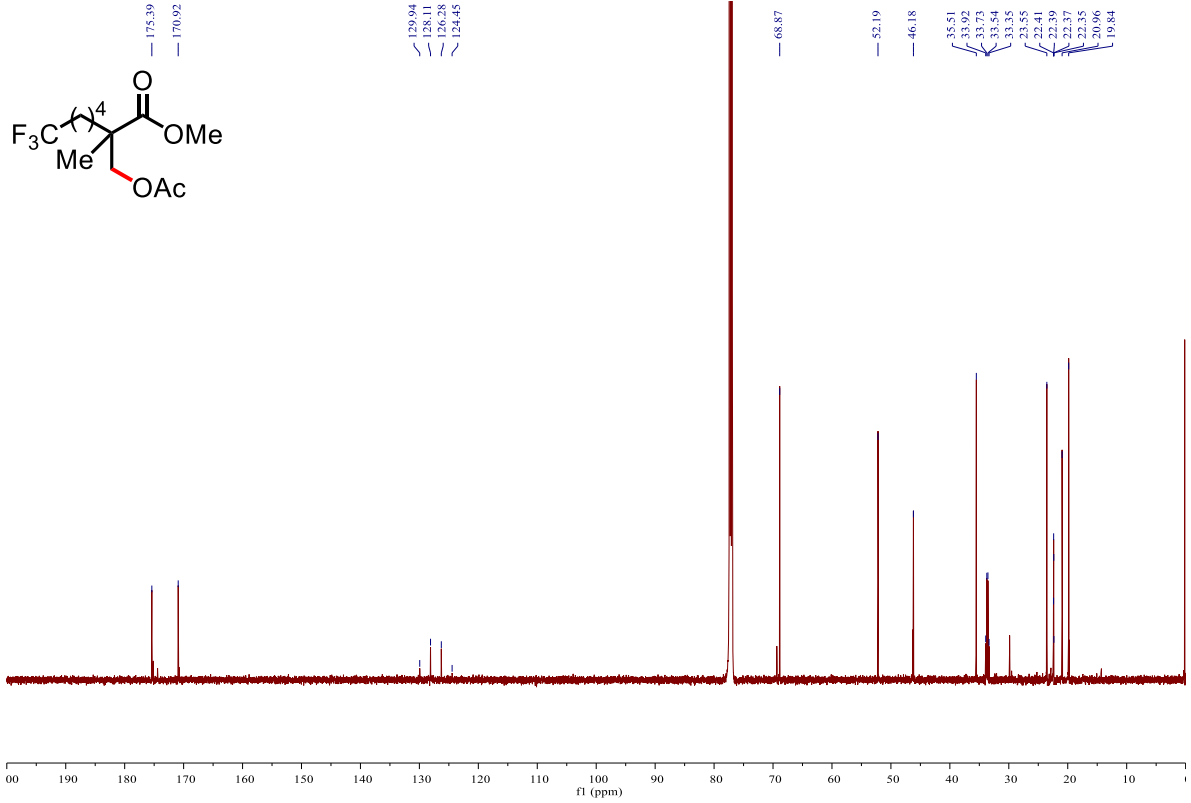

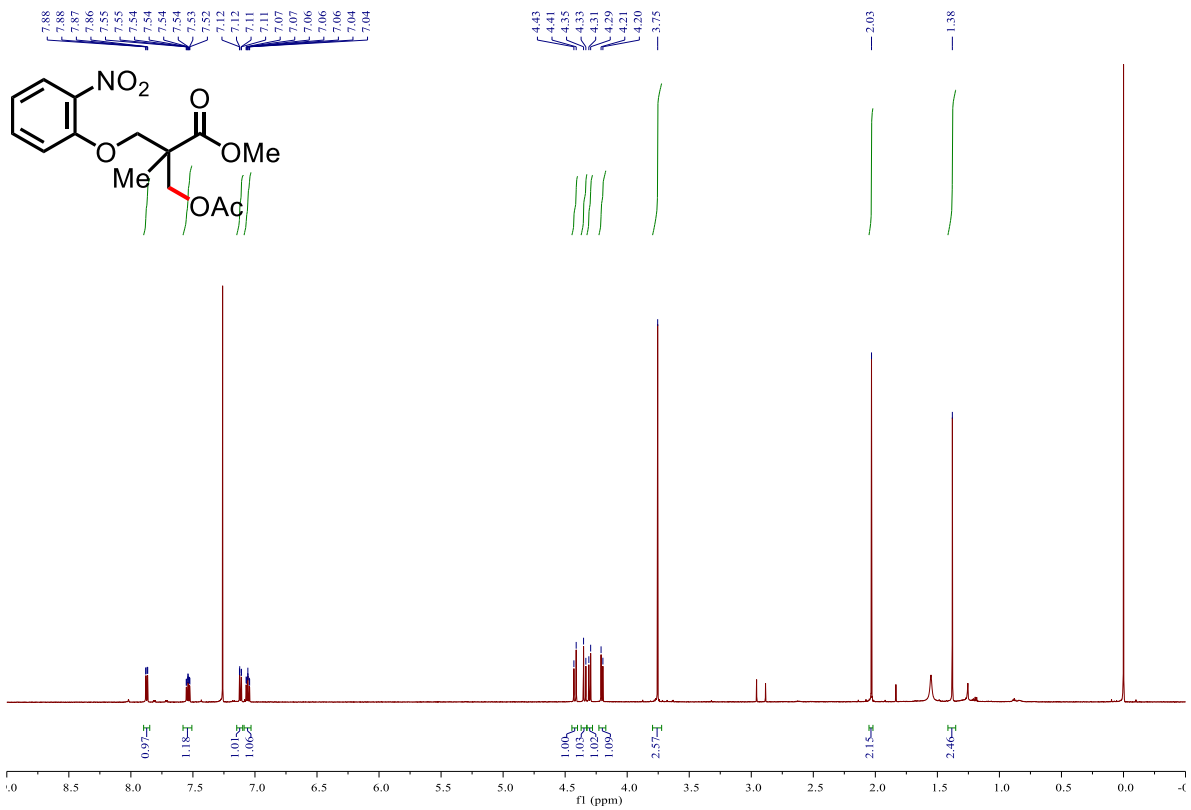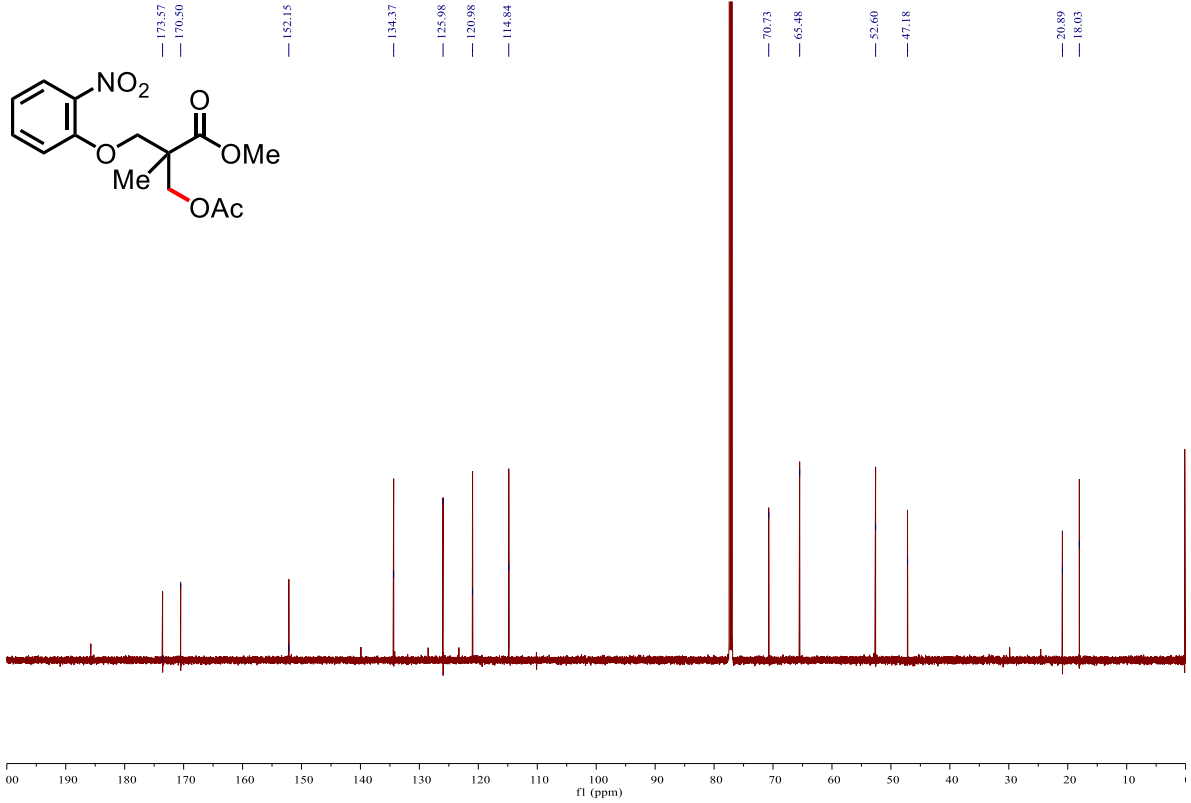

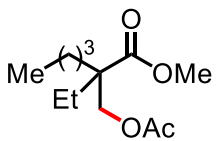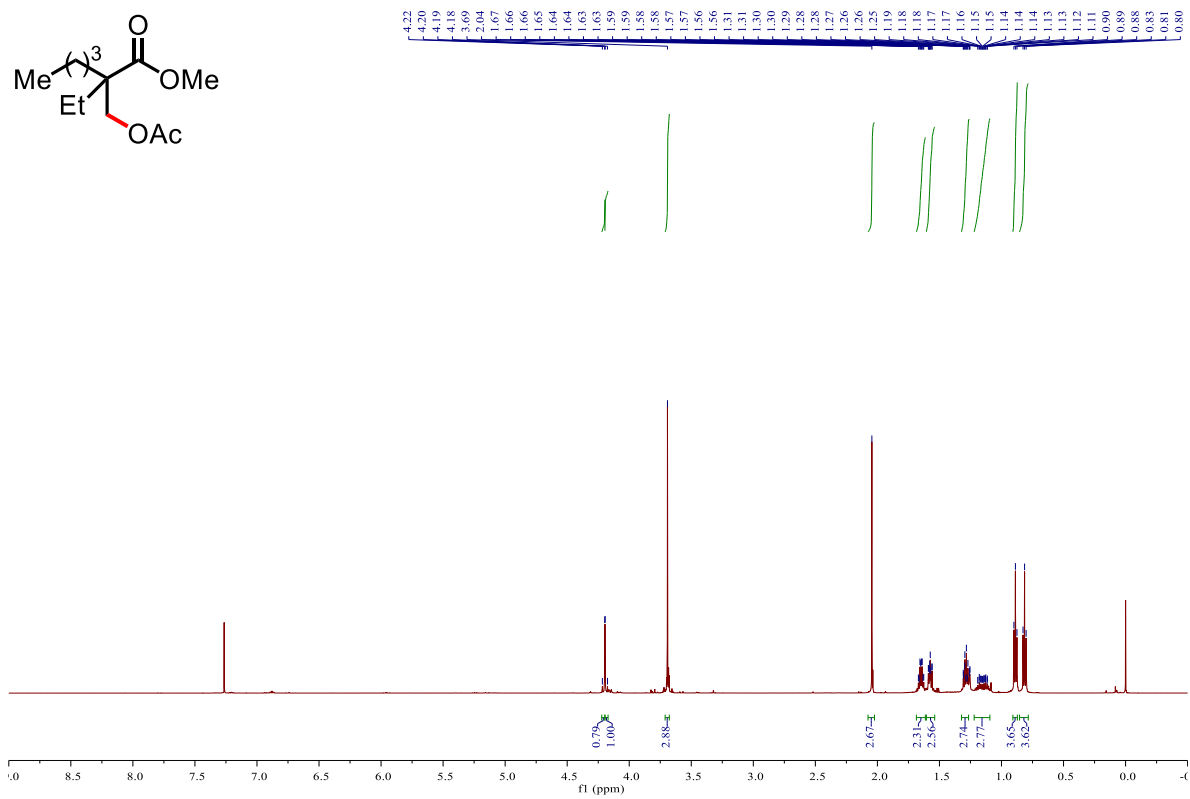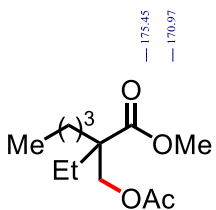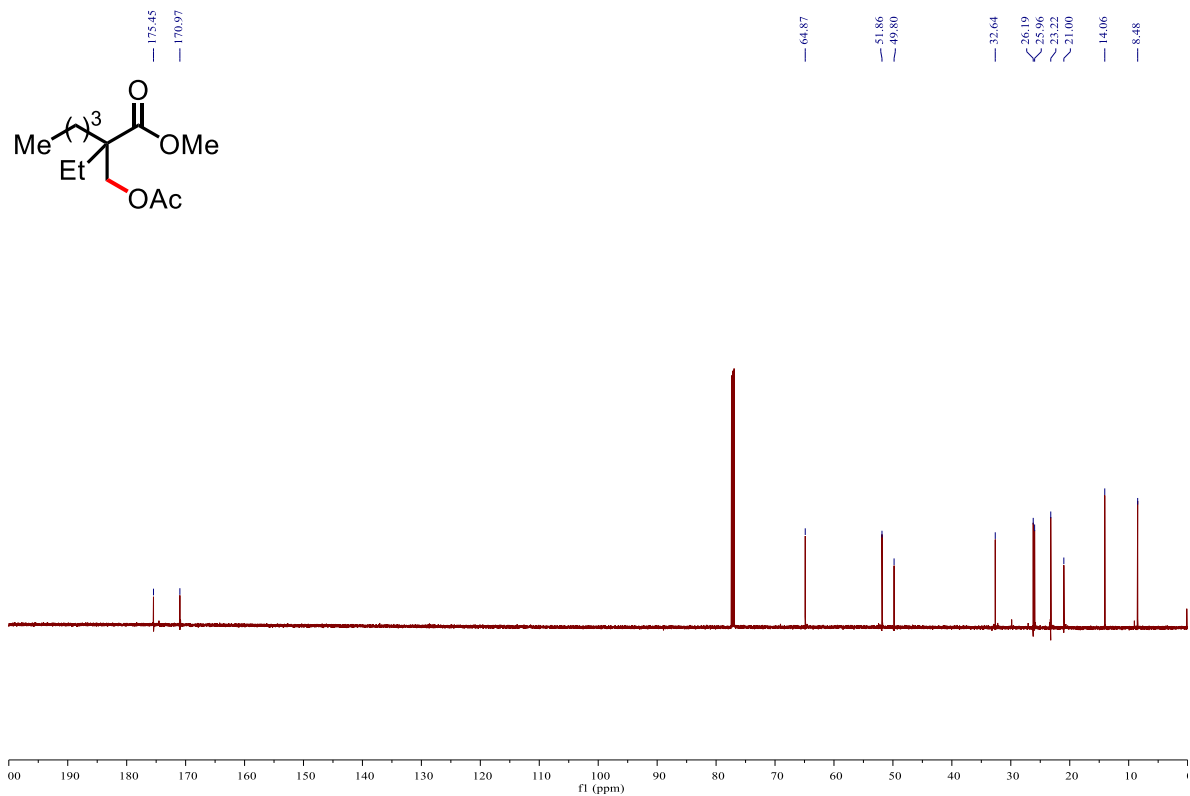



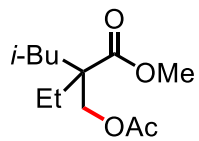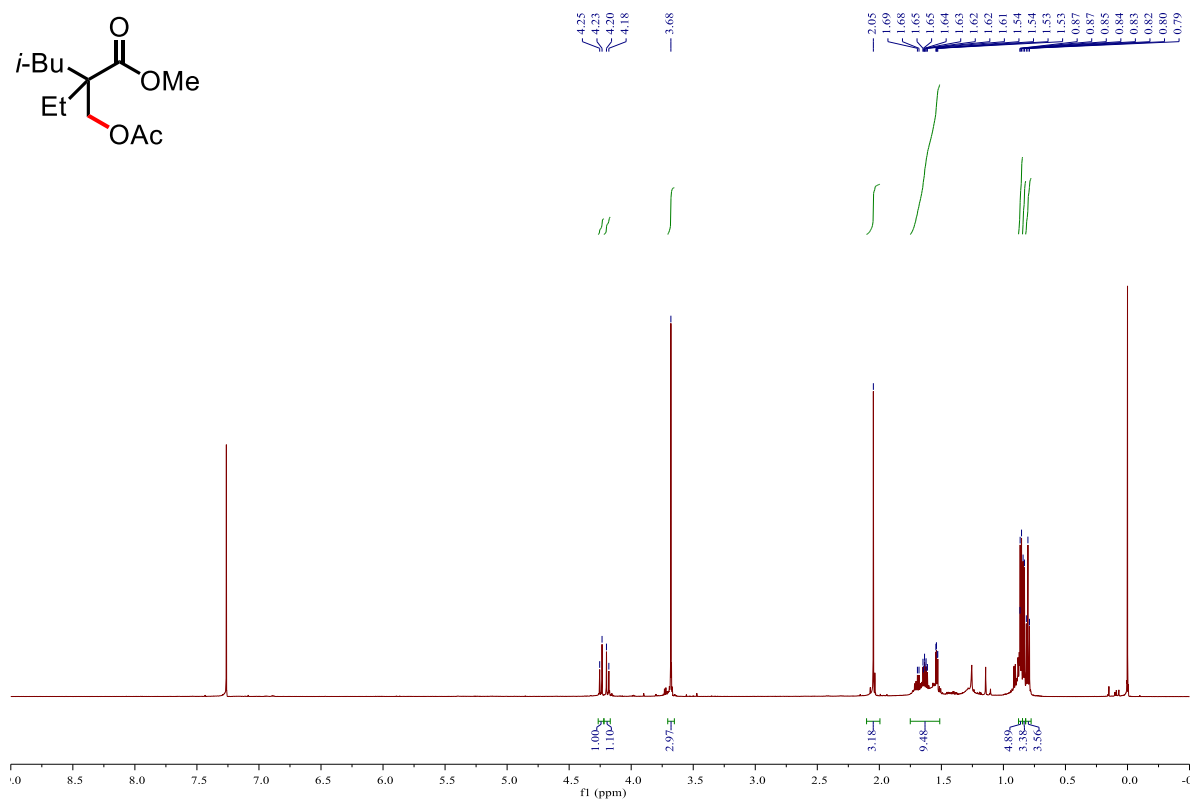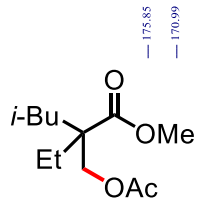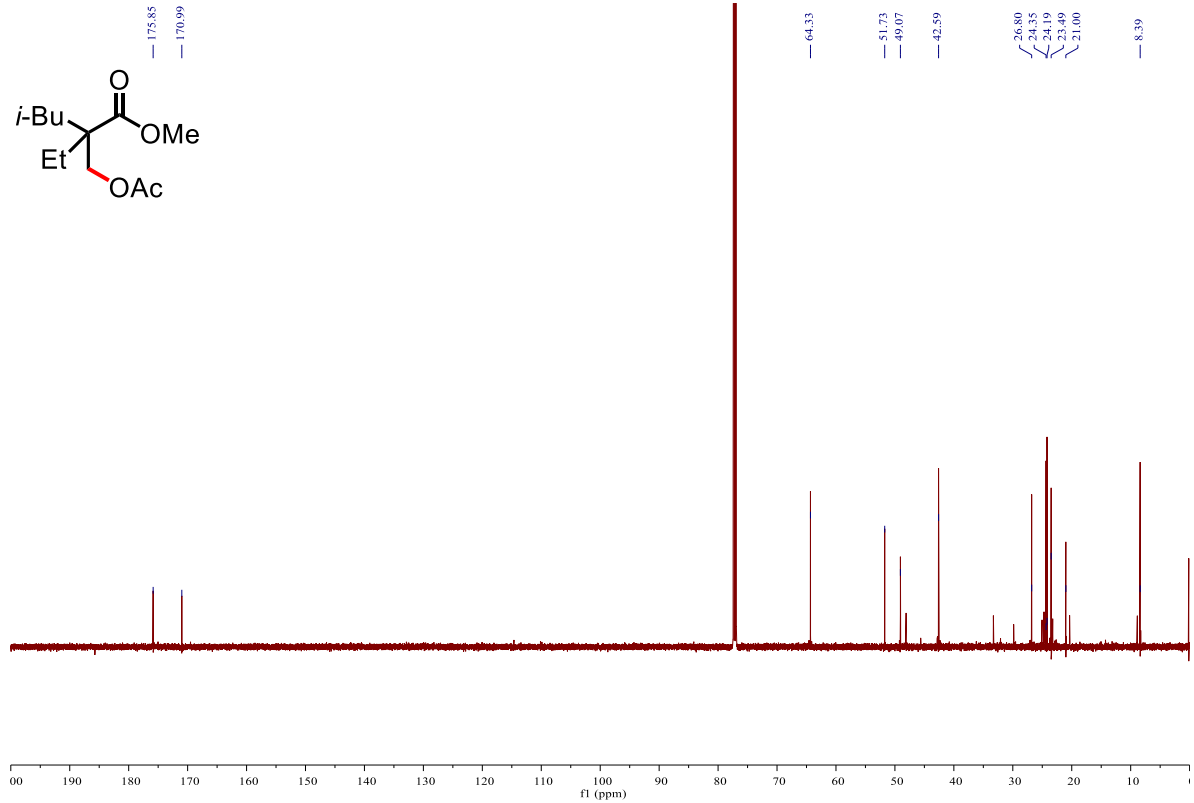

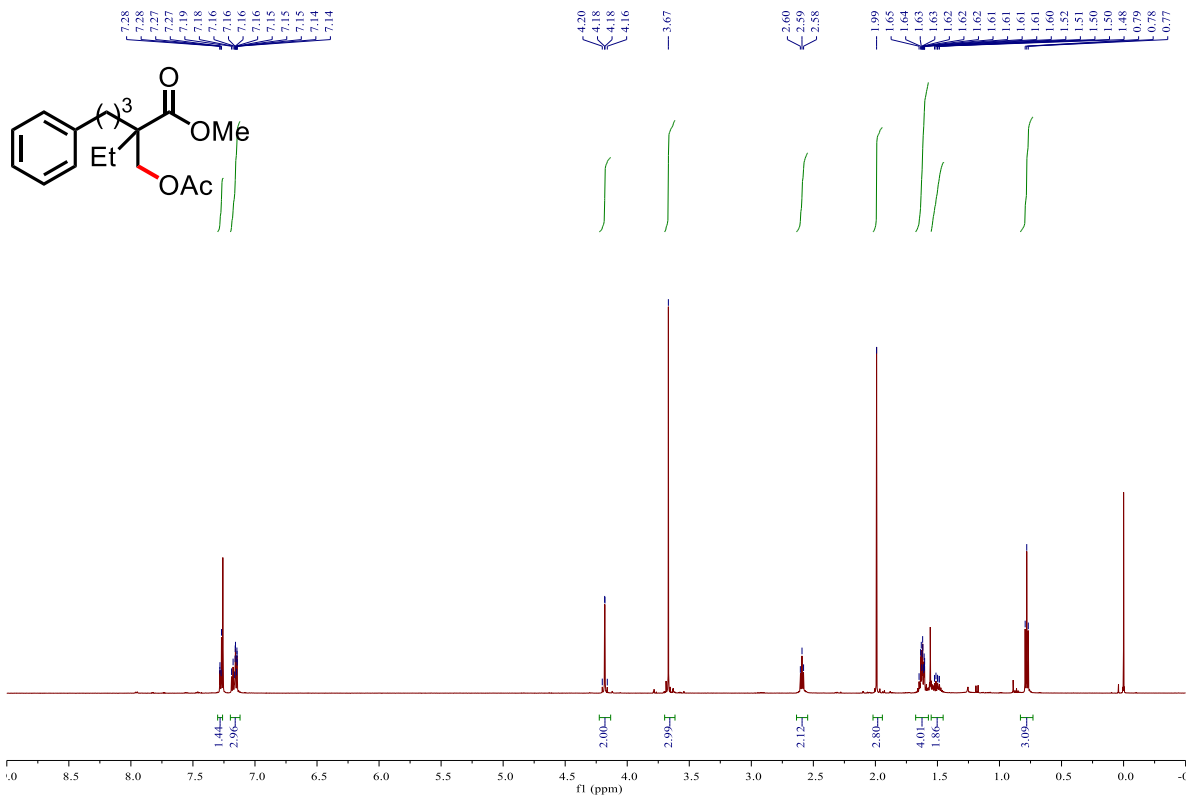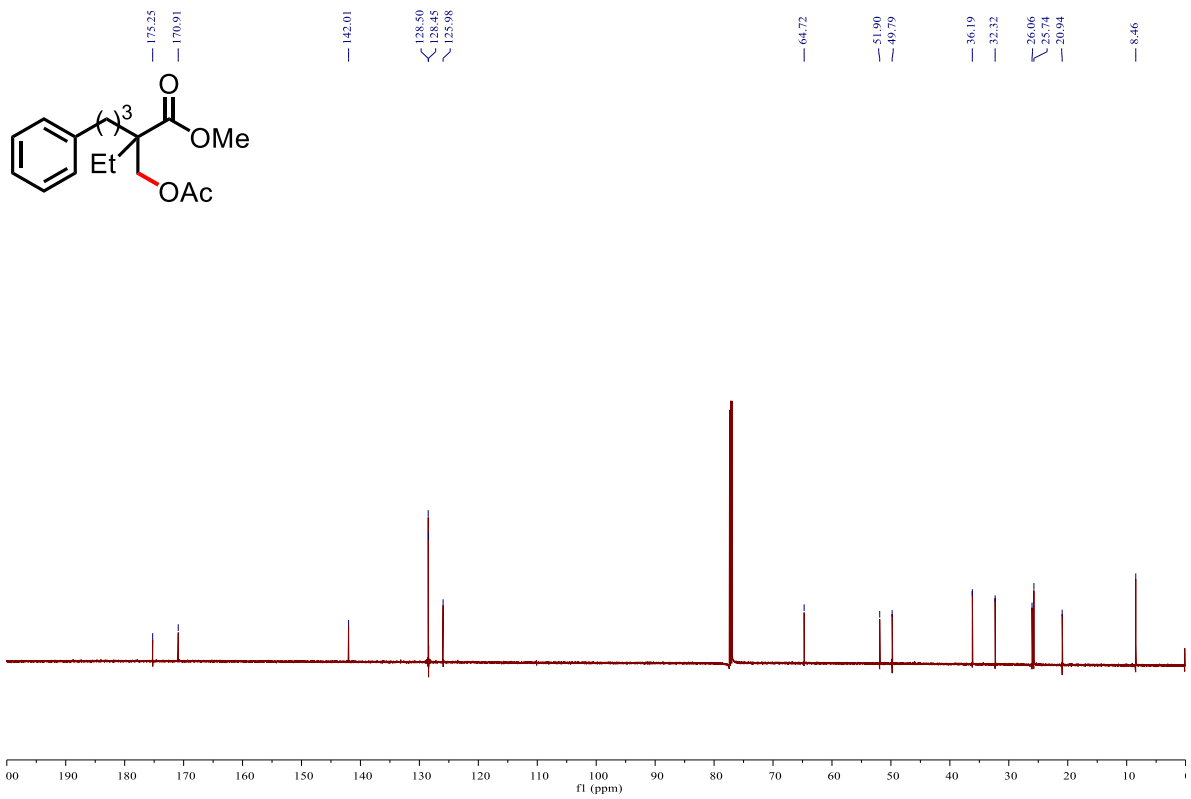

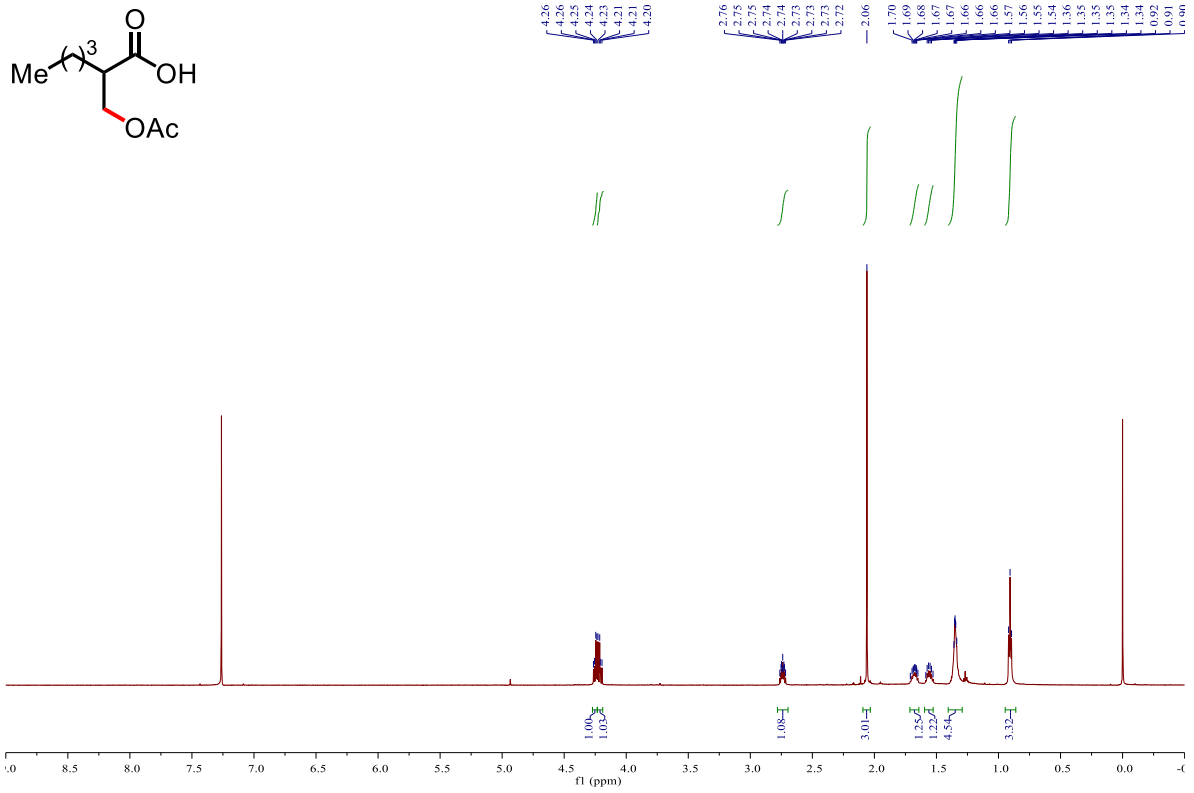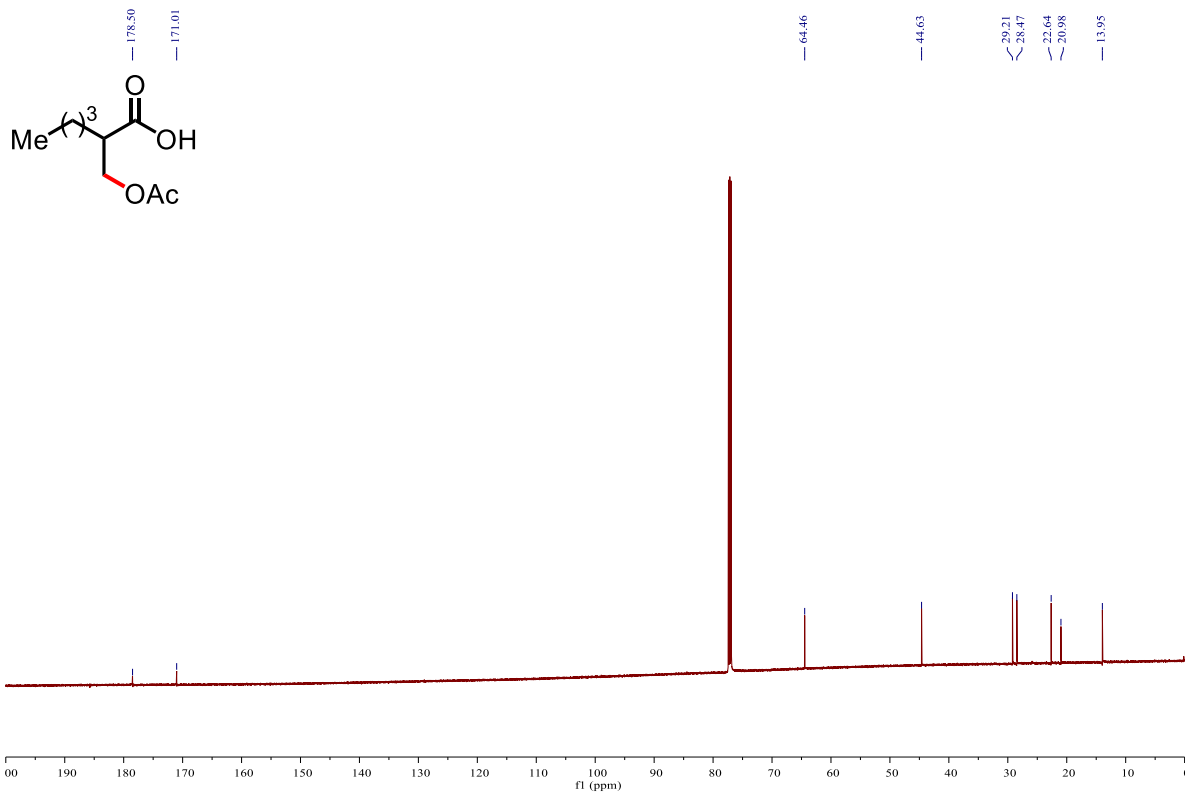

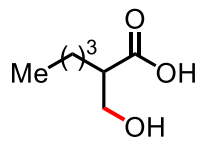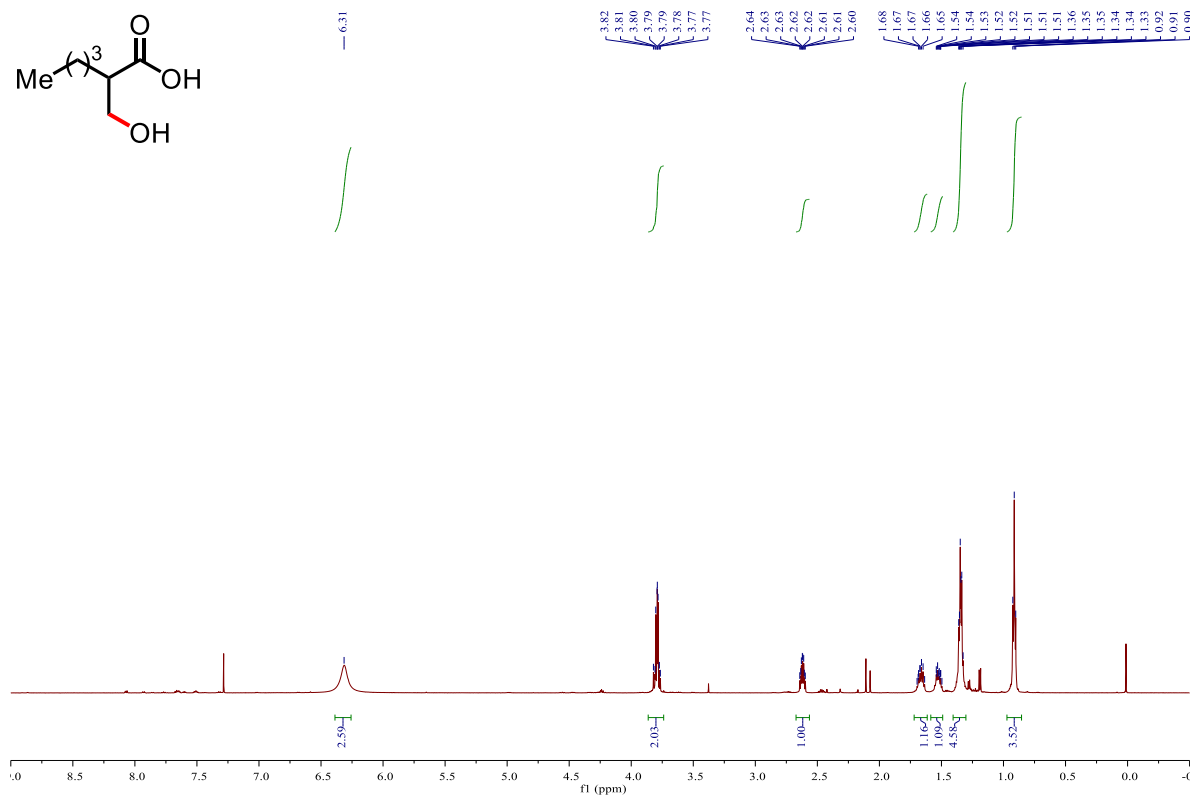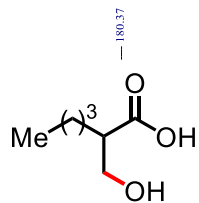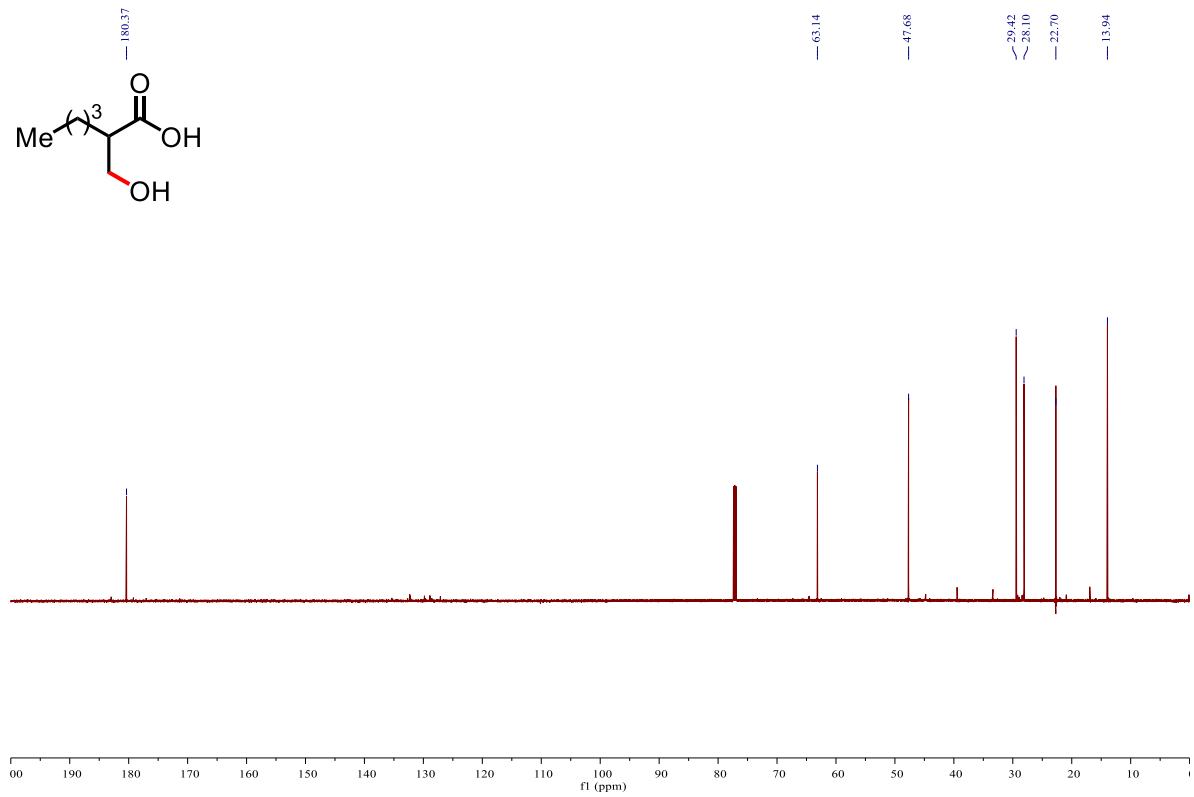

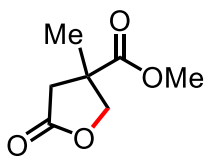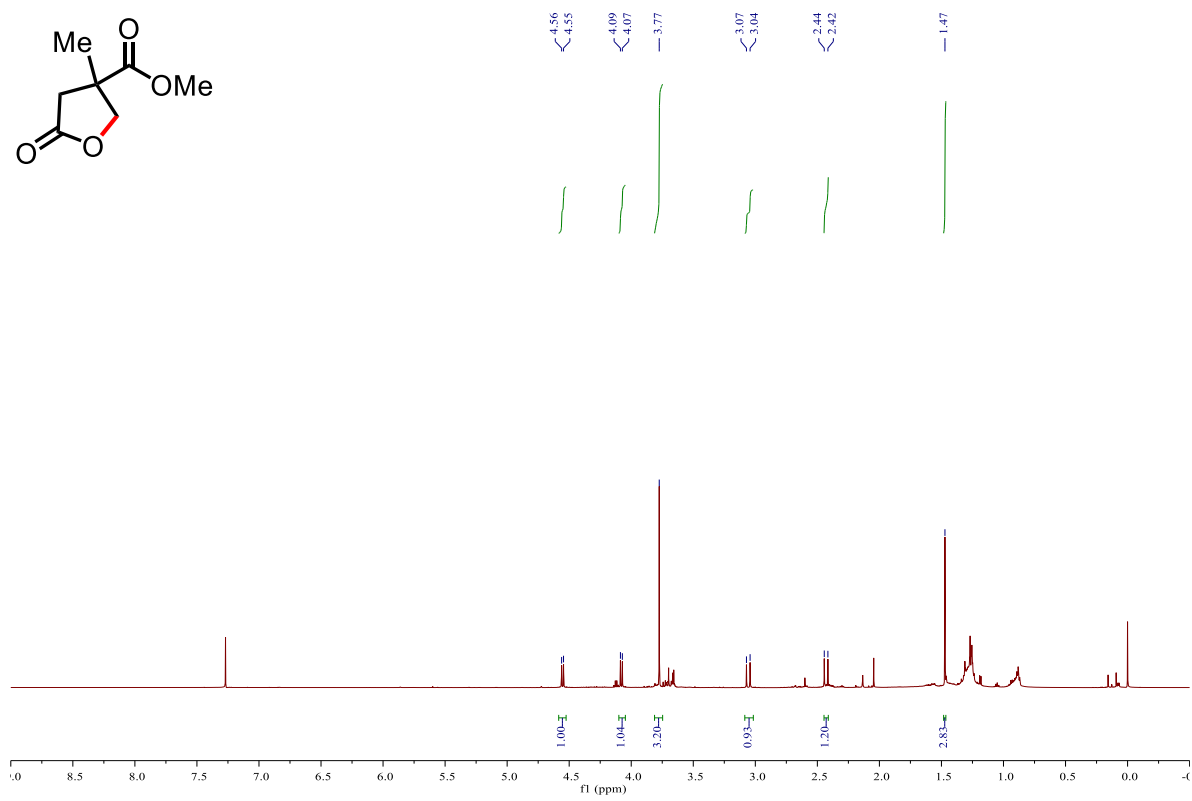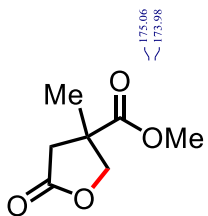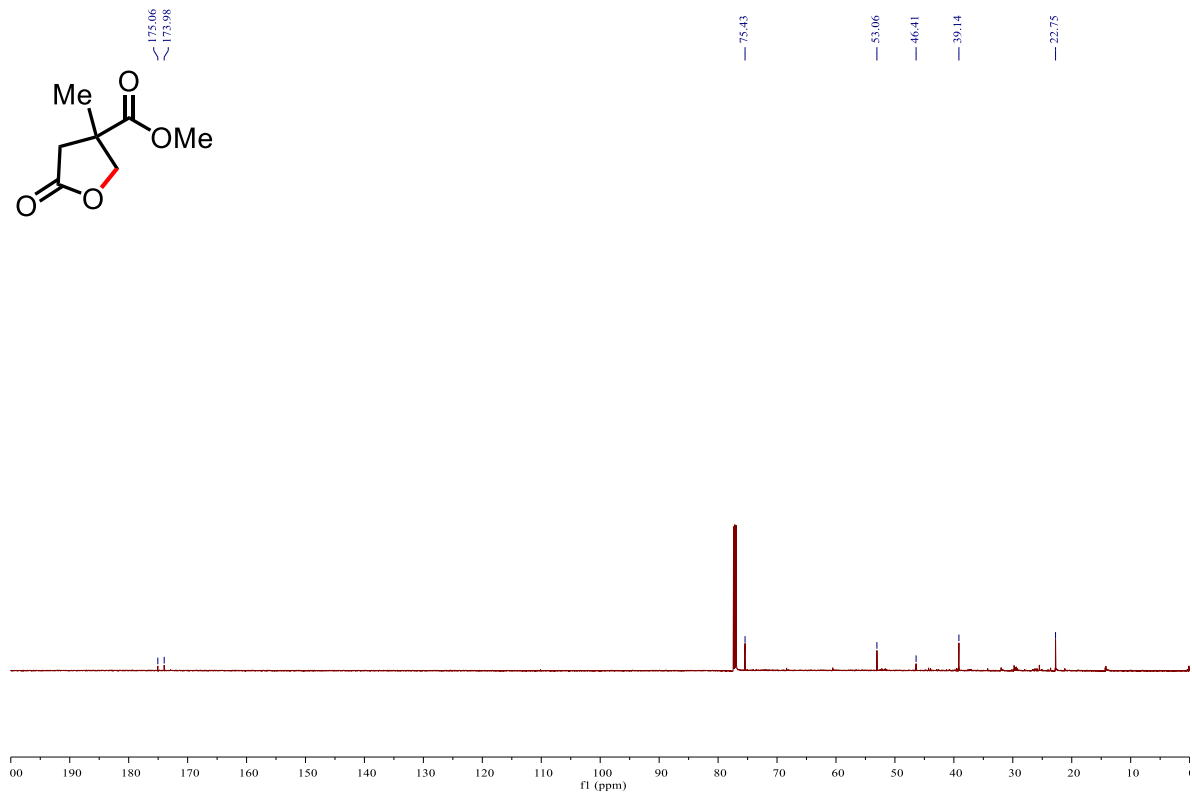

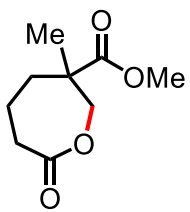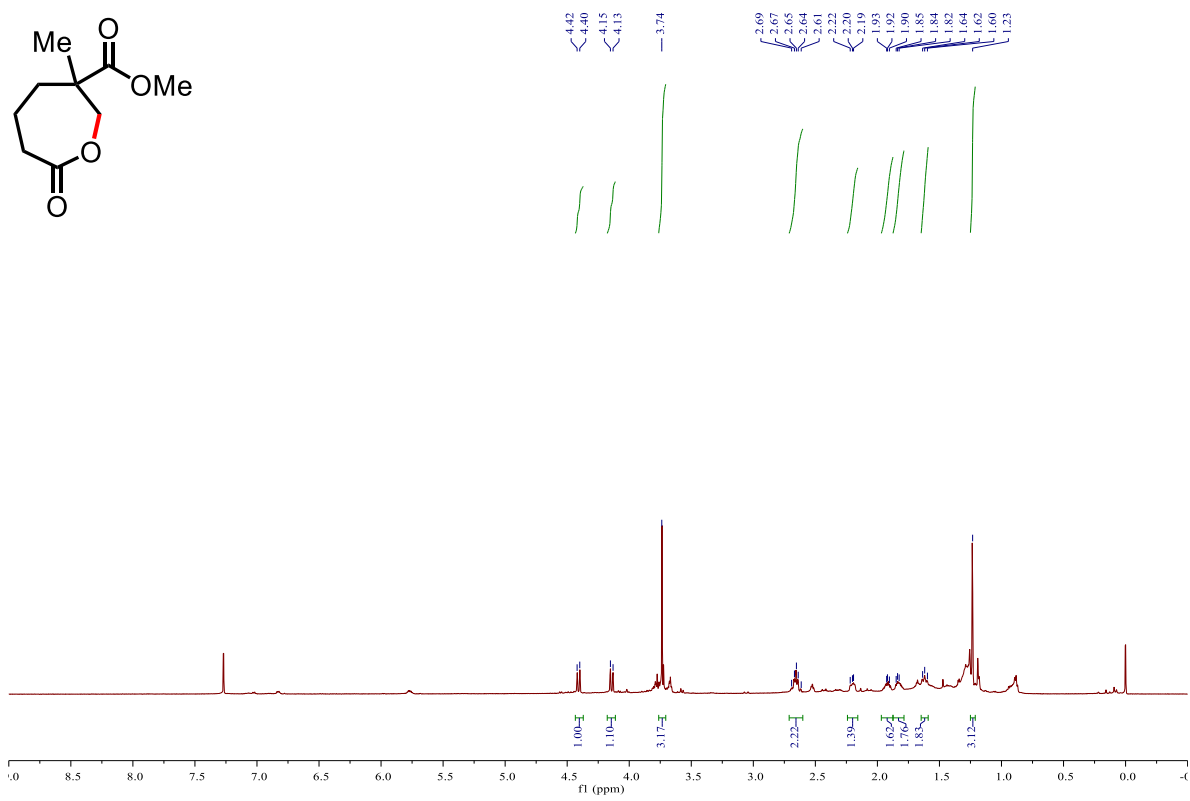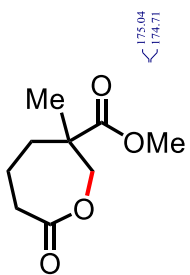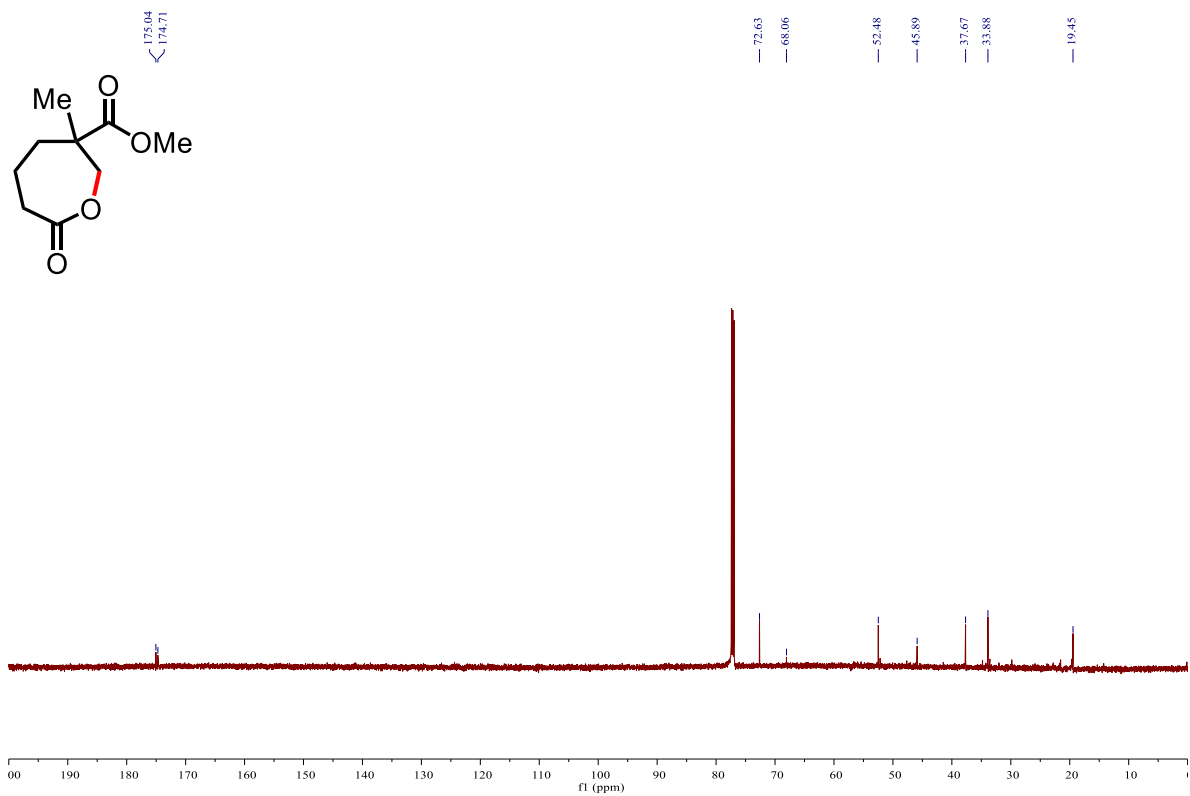

Supplement: NIHMS1584752-supplement-supporting_info.pdf [file NIHMS1584752-supplement-supporting_info.pdf]
